# Supplementary material
Source: PubMed Central journal article supplement (PMC2000856)
Supplement: NIHMS28058-supplement-01.pdf [file NIHMS28058-supplement-01.pdf]

-Supplementary Material for-

**Synthesis and biological evaluation of**

**(–)-dictyostatin and stereoisomers**

Youseung Shin,<sup>a</sup> Jean-Hugues Fournier,<sup>a</sup> Arndt Brückner,<sup>a</sup> Charitha Madiraju,<sup>b</sup> Raghavan  
Balachandran,<sup>b</sup> Brianne S. Raccor,<sup>a</sup> Michael C. Edler,<sup>d</sup> Ernest Hamel,<sup>d</sup> Rachel P. Sikorski,<sup>c</sup>  
Andreas Vogt,<sup>c</sup> Billy W. Day,<sup>a,b\*</sup> and Dennis P. Curran<sup>a\*</sup>

<sup>a</sup>Department of Chemistry, <sup>b</sup>Department of Pharmaceutical Sciences, and <sup>c</sup>Department of  
Pharmacology, University of Pittsburgh, Pittsburgh, PA 15261 USA, and <sup>d</sup>Toxicology and  
Pharmacology Branch, Developmental Therapeutics Program, Division of Cancer Treatment and  
Diagnosis, National Cancer Institute at Frederick, National Institutes of Health, Frederick, MD  
21702 USA

Emails: curran@pitt.edu, bday@pitt.edu

**Table of Contents**

|                                                                          |    |
|--------------------------------------------------------------------------|----|
| Synthesis of 6,16- <i>bis, epi</i> -dictyostatin .....                   | 2  |
| Synthesis of 6,14- <i>bis, epi</i> -dictyostatins.....                   | 13 |
| Copies of NMR spectra of compounds submitted to biological testing ..... | 32 |

**Synthesis of 6,16-bis, *epi*-dictyostatin****{3(*R*)-[2-(4-Methoxyphenyl)-5(*S*)-methyl[1(*S*),3]dioxan-4-yl]-2-oxobutyl}phosphonic acid dimethyl ester (**7**).**

BuLi (4.5 mL, 1.6 M solution in hexane) was added dropwise to a stirred solution of dimethyl methanephosphonate (0.77 mL, 7.1 mmol) in THF (7 mL) at  $-78\text{ }^{\circ}\text{C}$ . After 1 h, a solution of **6** (0.46 g, 1.42 mmol) in THF (1 mL) was added. After 30 min, the reaction was then allowed to warm to  $0\text{ }^{\circ}\text{C}$ , quenched by pouring into brine (10 mL) and extracted with EtOAc (2 x 5 mL) the combined extracts were washed with brine (10 mL), dried and chromatographed (EtOAc/hexane 1:1) gave **7** (0.47 g, 85%) as a colorless oil: IR ( $\text{CHCl}_3$ ) 3469, 2957, 2850, 1715, 1615, 1518, 1461, 1393, 1302, 1251, 1173, 1031, 828  $\text{cm}^{-1}$ ;  $^1\text{H}$  NMR (300 MHz,  $\text{CDCl}_3$ )  $\delta$  7.38 (m, 2H), 6.89 (m, 2H), 5.50 (s, 1H), 4.14 (dd,  $J = 11.3, 4.7$ , Hz, 1H), 4.06 (dd,  $J = 10.0, 2.7$  Hz, 1H), 3.80 (s, 3H), 3.77 (s, 3H), 3.74 (s, 3H), 3.59 (t,  $J = 11.1$  Hz, 1H), 3.38 (dd,  $J = 22.6, 14.5$  Hz, 1H), 3.17 (dd,  $J = 21.6, 14.5$  Hz, 1H), 3.02 (dq,  $J = 2.8, 7.0$  Hz, 1H), 2.06 (m, 1H), 1.26 (d,  $J = 7.0$  Hz, 3H), 0.85 (d,  $J = 6.7$  Hz, 3H);  $^{13}\text{C}$  NMR (75 MHz,  $\text{CDCl}_3$ )  $\delta$  202.5, 159.5, 130.4, 126.9, 113.1, 100.5, 82.1, 72.4, 54.9, 52.6, 48.6, 39.3, 37.6, 30.6, 11.6, 8.7; LRMS (EI) 386 ( $\text{M}^+$ ), 263, 193, 151, 137, 135, 124; HRMS (EI) calcd for  $\text{C}_{18}\text{H}_{27}\text{O}_7\text{P}$  ( $\text{M}^+$ ) 386.1494, found 386.1482;  $[\alpha]_{\text{D}}^{20} +4.2$  ( $c$  1.5,  $\text{CHCl}_3$ ).

**4(*R*)-Benzyl-3-[4-(2,2-dimethyl[1,3(*S*)]dioxolan-4-yl)-3(*S*)-hydroxy-2(*R*)-methylbutyryl]-oxazolidin-2-one (**10**).**

Diisopropylethylamine (13 mL) was added to a solution of propionyloxazolidinone (13.1 g) in anhydrous  $\text{CH}_2\text{Cl}_2$  (250 mL) at  $0\text{ }^{\circ}\text{C}$ , followed by dropwise addition of *n*-Bu<sub>2</sub>BOTf (1.0M in  $\text{CH}_2\text{Cl}_2$ , 68 mL). The solution was stirred for 1 h at  $0\text{ }^{\circ}\text{C}$ . A solution of crude aldehyde derived from **9** (8.9 g) in anhydrous  $\text{CH}_2\text{Cl}_2$  (10 mL) was added slowly at  $-78\text{ }^{\circ}\text{C}$ . After addition, the reaction mixture was warmed to  $0\text{ }^{\circ}\text{C}$  and stirred for 1 h, then quenched with pH7 phosphate buffer (20 mL). A solution of hydrogen peroxide (30 %, 40 mL) in MeOH (80 mL) was added at  $0\text{ }^{\circ}\text{C}$  and the mixture was stirred for 1 h. The reaction mixture was extracted with  $\text{CH}_2\text{Cl}_2$  (50 mL x 2) and dried over  $\text{MgSO}_4$  followed by flash chromatography (EtOAc/hexane 1:1) to yield 20.7 g of **10** (98%) as a colorless oil: IR ( $\text{CHCl}_3$ ) 3434, 2956, 2929, 2858, 1724, 1472, 1463, 1257, 1097, 836, 775  $\text{cm}^{-1}$ ;  $^1\text{H}$  NMR (300 MHz,  $\text{CDCl}_3$ )  $\delta$  7.33 (m, 3H), 7.22 (m, 2H), 4.72 (ddd,  $J = 10.5, 6.9, 3.2$  Hz, 1H), 4.35 (m, 1H), 4.23 (m, 3H), 4.12 (dd,  $J = 8.5, 6.5$  Hz, 1H), 3.82 (ddd,  $J = 10.2, 7.0, 3.2$  Hz, 1H), 3.61 (t,  $J = 7.7$  Hz, 1H), 3.25 (dd,  $J = 13.4, 3.3$  Hz, 1H), 2.82 (dd,  $J = 13.4, 9.4$  Hz, 1H), 1.80 (ddd,  $J = 14.2, 9.7, 4.6$  Hz, 1H), 1.68 (ddd,  $J = 10.8, 7.8, 3.0$  Hz, 1H), 1.43 (s, 3H), 1.38 (s, 3H), 1.30 (d,  $J = 7.0$  Hz, 3H);  $^{13}\text{C}$  NMR (75 MHz,  $\text{CDCl}_3$ )  $\delta$  176.9, 152.9, 134.9, 129.3, 128.8, 127.3, 108.6, 73.4, 69.5, 68.5, 66.0, 54.9, 42.4, 37.6, 37.5, 26.8, 25.6, 10.8;  $[\alpha]_{\text{D}}^{20} -28.1$  ( $c$  4.1,  $\text{CHCl}_3$ ).

**6-(2,2-Dimethyl[1,3(*S*)]dioxolan-4-yl)-5(*S*)-hydroxy-4(*R*)-methylhex-2-enoic acid ethyl ester (**11**).**

The aldol product **10** (5.39 g, 14.3 mmol) in 20 mL THF was added slowly to RED-Al (4.6 mL, 15.7 mmol) in 10 mL of THF at  $-78\text{ }^{\circ}\text{C}$ . The solution was stirred for 10-15 min at  $-78\text{ }^{\circ}\text{C}$ , then warmed to  $-50\text{ }^{\circ}\text{C}$  and stirred between  $-55$  and  $-40\text{ }^{\circ}\text{C}$  for 1 h. The reaction was quenched at  $-50\text{ }^{\circ}\text{C}$  with 20 mL of EtOAc and 2 mL of MeOH, then poured into a mixture of a saturated aqueous solution of Rochelle's salt (10 mL) and Et<sub>2</sub>O (12 mL) and stirred at  $-20\text{ }^{\circ}\text{C}$  for 10 min. The aqueous layer froze as a gel. The organic layer was separated and the aqueous layer was rinsed quickly with Et<sub>2</sub>O (2 x 10 mL). The combined organic extracts were dried over  $\text{MgSO}_4$ , filtered and concentrated *in vacuo*. The crude aldehyde was used without purification. Dry THF (40 mL) was treated with triethylphosphonoacetate (3.26 mL, 16.4 mmol) and potassium *tert*-

butoxide (1.86 g, 17.4 mmol). The mixture was stirred at room temperature for 10 min before cooling to  $-78\text{ }^{\circ}\text{C}$ . The crude aldehyde was added in THF (10 mL) and stirred overnight while warming to room temperature. The mixture was poured into brine (10 mL), extracted with  $\text{Et}_2\text{O}$  (3 x 20 mL), dried over  $\text{MgSO}_4$ , filtered and concentrated *in vacuo*. Flash silica gel chromatography (hexane/ $\text{EtOAc}$  3:2) provided **11** (2.02 g, 52 % for 2 steps) as a colorless oil: IR ( $\text{CHCl}_3$ ) 2984, 2938, 1719, 1651, 1370, 1270, 1183, 1060, 989  $\text{cm}^{-1}$ ;  $^1\text{H}$  NMR (300 MHz,  $\text{CDCl}_3$ )  $\delta$  6.88 (dd,  $J = 15.8, 8.0$  Hz, 1H), 5.83 (d,  $J = 15.8$  Hz, 1H), 4.28 (m, 1H), 4.14 (q,  $J = 7.1$  Hz, 1H), 4.03 (dd,  $J = 8.1, 6.0$  Hz, 1H), 3.76 (m, 1H), 3.53 (t,  $J = 8.0$  Hz, 1H), 2.48 (brs, 1H), 2.41 (m, 1H), 1.72-1.56 (m, 2H), 1.37 (s, 3H), 1.31 (s, 3H), 1.24 (t,  $J = 7.1$  Hz, 3H), 1.07 (d,  $J = 6.8$  Hz, 3H);  $^{13}\text{C}$  NMR (75 MHz,  $\text{CDCl}_3$ )  $\delta$  166.4, 150.3, 121.6, 108.6, 73.5, 71.3, 69.3, 60.2, 42.8, 37.2, 25.8, 25.5, 14.5, 14.1; LRMS (EI) 257 ( $\text{M}-\text{CH}_3$ )<sup>+</sup> 211, 169, 128, 87; HRMS (EI) calcd for  $\text{C}_{13}\text{H}_{21}\text{O}_5$  257.1389 ( $\text{M}-\text{CH}_3$ )<sup>+</sup> found 257.1382;  $[\alpha]_D^{20} -25.7$  ( $c$  1.6,  $\text{CHCl}_3$ ).

**(5S,7S,8)-tris(*tert*-Butyldimethylsilyloxy)-(4R)-methyloct-2-enoic acid ethyl ester (12).**

Dowex HCR-W2 ion-exchange resin (2.0 g, activated by aqueous 1N HCl for 24 h then filtered, MeOH as eluent) was added to a stirred solution of conjugated ester **11** (1.73 g) in MeOH (20 mL). After stirring for 24 h, the resin was filtered and filtrate was concentrated and dried for 2 h *in vacuo*. The triol was then used in next step without further purification. A stirred solution of triol and 2,6-lutidine (3.3 mL, 28.6 mmol) in  $\text{CH}_2\text{Cl}_2$  (30 mL) at  $0\text{ }^{\circ}\text{C}$  was treated with TBSOTf (5.1 mL, 22.2 mmol) and the reaction mixture was stirred for 1 h at  $0\text{ }^{\circ}\text{C}$ . The reaction mixture was quenched by the addition of  $\text{H}_2\text{O}$  (25 mL). The reaction mixture was extracted by  $\text{CH}_2\text{Cl}_2$  and dried over  $\text{MgSO}_4$  followed by the evaporation of the solvent under reduced pressure. The residue was purified by short column chromatography (hexane/ $\text{EtOAc}$  9:1) whereupon the **12** (2.96 g, 81 % for 2 steps) was obtained as a colorless oil: IR ( $\text{CHCl}_3$ ) 2956, 2930, 2858, 1724, 1652, 1472, 1463, 1362, 1256, 1097, 836, 775  $\text{cm}^{-1}$ ;  $^1\text{H}$  NMR (300 MHz,  $\text{CDCl}_3$ )  $\delta$  7.04 (dd,  $J = 15.9, 6.7$  Hz, 1H), 5.75 (dd,  $J = 15.9, 1.5$  Hz, 1H), 4.16 (dq,  $J = 1.3, 7.1$  Hz, 2H), 3.84 (quint,  $J = 3.6$  Hz, 1H), 3.71 (m, 1H), 3.49 (dd,  $J = 10.1, 5.4$  Hz, 1H), 3.36 (dd,  $J = 10.1, 5.8$  Hz, 1H), 2.48 (m, 1H), 1.59-1.40 (m, 2H), 1.25 (t,  $J = 7.1$  Hz, 3H), 0.99 (d,  $J = 6.8$  Hz, 3H), 0.85 (m, 27H), 0.056 (s, 3H), 0.049 (s, 3H), 0.04 (s, 3H), 0.02 (s, 3H), 0.01 (s, 6H);  $^{13}\text{C}$  NMR (75 MHz,  $\text{CDCl}_3$ )  $\delta$  166.6, 151.7, 120.8, 72.8, 71.4, 68.0, 60.0, 42.2, 39.5, 25.9, 25.7, 18.3, 18.1, 14.2, 13.3,  $-3.0$ ,  $-3.6$ ,  $-4.2$ ,  $-4.5$ ,  $-5.4$ ; LRMS (EI) 517 ( $\text{M}-\text{tBu}$ )<sup>+</sup> 385, 315, 271, 231, 147; HRMS (EI) calcd for  $\text{C}_{25}\text{H}_{53}\text{O}_5\text{Si}_3$  517.3201 ( $\text{M}-\text{tBu}$ )<sup>+</sup> found 517.3179;  $[\alpha]_D^{20} -29.6$  ( $c$  0.92,  $\text{CHCl}_3$ ).

**(5S,7S)-bis(*tert*-Butyldimethylsilyloxy)-8-hydroxy-4(R)-methyloct-2-enoic acid ethyl ester (13).**

A solution of TBS ether **12** (7.4 g, 12.9 mmol) in THF (10 mL) was slowly treated with HF-pyridine in pyridine (40 mL, prepared by slow addition of 12 mL pyridine to 3 mL HF-pyridine complex followed by dilution with 25 mL THF). The mixture was stirred overnight at room temperature and quenched with saturated aqueous  $\text{NaHCO}_3$  (100 mL). The aqueous layer was separated and extracted with  $\text{Et}_2\text{O}$  (3 x 50 mL). The combined organic layers were washed with saturated aqueous  $\text{CuSO}_4$  (3 x 50 mL), dried over  $\text{MgSO}_4$ , filtered and concentrated. Flash column chromatography ( $\text{EtOAc}$ /hexane 1:4) afforded 3.86 g (65%) of the alcohol **13** as a colorless oil: IR ( $\text{CHCl}_3$ ) 3492, 2956, 2930, 2857, 1722, 1472, 1367, 1256, 1092, 1039, 836, 775  $\text{cm}^{-1}$ ;  $^1\text{H}$  NMR (300 MHz,  $\text{CDCl}_3$ )  $\delta$  7.01 (dd,  $J = 15.9, 6.7$  Hz, 1H), 5.75 (dd,  $J = 15.9, 1.5$  Hz, 1H), 4.15 (dq,  $J = 1.2, 7.2$  Hz, 2H), 3.75 (m, 1H), 3.56 (m, 1H), 3.40 (m, 1H), 2.44 (m, 1H), 1.85 (t,  $J = 5.9$  Hz, 1H), 1.61 (ddd,  $J = 11.5, 6.4, 5.0$  Hz, 1H), 1.50 (ddd,  $J = 13.0, 7.2, 5.8$  Hz, 1H), 1.25 (t,  $J = 7.1$  Hz, 3H), 0.99 (d,  $J = 6.9$  Hz, 3H), 0.86 (s, 9H), 0.85 (s, 9H), 0.60 (s, 6H), 0.34 (s, 3H), 0.02 (s, 3H);  $^{13}\text{C}$  NMR (75 MHz,  $\text{CDCl}_3$ )  $\delta$  166.5, 151.1, 121.1, 72.8, 71.0, 66.9, 60.1, 41.8,

38.7, 25.8, 18.0, 14.2, 13.3, -4.2, -4.3; LRMS (ESI) 461 [M+H]<sup>+</sup>; HRMS (ESI) calcd for C<sub>23</sub>H<sub>49</sub>O<sub>5</sub>Si<sub>2</sub> 461.3119 [M+H]<sup>+</sup>, found 461.3091; [α]<sub>D</sub><sup>20</sup> -24.3 (*c* 5.9, CHCl<sub>3</sub>).

**(5*S*,7*S*)-bis(*tert*-Butyldimethylsilanyloxy)-(4*R*)-methyl-8-oxooct-2-enoic acid ethyl ester (14).**

Alcohol **13** (3.86 g, 8.34 mmol) in CH<sub>2</sub>Cl<sub>2</sub> (20 mL) was treated with the Dess-Martin periodinane (5.3 g, 12.5 mmol). After 1 h, the mixture was quenched with saturated aqueous NaHCO<sub>3</sub> (50 mL). The aqueous layer was extracted with Et<sub>2</sub>O (2 x 20 mL) and the combined extracts were dried over anhydrous MgSO<sub>4</sub>. Filtration and concentration followed by short flash column chromatography (hexane/EtOAc 4:1) to remove the residue from the Dess-Martin reagent provided the aldehyde **14** as a colorless oil: <sup>1</sup>H NMR (300 MHz, CDCl<sub>3</sub>) δ 9.53 (d, *J* = 1.5 Hz, 1H), 7.02 (dd, *J* = 15.9, 6.6 Hz, 1H), 5.77 (dd, *J* = 15.9, 1.4 Hz, 1H), 4.15 (q, *J* = 7.2 Hz, 2H), 4.07 (ddd, *J* = 7.7, 4.8, 1.4 Hz, 1H), 3.84 (ddd, *J* = 8.6, 6.8, 4.4 Hz, 1H), 2.52 (m, 1H), 1.75-1.56 (m, 2H), 1.25 (t, *J* = 7.1 Hz, 3H), 0.99 (d, *J* = 6.9 Hz, 3H), 0.89 (s, 9H), 0.86 (s, 9H), 0.07 (s, 3H), 0.05 (s, 3H), 0.03 (s, 6H).

**5(*S*),7(*S*)-bis(*tert*-Butyldimethylsilanyloxy)-10(*S*)-[2-(4-methoxybenzyl)-5(*S*)-methyl-[1,3(*R*)]dioxan-4-yl]-4(*R*)-methylundeca-2,8-dienoic acid ethyl ester (15).**

NaHMDS (1.0 M in THF, 12.3 mL, 12.3 mmol) was slowly added to a solution of the salt **8** (8.72 g, 13.7 mmol) in dry THF (13.7 mL) at 0 °C. The resulting red solution was stirred at room temperature for 20 min. The mixture was cooled to -78 °C and a solution of the aldehyde **14** (5.03 g, 10.9 mmol) in THF (2.0 mL) was added dropwise. The mixture was stirred for 20 min at -78 °C and then warmed to room temperature. After 4 h at room temperature, the mixture was quenched with saturated NH<sub>4</sub>Cl (20 mL) and extracted with diethyl ether (3 x 30 mL). The combined organic layers were dried over anhydrous MgSO<sub>4</sub>, evaporated and the residue was purified by column chromatography (hexane/EtOAc 9:1) to yield **15** (5.65 g, 75 %) as a colorless oil: IR (CHCl<sub>3</sub>) 2957, 2929, 2856, 1720, 1650, 1617, 1518, 1463, 1370, 1250, 1158, 1073, 1032, 836, 774 cm<sup>-1</sup>; <sup>1</sup>H NMR (300 MHz, CDCl<sub>3</sub>) δ 7.34 (m, 2H), 6.99 (dd, *J* = 15.8, 6.9 Hz, 1H), 6.82 (m, 2H), 5.72 (dd, *J* = 15.8, 1.5 Hz, 1H), 5.36 (s, 1H), 5.32 (dd, *J* = 11.1, 8.6 Hz, 1H), 5.18 (t, *J* = 10.8 Hz, 1H), 4.55 (ddd, *J* = 12.6, 8.6, 4.1 Hz, 1H), 4.12 (m, 2H), 3.99 (d, *J* = 7.2, 2.1 Hz, 1H), 3.91 (m, 1H), 3.77 (s, 3H), 3.52 (dd, *J* = 9.3, 2.1 Hz, 1H), 2.64 (m, 1H), 2.37 (m, 1H), 1.64 (m, 1H), 1.46 (m, 2H), 1.22 (t, *J* = 7.1 Hz, 3H), 1.15 (d, *J* = 6.9 Hz, 3H), 0.93 (d, *J* = 6.8 Hz, 6H), 0.86 (s, 18H), 0.06 (s, 3H), 0.05 (s, 3H), 0.04 (s, 3H), 0.02 (s, 3H); <sup>13</sup>C NMR (75 MHz, CDCl<sub>3</sub>) δ 166.5, 159.7, 151.9, 133.8, 132.7, 131.3, 120.8, 113.4, 101.7, 83.6, 73.8, 71.9, 66.4, 60.0, 55.1, 43.6, 42.9, 34.2, 29.8, 26.0, 25.9, 18.1, 15.6, 14.2, 13.5, 11.2, -3.0, -3.8, -4.1, -4.5; LRMS (API-ES) 729.4 [M+K]<sup>+</sup>; HRMS (ESI) calcd for C<sub>36</sub>H<sub>66</sub>O<sub>7</sub>Si<sub>2</sub>K 729.3984 [M+K]<sup>+</sup>, found 729.4013; [α]<sub>D</sub><sup>20</sup> -8.7 (*c* 6.8, CHCl<sub>3</sub>).

**5(*S*),7(*S*)-bis(*tert*-Butyldimethylsilanyloxy)-10(*S*)-[2-(4-methoxybenzyl)-5(*S*)-methyl-[1,3(*R*)]dioxan-4-yl]-4(*R*)-methylundeca-2,8-dien-1-ol (16).**

Aqueous KOH (1N, 45 mL) was added to a stirred solution of ester **15** (3.13 g, 4.53 mmol) in EtOH (20 mL), THF (2 mL) and the mixture was refluxed gently until the ester disappeared (about 6 h) as determined by TLC. The ethanolic solution was concentrated and then diluted with EtOAc (50 mL). After the solution was acidified to pH 3 with 1N HCl solution, the organic phase was separated and the aqueous phase was extracted with EtOAc (2 x 10 mL). The combined organic phases were dried with MgSO<sub>4</sub>, concentrated and used next step without further purification. The carboxylic acid was treated with NEt<sub>3</sub> (1.5 mL) and ethyl chloroformate (0.67 mL) in dry THF (50 mL) at -10 °C. After 15 min, the mixture was warmed to 0 °C and a solution of NaBH<sub>4</sub> (1.2 g) in H<sub>2</sub>O (10 mL) was added. After 4 h, the reaction was quenched by addition of sat'd Rochelle's salt solution and Et<sub>2</sub>O. The layers were separated and the organic layer was

washed with H<sub>2</sub>O, sat'd NaHCO<sub>3</sub> solution and brine, dried with MgSO<sub>4</sub>. Rotary evaporation and silica column chromatography (hexane/EtOAc 4:1) gave product **16** (1.79 g, 61 %) as a colorless oil: IR (CHCl<sub>3</sub>) 3433, 2957, 2929, 2856, 1617, 1518, 1462, 1388, 1250, 1074, 836, 773 cm<sup>-1</sup>; <sup>1</sup>H NMR (300 MHz, CDCl<sub>3</sub>) δ 7.38 (m, 2H), 6.84 (m, 2H), 5.63 (dd, *J* = 15.7, 6.2 Hz, 1H), 5.48 (dt, *J* = 16.0, 5.6 Hz, 1H), 5.37 (t, *J* = 10.6 Hz, 1H), 4.59 (m, 1H), 3.99 (m, 2H), 3.93 (m, 1H), 3.87 (m, 2H), 3.77 (s, 3H), 3.49 (dd, *J* = 9.6, 2.0 Hz, 1H), 2.68 (m, 1H), 2.31 (m, 1H), 1.79 (brs, 1H), 1.64 (m, 1H), 1.44 (m, 2H), 1.15 (d, *J* = 6.9 Hz, 3H), 0.92 (d, *J* = 6.9 Hz, 3H), 0.88 (m, 21H), 0.09 (s, 3H), 0.06 (s, 3H), 0.05 (s, 6H); <sup>13</sup>C NMR (75 MHz, CDCl<sub>3</sub>) δ 159.6, 134.4, 134.3, 132.4, 131.5, 129.1, 127.4, 113.4, 101.5, 83.5, 73.8, 72.8, 66.5, 63.7, 55.2, 42.2, 34.1, 29.8, 26.1, 25.9, 18.14, 18.10, 15.5, 15.2, 11.3, -2.9, -4.1, -4.2; LRMS (API-ESI) 671.3 [M+Na]<sup>+</sup>; HRMS (ESI) calcd for C<sub>36</sub>H<sub>64</sub>O<sub>6</sub>Si<sub>2</sub>Na 671.4139 [M+Na]<sup>+</sup>, found 671.4141; [α]<sub>D</sub><sup>20</sup> -14.0 (*c* 1.5, CHCl<sub>3</sub>).

**4-[4(S),6(S)-bis(tert-Butyldimethylsilyloxy)-1(S),7(R)-dimethyl-10-trityloxydeca-2,8-dienyl]-2-(4-methoxybenzyl)-5(S)-methyl[1,3(R)]dioxane (17).**

Trityl chloride (0.094 g) and DMAP (0.041 g) were added to a solution of alcohol **16** (0.11 g) in pyridine (1.6 mL). The mixture was then refluxed for 18 h, cooled to ambient temperature and added to a solution of sat'd CuSO<sub>4</sub> (20 mL). The mixture was extracted with Et<sub>2</sub>O (2 x 20 mL), washed sat'd CuSO<sub>4</sub> (2 x 20 mL). The organic layer was separated, dried (MgSO<sub>4</sub>), filtered, and concentrated *in vacuo*. Flash column chromatography (EtOAc/hexane 1:9) provided product **17** (0.14 g, 99 %) as a pale yellow oil: IR (CHCl<sub>3</sub>) 2956, 2926, 2855, 1616, 1517, 1462, 1378, 1249, 1073, 835, 773, 705 cm<sup>-1</sup>; <sup>1</sup>H NMR (300 MHz, CDCl<sub>3</sub>) δ 7.63 (m, 6H), 7.51 (m, 2H), 7.40 (m, 9H), 6.93 (m, 2H), 5.91 (dd, *J* = 15.7, 6.5 Hz, 1H), 5.66 (dt, *J* = 15.5, 5.2 Hz, 1H), 5.55 (m, 1H), 5.53 (s, 1H), 5.39 (t, *J* = 10.2 Hz, 1H), 4.78 (dt, *J* = 3.1, 8.9 Hz, 1H), 4.10 (m, 3H), 3.80 (s, 3H), 3.70 (m, 3H), 2.85 (m, 1H), 2.45 (m, 1H), 1.78 (m, 1H), 1.65 (m, 2H), 1.31 (d, *J* = 6.9 Hz, 3H), 1.08 (m, 24H), 0.28 (s, 3H), 0.27 (s, 3H), 0.25 (s, 6H); <sup>13</sup>C NMR (75 MHz, CDCl<sub>3</sub>) δ 159.5, 146.8, 144.3, 135.0, 134.1, 132.4, 131.3, 128.6, 127.8, 127.6, 127.3, 127.1, 126.7, 126.3, 113.3, 101.5, 86.6, 83.4, 73.8, 72.7, 66.6, 65.0, 55.0, 43.5, 42.8, 34.2, 29.9, 26.1, 25.9, 18.1, 15.7, 14.5, 11.3, -2.9, -3.8, -4.1, -4.3; LRMS (API-ESI) 929.5 [M+K]<sup>+</sup>; HRMS (ESI) calcd for C<sub>55</sub>H<sub>78</sub>O<sub>6</sub>Si<sub>2</sub>K 929.4969 [M+K]<sup>+</sup>, found 929.5008; [α]<sub>D</sub><sup>20</sup> -7.3 (*c* 1.1, CHCl<sub>3</sub>).

**7(S),9(S)-bis(tert-Butyldimethylsilyloxy)-3-(4-methoxybenzyloxy)-2(S)(S),10(R)-trimethyl-13-trityloxytrideca-5,11-dien-1-ol (18).**

DIBALH (21 mL, 21 mmol, 1.0 M solution in hexane) was added to the PMB acetal **17** (3.75 g, 4.21 mmol) in CH<sub>2</sub>Cl<sub>2</sub> (20 mL) at -78 °C dropwise and then reaction mixture was warmed up to 0 °C and stirred for 1 h. The reaction mixture was quenched by EtOAc (10 mL) and sat'd sodium potassium tartrate solution (50 mL) followed by vigorously stirring for 4 h. The aqueous phase was extracted with CH<sub>2</sub>Cl<sub>2</sub> (3 x 20 mL) and the combined organic layers were washed with brine (30 mL). After drying over MgSO<sub>4</sub> and evaporation under vacuum, flash column chromatography (hexane/EtOAc 4:1) provided **18** (2.78 g, 74 %) as a colorless oil: IR (CHCl<sub>3</sub>) 3434, 2956, 2928, 2856, 1612, 1514, 1471, 1249, 1073, 836, 774, 706 cm<sup>-1</sup>; <sup>1</sup>H NMR (300 MHz, CDCl<sub>3</sub>) δ 7.48 (m, 6H), 7.29 (m, 11H), 6.84 (m, 2H), 5.84 (dd, *J* = 15.7, 6.2 Hz, 1H), 5.57 (dt, *J* = 15.7, 5.4 Hz, 1H), 5.44 (t, *J* = 8.7 Hz, 2H), 4.63 (m, 1H), 4.53 (d, *J* = 10.9 Hz, 1H), 4.46 (d, *J* = 10.9 Hz, 1H), 3.94 (m, 1H), 3.80 (s, 3H), 3.57 (d, *J* = 4.8 Hz, 2H), 3.48 (m, 1H), 3.31 (m, 2H), 2.80 (m, 1H), 2.42 (m, 1H), 1.84 (m, 2H), 1.55 (ddd, *J* = 14.2, 10.1, 1.9 Hz, 1H), 1.40 (ddd, *J* = 13.9, 8.6, 2.0 Hz, 1H), 1.07 (d, *J* = 6.8 Hz, 3H), 0.97 (m, 12H), 0.93 (s, 9H), 0.87 (d, *J* = 7.0 Hz, 3H), 0.16 (s, 3H), 0.15 (s, 3H), 0.11 (s, 3H), 0.10 (s, 3H); <sup>13</sup>C NMR (75 MHz, CDCl<sub>3</sub>) δ 159.0, 144.3, 134.0, 133.7, 131.5, 130.9, 129.3, 128.6, 127.9, 127.7, 127.2, 126.8, 126.5, 113.6, 86.7, 84.0, 73.9, 73.0, 66.2, 65.8, 65.1, 55.2, 42.3, 42.2, 38.0, 35.1, 26.0, 25.9, 18.5, 18.2, 18.1, 14.8, 12.0, -2.9, -4.0, -4.19, -

4.23; LRMS (API-ESI) 931 [M+K]<sup>+</sup>; HRMS (ESI) calcd for C<sub>55</sub>H<sub>80</sub>O<sub>6</sub>Si<sub>2</sub>K 931.5125 [M+K]<sup>+</sup>, found 931.5152; [α]<sub>D</sub><sup>20</sup> -21.4 (c 0.52, CHCl<sub>3</sub>).

**9(S),11(S)-bis(*tert*-Butyldimethylsilanyloxy)-5(R)-(4-methoxybenzyloxy)-4(S),6(S),12(R)-trimethyl-15-trityloxypentadeca-2,7,13-trienoic acid ethyl ester (19).**

The alcohol **18** (2.01 g, 2.25 mmol) in CH<sub>2</sub>Cl<sub>2</sub> (20 mL) was treated with Dess-Martin periodinane (1.43 g, 3.4 mmol). After 1 h, the mixture was quenched with saturated NaHCO<sub>3</sub> (20 mL). The aqueous layer was extracted with ethyl ether (25 mL x 2) and the combined extracts were dried over anhydrous MgSO<sub>4</sub>. Filtration and concentration followed by short flash column chromatography (hexane/EtOAc 3:1) to remove the residue from the Dess-Martin reagent provided crude aldehyde as a colorless oil, which was used for the next reaction without further purification. To a stirred solution of triethyl phosphonoacetate (0.51 mL, 2.6 mmol) in THF (20 mL) cooled to -78 °C was added dropwise potassium *tert*-butoxide (0.29 g, 2.5 mmol) and stirred for 30 min. Thereafter the above aldehyde in THF (5 mL) was added and the solution was stirred for 1 h at -78 °C, then 2 h at 0 °C. The reaction mixture was quenched by addition of a sat'd NH<sub>4</sub>Cl solution (5 mL) and diluted with diethyl ether (20 mL). The layer was separated and organic phase was washed with brine (20 mL) and dried with MgSO<sub>4</sub>, filtered, and concentrated. The residue was purified by flash chromatography (EtOAc/hexane 1:9), yielding 2.01 g of unsaturated ester **19** (93 % for 2 steps) as a colorless oil: IR (CHCl<sub>3</sub>) 2956, 2929, 2856, 1718, 1650, 1612, 1514, 1448, 1250, 1180, 1074, 836, 774, 706 cm<sup>-1</sup>; <sup>1</sup>H NMR (300 MHz, CDCl<sub>3</sub>) δ 7.55 (m, 6H), 7.34 (m, 11H), 7.09 (dd, *J* = 15.8, 7.1 Hz, 1H), 6.89 (m, 2H), 5.89 (dd, *J* = 15.7, 5.8 Hz, 1H), 5.78 (d, *J* = 15.8 Hz, 1H), 5.66 (dt, *J* = 6.0, 15.7 Hz, 1H), 5.45 (m, 2H), 4.66 (m, 1H), 4.51 (m, 2H), 4.23 (m, 2H), 3.99 (m, 1H), 3.83 (s, 3H), 3.66 (d, *J* = 5.3 Hz, 2H), 3.29 (t, *J* = 4.7 Hz, 1H), 2.79 (m, 1H), 2.65 (m, 1H), 2.49 (m, 1H), 1.60 (m, 1H), 1.48 (m, 1H), 1.33 (t, *J* = 7.1 Hz, 3H), 1.12 (d, *J* = 6.7 Hz, 3H), 1.11 (d, *J* = 6.6 Hz, 3H), 1.06 (d, *J* = 6.9 Hz, 3H), 1.01 (s, 9H), 1.00 (s, 9H), 0.20 (s, 3H), 0.19 (s, 3H), 0.17 (s, 3H), 0.15 (s, 3H); <sup>13</sup>C NMR (75 MHz, CDCl<sub>3</sub>) δ 166.5, 158.9, 152.2, 144.3, 134.3, 133.9, 131.0, 130.5, 129.3, 128.6, 127.6, 126.7, 126.4, 120.2, 113.5, 107.0, 86.6, 85.5, 73.4, 72.8, 66.3, 65.1, 59.9, 55.1, 42.2, 38.9, 35.2, 26.0, 25.9, 18.2, 18.1, 14.6, 14.2, 13.7, -3.0, -4.1, -4.2, -4.3; LRMS (API-ESI) 999.5 [M+K]<sup>+</sup>; HRMS (ESI) calcd for C<sub>59</sub>H<sub>84</sub>O<sub>7</sub>Si<sub>2</sub>K 999.5393 [M+K]<sup>+</sup>, found 999.5387; [α]<sub>D</sub><sup>20</sup> +4.6 (c 3.1, CHCl<sub>3</sub>).

**9(S),11(S)-bis(*tert*-Butyldimethylsilanyloxy)-5(R)-(4-methoxybenzyloxy)-4(S),6(S),12(R)-trimethyl-15-trityloxypentadeca-7,13-dienoic acid ethyl ester (20).**

NiCl<sub>2</sub>·6H<sub>2</sub>O (0.25 g) then portionwise NaBH<sub>4</sub> (0.16 g) were added to a stirred solution of unsaturated ester **19** (2.02 g, 2.10 mmol) in MeOH (10 mL), THF (1 mL) at 0 °C. After 1 h, the reaction mixture was evaporated and filtered through celite eluting with Et<sub>2</sub>O (5 mL). The organic phase was concentrated and the residue was purified by flash chromatography (EtOAc/hexane 1:9) to yield 1.96 g (2.04 mmol) of product **20** (97 %) as a colorless oil: IR (CHCl<sub>3</sub>) 2956, 2929, 2856, 1735, 1613, 1514, 1479, 1448, 1374, 1249, 1174, 1072, 836, 773, 706 cm<sup>-1</sup>; <sup>1</sup>H NMR (300 MHz, CDCl<sub>3</sub>) δ 7.53 (m, 6H), 7.33 (m, 11H), 6.84 (m, 2H), 5.81 (dd, *J* = 15.7, 6.1 Hz, 1H), 5.65 (m, 1H), 5.45 (m, 2H), 4.65 (m, 1H), 4.56 (d, *J* = 10.9 Hz, 1H), 4.45 (d, *J* = 10.9 Hz, 1H), 4.14 (q, *J* = 7.1 Hz, 2H), 3.96 (m, 1H), 3.80 (s, 3H), 3.62 (m, 2H), 3.14 (m, 1H), 2.79 (m, 1H), 2.43 (m, 1H), 2.23 (m, 1H), 1.72 (m, 2H), 1.54 (m, 3H), 1.28 (t, *J* = 7.1 Hz, 3H), 1.06 (d, *J* = 6.7 Hz, 3H), 1.01 (d, *J* = 6.9 Hz, 3H), 0.97 (s, 18H), 0.93 (d, *J* = 6.4 Hz, 3H), 0.17 (s, 3H), 0.154 (s, 3H), 0.151 (s, 3H), 0.14 (s, 3H); <sup>13</sup>C NMR (75 MHz, CDCl<sub>3</sub>) δ 173.6, 158.8, 144.4, 134.6, 133.6, 132.1, 131.2, 129.1, 128.7, 127.7, 126.8, 126.4, 103.4, 86.6, 86.1, 73.8, 72.8, 66.5, 65.2, 60.0, 55.1, 42.8, 42.3, 35.4, 35.1, 32.3, 29.4, 26.0, 25.9, 18.4, 18.1, 14.6, 14.2, 13.9, -2.9, -4.0, -4.1; LRMS (API-ESI) 1001.5 [M+K]<sup>+</sup>; HRMS (ESI) calcd for C<sub>59</sub>H<sub>86</sub>O<sub>7</sub>Si<sub>2</sub>K 1001.5549 [M+K]<sup>+</sup>, found 1001.5586; [α]<sub>D</sub><sup>20</sup> -9.8 (c 0.95, CHCl<sub>3</sub>).

**4(R)-Benzyl-3-[9(S),11(S)-bis(*tert*-butyldimethylsilanyloxy)-5(R)-(4-methoxybenzyloxy)-4(R),6(S),12(S)-trimethyl-15-trityloxy-pentadeca-7,13-dienoyl]oxazolidin-2-one (21).**

1N aqueous KOH solution (17 mL) was added to a stirred solution of ester **20** (1.61 g, 1.67 mmol) in EtOH (20 mL) and THF (2 mL). The mixture was refluxed gently until the ester disappeared (about 6 h) as determined by TLC analysis. The ethanolic solution was concentrated and then diluted with EtOAc (20 mL). After the solution was acidified to pH3 with 1N HCl solution, organic phase was separated and aqueous phase was extracted with EtOAc (2 x 10 mL). The combined organic phases were dried with MgSO<sub>4</sub>, concentrated and used as crude without further purification. A solution of the above acid and Et<sub>3</sub>N (0.47 mL) in dry THF (17 mL) was cooled to -78 °C, treated dropwise with pivaloyl chloride (0.25 mL), stirred in the cold for 1 h, and warmed to 0 °C prior to the addition of the Evans (*S*)-oxazolidinone (0.30 g) and LiCl (0.21 g). This reaction mixture was stirred overnight at room temperature and diluted with water (10 mL). The separated aqueous phase was extracted with ether (2 x 10 mL) and the combined organic phase were dried and evaporated and flash column chromatography (EtOAc/hexane 1:4) gave the product **21** (1.52 g, 83 %) as a colorless oil: IR (CHCl<sub>3</sub>) 2956, 2856, 1785, 1701, 1612, 1513, 1449, 1385, 1249, 1074, 910, 836, 774, 734, 706 cm<sup>-1</sup>; <sup>1</sup>H NMR (300 MHz, CDCl<sub>3</sub>) δ 7.47 (m, 6H), 7.30 (m, 10H), 7.24 (m, 6H), 6.78 (m, 2H), 5.75 (dd, *J* = 15.7, 6.2 Hz, 1H), 5.54 (dt, *J* = 15.5, 5.5 Hz, 1H), 5.41 (m, 2H), 4.62 (m, 2H), 4.55 (d, *J* = 11.0 Hz, 1H), 4.42 (d, *J* = 11.1 Hz, 1H), 4.16 (m, 2H), 3.91 (m, 1H), 3.75 (s, 3H), 3.56 (m 2H), 3.30 (dd, *J* = 13.4, 3.2 Hz, 1H), 3.15 (dd, *J* = 6.7, 2.2 Hz, 1H), 2.85 (m, 2H), 2.77 (m, 2H), 2.37 (m, 1H), 1.78 (m, 2H), 1.61 (m, 3H), 1.44 (m, 3H), 1.01 (d, *J* = 6.7 Hz, 3H), 0.96 (d, *J* = 7.1 Hz, 3H), 0.92 (m, 21H), 0.12 (s, 3H), 0.10 (s, 3H), 0.09 (s, 6H); <sup>13</sup>C NMR (75 MHz, CDCl<sub>3</sub>) δ 173.1, 158.7, 153.2, 144.3, 135.3, 134.7, 133.6, 132.5, 131.2, 129.3, 129.1, 128.8, 128.6, 127.6, 127.2, 126.7, 126.2, 113.4, 86.5, 85.8, 73.7, 72.7, 66.4, 65.9, 65.1, 55.0, 42.8, 42.4, 37.8, 35.5, 34.9, 33.5, 28.7, 26.0, 25.9, 18.2, 18.1, 14.5, 13.9, -2.9, -4.0, -4.2; LRMS (API-ESI) 1132.4 [M+K]<sup>+</sup>; HRMS (ESI) calcd for C<sub>67</sub>H<sub>91</sub>NO<sub>8</sub>Si<sub>2</sub>K 1132.5920 [M+K]<sup>+</sup>, found 1132.5874; [α]<sub>D</sub><sup>20</sup> +14.8 (*c* 0.61, CHCl<sub>3</sub>).

**4(R)-Benzyl-3-[9(S),11(S)-bis(*tert*-Butyldimethylsilanyloxy)-5(R)-(4-methoxybenzyloxy)-2(S),4(S),6(S),12(R)-tetramethyl-15-trityloxy-pentadeca-7,13-dienoyl]oxazolidin-2-one (22).**

NaHMDS (1.0 M in THF, 1.68 mL) was added at -78 °C to a solution of **21** (1.67 g) in THF (4 mL). After 30 min, the reaction mixture was treated with MeI (0.29 mL) at -78 °C, stirred for an additional 4 h, quenched with sat'd aqueous NH<sub>4</sub>Cl, and extracted with ether (2 x 10 mL). The combined organic layers were dried (MgSO<sub>4</sub>), concentrated and purified by flash column chromatography (EtOAc/hexane 1:9) to give **22** (1.05 g, 62 %) as a colorless oil: IR (CHCl<sub>3</sub>) 2957, 2929, 2856, 1783, 1697, 1513, 1449, 1385, 1249, 1074, 836, 774, 705 cm<sup>-1</sup>; <sup>1</sup>H NMR (300 MHz, CDCl<sub>3</sub>) δ 7.49 (m, 6H), 7.29 (m, 16H), 6.80 (m, 2H), 5.79 (dd, *J* = 15.6, 6.2 Hz, 1H), 5.56 (dt, *J* = 15.6, 5.7 Hz, 1H), 5.42 (m, 2H), 4.62 (m, 2H), 4.56 (d, *J* = 11.3 Hz, 1H), 4.37 (d, *J* = 11.1 Hz, 1H), 4.17 (m, 1H), 4.05 (m, 1H), 3.92 (m, 1H), 3.77 (s, 3H), 3.58 (d, *J* = 5.2 Hz, 1H), 3.27 (m, 1H), 3.08 (dd, *J* = 6.3, 2.5 Hz, 1H), 2.77 (m, 2H), 2.38 (m, 1H), 1.76 (m, 1H), 1.64 (m, 2H), 1.46 (m, 4H), 1.10 (d, *J* = 6.7 Hz, 3H), 1.00 (d, *J* = 6.3 Hz, 3H), 0.98 (d, *J* = 6.7 Hz, 3H), 0.93 (m, 21H), 0.14 (s, 3H), 0.11 (s, 6H), 0.10 (s, 3H); <sup>13</sup>C NMR (75 MHz, CDCl<sub>3</sub>) δ 177.3, 158.7, 152.8, 144.4, 135.3, 134.9, 133.6, 132.3, 131.3, 129.4, 128.9, 128.8, 128.6, 127.6, 127.2, 126.7, 126.3, 113.5, 86.6, 86.5, 74.0, 72.8, 66.5, 65.8, 65.2, 43.0, 42.5, 37.8, 35.4, 35.3, 33.0, 26.3, 26.0, 25.9, 18.3, 18.1, 17.4, 14.5, 14.2, -2.9, -4.0, -4.1, -4.2; LRMS (API-ESI) 1146.4 [M+K]<sup>+</sup>; HRMS (ESI) calcd for C<sub>68</sub>H<sub>93</sub>NO<sub>8</sub>Si<sub>2</sub>K 1146.6077 [M+K]<sup>+</sup>, found 1146.6079; [α]<sub>D</sub><sup>20</sup> +16.7 (*c* 1.1, CHCl<sub>3</sub>).

**9(S),11(S)-bis(*tert*-Butyldimethylsilyloxy)-5(R)-(4-methoxybenzyloxy)-2(S),4(S),6(S),12(R)-tetramethyl-15-trityloxypentadeca-7,13-dien-1-ol (23).**

MeOH (0.015 mL) and LiBH<sub>4</sub> (0.81 mL, 2.0 M soln in THF) were added to a stirred solution of **22** (0.41 g, 0.37 mmol) in THF (1.5 mL) at 0 °C dropwise. After stirring 2 h at 0 °C, saturated sodium potassium tartrate (10 mL) was added dropwise. The reaction mixture was warmed to room temperature and extracted with CH<sub>2</sub>Cl<sub>2</sub> (10 mL x 2). The combined organic layers were washed with brine (10 mL), dried over anhydrous MgSO<sub>4</sub>, and evaporated. The residue was chromatographed (hexane/EtOAc 4:1) to yield **23** (0.30 g, 87 %) as a colorless oil: IR (CHCl<sub>3</sub>) 3400, 2956, 2928, 2856, 1613, 1514, 1449, 1377, 1249, 1074, 836, 774, 706 cm<sup>-1</sup>; <sup>1</sup>H NMR (300 MHz, CDCl<sub>3</sub>) δ 7.48 (m, 6H), 7.29 (m, 11H), 6.84 (m, 2H), 5.78 (dd, *J* = 15.7, 6.0 Hz, 1H), 5.58 (dt, *J* = 15.7, 5.2 Hz, 1H), 5.46 (m, 1H), 5.35 (m, 1H), 4.59 (t, *J* = 9.5, Hz, 1H), 4.48 (q, *J* = 10.9 Hz, 2H), 3.92 (m, 1H), 3.79 (s, 3H), 3.57 (d, *J* = 5.5 Hz, 2H), 3.25 (m, 2H), 3.03 (t, *J* = 4.5 Hz, 1H), 2.75 (m, 1H), 2.41 (m, 1H), 1.75 (m, 1H), 1.55 (m, 2H), 1.32 (m, 2H), 1.17 (m, 2H), 1.07 (d, *J* = 6.7 Hz, 3H), 0.97 (d, *J* = 6.8 Hz, 3H), 0.94 (s, 9H), 0.91 (m, 12H), 0.72 (d, *J* = 6.6 Hz, 3H), 0.13 (s, 3H), 0.12 (s, 3H), 0.09 (s, 3H), 0.07 (s, 3H); <sup>13</sup>C NMR (75 MHz, CDCl<sub>3</sub>) δ 158.9, 144.4, 134.4, 133.4, 131.5, 131.4, 129.1, 128.7, 127.7, 126.8, 126.5, 113.6, 87.6, 86.8, 74.1, 73.0, 68.9, 66.5, 65.4, 55.2, 42.7, 42.4, 37.1, 35.0, 33.1, 26.0, 25.9, 18.9, 18.1, 15.8, 14.9, 14.7, -2.8, -4.0, -4.06, -4.10; LRMS (API-ESI) 973.5 [M+K]<sup>+</sup>; HRMS (ESI) calcd for C<sub>58</sub>H<sub>86</sub>O<sub>6</sub>Si<sub>2</sub>K 973.6301 [M+K]<sup>+</sup>, found 973.6264; [α]<sub>D</sub><sup>20</sup> -31.7 (*c* 1.3, CHCl<sub>3</sub>).

**13(S),15(S)-bis(*tert*-Butyldimethylsilyloxy)-2-[2-(4-methoxybenzyl)-5(S)-methyl-[1,3(S)]dioxan-4-yl]-9(R)-(4-methoxybenzyloxy)-6(S),8(S),10(S),16(R)-tetramethyl-19-trityloxynonadeca-4,11,17-trien-3-one (24).**

The alcohol **23** (0.30 g, 0.32 mmol) in CH<sub>2</sub>Cl<sub>2</sub> (10 mL) was treated with Dess-Martin periodinane (0.20 g, 0.47 mmol). After 1 h, the mixture was quenched with saturated NaHCO<sub>3</sub> (10 mL). The aqueous layer was extracted with ethyl ether (10 mL x 2) and the combined extracts were dried over anhydrous MgSO<sub>4</sub>. Filtration and concentration followed by short flash column chromatography filtration (hexane/EtOAc 4:1) to remove the residue from the Dess-Martin reagent provided crude aldehyde as a colorless oil, which was used for the next reaction without further purification. A mixture of ketophosphonate **7** (0.14 g) and Ba(OH)<sub>2</sub> (0.043 g, activated by heating to 100 °C for 1-2 h before use) in THF (2 mL) was stirred at room temperature for 30 min. A solution of the above aldehyde in wet THF (2 mL + 2 x 1 mL washings, 40:1 THF/H<sub>2</sub>O) was then added. After stirring for 12 h, the reaction mixture was diluted with Et<sub>2</sub>O (10 mL) and washed with sat'd NaHCO<sub>3</sub> (10 mL) and brine (10 mL). The organic solution was dried (MgSO<sub>4</sub>) and the solvent was evaporated *in vacuo*. The residue was chromatographed (hexane/EtOAc 9:2) to yield **24** (0.34 g, 90 %) as a colorless oil: IR (CHCl<sub>3</sub>) 2957, 2929, 2855, 1615, 1515, 1461, 1249, 1076, 1036, 835, 774 cm<sup>-1</sup>; <sup>1</sup>H NMR (300 MHz, CDCl<sub>3</sub>) δ 7.47 (m, 6H), 7.38 (m, 2H), 7.28 (m, 12H), 6.89 (m, 2H), 6.78 (m, 2H), 6.22 (d, *J* = 15.6 Hz, 1H), 5.74 (dd, *J* = 15.7, 6.2 Hz, 1H), 5.57 (m, 1H), 5.45 (s, 1H), 5.38 (m, 2H), 4.60 (m, 1H), 4.52 (d, *J* = 11.0 Hz, 1H), 4.33 (d, *J* = 11.0 Hz, 1H), 4.12 (dd, *J* = 11.2, 4.5 Hz, 1H), 3.90 (m, 2H), 3.81 (s, 3H), 3.76 (s, 3H), 3.55 (m, 3H), 3.04 (m, 1H), 2.92 (m, 1H), 2.75 (m, 1H), 2.36 (m, 1H), 2.25 (quint, *J* = 7.2 Hz, 1H), 2.02 (m, 1H), 1.71 (m, 1H), 1.56-1.33 (m, 4H), 1.25 (d, *J* = 6.9 Hz, 3H), 0.96 (d, *J* = 7.8 Hz, 3H), 0.95 (d, *J* = 7.1 Hz, 3H), 0.92 (m, 21H), 0.85 (d, *J* = 7.3 Hz, 3H); <sup>13</sup>C NMR (75 MHz, CDCl<sub>3</sub>) δ 201.1, 159.7, 158.8, 153.1, 144.3, 134.6, 133.6, 132.4, 131.2, 131.0, 129.1, 128.6, 127.7, 127.2, 126.8, 126.3, 126.0, 113.5, 113.4, 100.7, 86.6, 85.7, 82.8, 73.8, 72.8, 66.4, 65.2, 55.2, 47.0, 42.8, 42.4, 40.4, 35.5, 34.2, 32.8, 32.2, 26.0, 25.9, 19.2, 18.4, 18.3, 18.1, 14.5, 14.4, 12.4, 10.7, -2.9, -4.0, -4.1; LRMS (API-ESI) 1231.6 [M+K]<sup>+</sup>; HRMS (ESI) calcd for C<sub>74</sub>H<sub>104</sub>O<sub>9</sub>Si<sub>2</sub>K 1231.6856 [M+K]<sup>+</sup>, found 1231.6850; [α]<sub>D</sub><sup>20</sup> +22.8 (*c* 0.88, CHCl<sub>3</sub>).



**13(S),15(S)-bis(*tert*-Butyldimethylsilanyloxy)-2-[2-(4-methoxybenzyl)-5(S)-methyl-1,3(S)]dioxan-4-yl]-9(R)-(4-methoxybenzyloxy)-6(S),8(S),10(S),16(R)-tetramethyl-19-trityloxynonadeca-11,17-dien-3-one (25).**

NiCl<sub>2</sub>·6H<sub>2</sub>O (0.034 g, 0.14 mmol) then portionwise NaBH<sub>4</sub> (0.022 g, 0.58 mmol) were added to a stirred solution of unsaturated ketone **24** (0.34 g, 0.29 mmol) in MeOH (4 mL), THF (0.5 mL) at 0 °C. After 1 h, the reaction mixture was evaporated and filtered with celite eluting with Et<sub>2</sub>O (5 mL). The organic phase was concentrated and the residue was purified by flash chromatography (EtOAc/hexane 1:4) to yield 0.31 g of product **25** (89 %) as a colorless oil: IR (CHCl<sub>3</sub>) 2956, 2929, 2855, 1713, 1614, 1515, 1461, 1249, 1075, 1036, 835, 774, 706 cm<sup>-1</sup>; <sup>1</sup>H NMR (300 MHz, CDCl<sub>3</sub>) δ 7.47 (m, 6H), 7.29 (m, 13H), 6.87(m, 2H), 6.80 (m, 2H), 5.75 (dd, *J* = 15.7, 6.1 Hz, 1H), 5.55 (m, 1H), 5.45 (s, 1H), 5.38 (m, 2H), 4.60 (m, 1H), 4.48 (d, *J* = 10.9 Hz, 1H), 4.36 (d, *J* = 10.9 Hz, 1H), 4.13 (dd, *J* = 11.2, 4.4 Hz, 1H), 3.93 (m, 2H), 3.79 (s, 3H), 3.76 (s, 3H), 3.55 (m, 2H), 2.99 (m, 2H), 2.70 (m, 2H), 2.45 (t, *J* = 7.0 Hz, 1H), 2.36 (m, 1H), 2.02 (m, 1H), 1.75 (m, 1H), 1.63 (m, 1H), 1.49 (m, 2H), 1.37 (m, 3H), 1.23 (d, *J* = 7.1 Hz, 3H), 1.02 (d, *J* = 6.7 Hz, 3H), 0.95 (d, *J* = 7.0 Hz, 3H), 0.91 (m, 21H), 0.81 (d, *J* = 6.8 Hz, 3H), 0.80 (d, *J* = 6.7 Hz, 3H), 0.12 (s, 3H), 0.09 (s, 6H), 0.08 (s, 3H); <sup>13</sup>C NMR (75 MHz, CDCl<sub>3</sub>) δ 211.9, 159.8, 158.8, 144.6, 144.4, 134.9, 133.4, 132.3, 131.8, 131.5, 131.0, 129.0, 128.9, 128.7, 127.7, 127.6, 127.2, 126.8, 126.7, 126.3, 113.5, 100.8, 87.4, 86.7, 83.1, 74.0, 72.9, 66.6, 65.2, 55.22, 55.18, 48.3, 43.1, 42.5, 41.6, 38.3, 35.5, 32.7, 31.5, 31.3, 29.6, 26.1, 26.0, 19.0, 18.5, 18.1, 14.5, 14.1, 12.1, 9.7, -2.9, -4.0, -4.1, -4.2; LRMS (API-ESI) 1233.6 [M+K]<sup>+</sup>; HRMS (ESI) calcd for C<sub>74</sub>H<sub>108</sub>O<sub>9</sub>Si<sub>2</sub>K 1233.7013 [M+K]<sup>+</sup>, found 1233.7036; [α]<sub>D</sub><sup>20</sup> +3.0 (*c* 1.7, CHCl<sub>3</sub>).

**13(S),15(S)-bis(*tert*-Butyldimethylsilanyloxy)-2-[2-(4-methoxybenzyl)-5(S)-methyl-1,3(S)]dioxan-4-yl]-9(R)-(4-methoxybenzyloxy)-6(S),8(S),10(S),16(R)-tetramethyl-19-trityloxynonadeca-11,17-dien-3-ol (26).**

NaBH<sub>4</sub> (0.013 g, 0.34 mmol) was added to a solution of **25** (0.27 g, 0.23 mmol) in MeOH (4 mL) at 0 °C. After stirring for 2 h at 0 °C, the reaction mixture was evaporated and water (5 mL) was added. The reaction mixture was extracted with ether (2 x 20 mL) and washed with brine (10 mL), dried over MgSO<sub>4</sub> and concentrated *in vacuo*. The residue was purified by flash chromatography (EtOAc/hexane 2:9) to yield 0.19 g of major product **26β** (71 %, less polar) and 0.069 g (25 %, more polar) of minor product **26α** as a colorless oil: (**26β**) IR (CHCl<sub>3</sub>) 3533, 2956, 2929, 2855, 1614, 1515, 1462, 1250, 1072, 1036, 835, 774, 734 cm<sup>-1</sup>; <sup>1</sup>H NMR (300 MHz, CDCl<sub>3</sub>) δ 7.51 (m, 6H), 7.43 (m, 2H), 7.30 (m, 11H), 6.92 (m, 2H), 6.84 (m, 2H), 5.78 (dd, *J* = 15.6, 6.1 Hz, 1H), 5.61 (m, 1H), 5.57 (s, 1H), 5.43 (m, 2H), 4.65 (m, 1H), 4.55 (d, *J* = 11.0 Hz, 1H), 4.45 (d, *J* = 10.8 Hz, 1H), 4.18 (dd, *J* = 11.2, 4.5 Hz, 1H), 3.95 (m, 1H), 3.84 (s, 3H), 3.82 (m, 1H), 3.79 (s, 3H), 3.74 (m, 1H), 3.59 (m, 2H), 3.06 (m, 2H), 2.78 (m, 1H), 2.41 (m, 1H), 2.19 (m, 1H), 1.81 (m, 2H), 1.56 (dd, *J* = 13.8, 8.1 Hz, 3H), 1.44 (m, 3H), 1.34 (m, 3H), 1.08 (d, *J* = 7.0 Hz, 6H), 0.99 (d, *J* = 7.2 Hz, 3H), 0.96 (m, 18H), 0.90 (d, *J* = 6.7 Hz, 3H), 0.82 (d, *J* = 6.6 Hz, 6H), 0.16 (s, 3H), 0.14 (s, 6H), 0.13 (s, 3H); <sup>13</sup>C NMR (75 MHz, CDCl<sub>3</sub>) δ 160.0, 158.8, 144.6, 144.4, 134.9, 133.4, 132.3, 131.5, 130.7, 129.0, 128.9, 128.7, 127.7, 127.6, 127.2, 126.8, 126.7, 126.3, 113.7, 113.5, 89.0, 87.5, 86.7, 76.7, 74.0, 73.1, 72.8, 66.6, 65.2, 55.2, 55.1, 43.1, 42.5, 41.8, 37.4, 35.5, 34.4, 32.9, 32.4, 30.4, 30.1, 26.0, 25.9, 19.2, 18.5, 18.1, 14.5, 14.1, 11.9, 5.7, -2.9, -4.0, -4.1, -4.2; LRMS (API-ESI) 1235.6 [M+K]<sup>+</sup>; HRMS (ESI) calcd for C<sub>74</sub>H<sub>108</sub>O<sub>9</sub>Si<sub>2</sub>K 1235.7169 [M+K]<sup>+</sup>, found 1235.7149; [α]<sub>D</sub><sup>20</sup> +3.5 (*c* 0.6, CHCl<sub>3</sub>).

**5,15(S),17(S)-tris(*tert*-Butyldimethylsilanyloxy)-11(R)-(4-methoxybenzyloxy)-3(S)-[2-(4-methoxyphenyl)ethoxy]-2(S),4(R),8(S),10(S),12(S),18(R)-hexamethyl-21-trityloxy-heneicosa-13,19-dien-1-ol (27).**

A stirred solution of **26b** (0.19 g, 0.16 mmol) and 2,6-lutidine (0.037 mL, 0.32 mmol) in CH<sub>2</sub>Cl<sub>2</sub> (16 mL) at 0 °C was treated with TBSOTf (0.055 mL, 0.24 mmol). After stirring 2 h at ambient temperature, the reaction mixture was quenched by the addition of water (5 mL) and extracted by CH<sub>2</sub>Cl<sub>2</sub> and dried over MgSO<sub>4</sub>, followed by the evaporation of the solution under reduced pressure. The residue was purified by short column chromatography (hexane/EtOAc 9:1). To a stirred solution of TBS protected acetal (0.20 g, 0.15 mmol) in anhydrous CH<sub>2</sub>Cl<sub>2</sub> (3 mL) under an atmosphere of N<sub>2</sub> at 0 °C was added diisobutylaluminum hydride (1.0 M in THF, 1.5 mL, 1.5 mmol) dropwise. After stirring for additional 1 h at 0 °C, the reaction mixture was quenched by the careful addition of aqueous sat'd potassium sodium tartrate solution (10 mL), and stirred for 3 h at room temperature. The organic layer was separated, and the aqueous layer was extracted with CH<sub>2</sub>Cl<sub>2</sub> (20 mL). The combined organic layers were washed with brine and dried over MgSO<sub>4</sub> followed by the evaporation of the organic solution under reduced pressure. The residue was purified by column chromatography (EtOAc/hexane 1:4) to get **27** (0.19 g, 91 % for 2 steps) as a colorless oil: IR (CHCl<sub>3</sub>) 3466, 2955, 2928, 2856, 1613, 1514, 1462, 1249, 1072, 1037, 835, 773 cm<sup>-1</sup>; <sup>1</sup>H NMR (300 MHz, CDCl<sub>3</sub>) δ 7.52 (m, 6H), 7.30 (m, 13H), 6.94 (m, 2H), 6.85 (m, 2H), 5.79 (dd, *J* = 15.7, 6.3 Hz, 1H), 5.59 (dt, *J* = 15.7, 5.9 Hz, 1H), 5.44 (m, 2H), 4.67 (m, 1H), 4.60 (s, 2H), 4.57 (d, *J* = 11.1 Hz, 1H), 4.44 (d, *J* = 10.9 Hz, 1H), 3.97 (m, 1H), 3.91 (m, 1H), 3.85 (s, 3H), 3.79 (s, 3H), 3.68 (m, 2H), 3.60 (d, *J* = 5.6 Hz, 1H), 3.52 (dd, *J* = 6.6, 4.3 Hz, 1H), 3.07 (m, 2H), 2.97 (brs, 1H), 2.80 (dd, *J* = 14.5, 6.7 Hz, 1H), 2.40 (m, 1H), 2.02 (m, 1H), 1.95 (ddd, *J* = 9.6, 6.9, 4.0 Hz, 1H), 1.81 (m, 1H), 1.71 (m, 1H), 1.56 (m, 3H), 1.47 (m, 3H), 1.33 (m, 2H), 1.19 (d, *J* = 7.0 Hz, 3H), 1.08 (d, *J* = 6.7 Hz, 6H), 1.00 (s, 9H), 0.97 (m, 21H), 0.90 (d, *J* = 6.7 Hz, 3H), 0.82 (d, *J* = 6.4 Hz, 3H), 0.17 (s, 3H), 0.15 (s, 3H), 0.14 (s, 3H), 0.137 (s, 3H), 0.133 (s, 3H), 0.127 (s, 3H); <sup>13</sup>C NMR (75 MHz, CDCl<sub>3</sub>) δ 159.3, 158.8, 144.6, 144.4, 135.0, 133.6, 132.5, 131.4, 130.6, 129.2, 129.0, 128.9, 128.7, 127.7, 127.6, 126.8, 126.7, 126.3, 113.9, 113.5, 87.4, 86.7, 85.9, 75.3, 74.0, 73.6, 72.8, 66.6, 65.2, 65.1, 55.2, 55.1, 43.2, 42.5, 42.0, 41.5, 37.0, 35.6, 33.4, 32.9, 31.9, 30.1, 26.08, 26.05, 25.98, 19.4, 18.4, 18.1, 15.8, 14.4, 13.9, 10.0, -2.9, -3.7, -3.9, -4.1, -4.2, -4.4; LRMS (API-ESI) 1351.8 [M+K]<sup>+</sup>; HRMS (ESI) calcd for C<sub>80</sub>H<sub>124</sub>O<sub>9</sub>Si<sub>3</sub>K 1351.8190 [M+K]<sup>+</sup>, found 1351.8134; [α]<sub>D</sub><sup>20</sup> -6.1 (*c* 0.48, CHCl<sub>3</sub>).

**7,17(S),19(S)-tris(tert-Butyldimethylsilanyloxy)-5(S),13(R)-bis-(4-methoxybenzyloxy)-4(S),6(S),10(R),12(S),14(S),20(S)-hexamethyl-23-trityloxytetracos-1,3,15,21-tetraene (30).**

The alcohol **28** (0.17 g, 0.13 mmol) in CH<sub>2</sub>Cl<sub>2</sub> (5 mL) was treated with Dess-Martin periodinane (0.081 g, 0.2 mmol). After 1 h, the mixture was quenched with saturated NaHCO<sub>3</sub> (5 mL). The aqueous layer was extracted with ethyl ether (5 mL x 2) and the combined extracts were dried over anhydrous MgSO<sub>4</sub>. Filtration and concentration followed by short flash column chromatography filtration (hexane/EtOAc 9:2) to remove the residue from Dess-Martin reagent provided crude aldehyde as a colorless oil, which was used for the next reaction without further purification. To a stirred solution of the above crude aldehyde and 1-bromoallyl trimethylsilane **29** (0.16 g, 0.65 mmol) in anhydrous THF (3 mL) under an atmosphere of N<sub>2</sub> at room temperature was added CrCl<sub>2</sub> (0.13 g, 1.1 mmol) and the mixture was stirred for additional 14 h at ambient temperature. The reaction mixture was diluted with hexane followed by filtration through celite. After the evaporation of the solvent under reduced pressure, the residue was purified by short silica gel column chromatography (EtOAc/hexane 1:9). The foregoing product in THF (3 mL) was cooled to 0 °C and NaH (95 % w/w, 64 mg, 2.56 mmol) was added in one portion. The ice bath was removed after 15 min and the mixture was stirred for 2 h at ambient temperature. The reaction mixture was cooled to 0 °C, quenched with H<sub>2</sub>O (5 mL), and extracted with diethyl ether (5 mL x 2). The combined organic layer was washed with brine and dried over MgSO<sub>4</sub> followed by the evaporation of the organic solution under reduced pressure. The residue was purified by column chromatography (hexane/EtOAc 9:1) to get **30** (122 mg, 72 % for 3

steps) as a colorless oil: IR (CHCl<sub>3</sub>) 2955, 2928, 2856, 1613, 1514, 1462, 1249, 1072, 1039, 835, 773, 705 cm<sup>-1</sup>; <sup>1</sup>H NMR (300 MHz, CDCl<sub>3</sub>) δ 7.47 (m, 6H), 7.28 (m, 13H), 6.89 (m, 2H), 6.79 (m, 2H), 6.61 (ddd, *J* = 16.8, 10.7, 10.6 Hz, 1H), 6.04 (t, *J* = 10.8 Hz, 1H), 5.73 (dd, *J* = 15.6, 6.3 Hz, 1H), 5.61 (t, *J* = 10.4 Hz, 1H), 5.58 (m, 1H), 5.37 (m, 2H), 5.20 (d, *J* = 16.8 Hz, 1H), 5.11 (d, *J* = 10.1 Hz, 1H), 4.54 (m, 3H), 4.50 (d, *J* = 11.0 Hz, 1H), 4.37 (d, *J* = 10.8 Hz, 1H), 3.90 (m, 1H), 3.82 (s, 3H), 3.76 (s, 3H), 3.62 (m, 1H), 3.54 (d, *J* = 5.3 Hz, 1H), 3.35 (dd, *J* = 7.7, 3.1 Hz, 1H), 3.00 (m, 2H), 2.73 (m, 1H), 2.31 (m, 1H), 1.69 (m, 4H), 1.43 (m, 8H), 1.14 (d, *J* = 6.8 Hz, 3H), 1.00 (d, *J* = 7.1 Hz, 3H), 0.96 (s, 9H), 0.92 (s, 3H), 0.91 (s, 3H), 0.89 (m, 6H), 0.83 (d, *J* = 6.6 Hz, 3H), 0.72 (d, *J* = 6.4 Hz, 3H), 0.11 (s, 3H), 0.10 (s, 3H), 0.08 (s, 3H), 0.07 (s, 6H); <sup>13</sup>C NMR (75 MHz, CDCl<sub>3</sub>) δ 159.0, 158.8, 144.6, 144.4, 135.0, 134.6, 133.7, 133.4, 132.6, 132.4, 131.5, 131.4, 129.1, 129.0, 128.98, 128.94, 128.7, 127.7, 126.8, 126.3, 117.2, 113.7, 113.5, 87.3, 86.7, 84.3, 75.0, 74.0, 72.9, 72.8, 66.6, 65.2, 55.2, 55.1, 43.2, 42.6, 42.0, 40.6, 35.7, 35.3, 33.2, 32.8, 32.3, 30.1, 26.1, 26.0, 19.4, 18.8, 18.3, 18.2, 18.1, 14.4, 14.0, 13.9, -2.9, -3.6, -3.9, -4.1, -4.2, -4.4; [α]<sub>D</sub><sup>20</sup> +2.5 (*c* 1.2, CHCl<sub>3</sub>).

**7(*S*),9(*S*),19-tris-(*tert*-Butyldimethylsilanyloxy)-13(*R*),21(*S*)-bis-(4-methoxybenzyloxy)-6(*R*),12(*S*),14(*S*),16(*S*),20(*R*),22(*S*)-hexamethylhexacos-2,4,10,23,25-pentaenoic acid methyl ester (32).**

A solution of **30** (18.6 mg) in CH<sub>2</sub>Cl<sub>2</sub> (0.2 mL) was cooled to -78 °C and *B*-chlorocatecholborane (0.25 M in CH<sub>2</sub>Cl<sub>2</sub>, 0.17 mL) was added. The solution was stirred at -78 °C for 1 h followed by treatment with sat'd aqueous NaHCO<sub>3</sub> (1 mL). The resulting reaction mixture was then diluted with CH<sub>2</sub>Cl<sub>2</sub> (10 mL) and H<sub>2</sub>O (3 mL). The layers were separated and the aqueous layer was further extracted with CH<sub>2</sub>Cl<sub>2</sub> (2 x 5 mL). The combined organic layers were washed with brine, dried over MgSO<sub>4</sub> and concentrated under vacuum. The residue was purified by flash chromatography (hexane/EtOAc 4:1) on silica gel to yield **31** (9.4 mg) as a colorless oil. The alcohol **31** (20 mg, 0.018 mmol) in CH<sub>2</sub>Cl<sub>2</sub> (0.5 mL) was treated with Dess-Martin periodinane (12 mg, 0.028 mmol). After 1 h, the mixture was quenched with saturated NaHCO<sub>3</sub> (1 mL). The aqueous layer was extracted with ethyl ether (3 mL x 2) and the combined extracts were dried over anhydrous MgSO<sub>4</sub>. Filtration and concentration followed by short flash column chromatography filtration (hexane/EtOAc 9:2) to remove the residue from the Dess-Martin reagent provided crude aldehyde as a colorless oil, which was used for the next reaction without further purification. To a stirred solution of *bis*(2,2,2-trifluoroethyl)-(methoxycarbonylmethyl) phosphate (5.0 mL, 0.024 mmol), 18-crown-6 (0.024 g, 0.09 mmol) in THF (0.5 mL) cooled to -78 °C was added dropwise potassium *bis*(trimethylsilyl)amide (0.044 mL, 0.022 mmol, 0.5M solution in toluene). Thereafter the above aldehyde in THF (0.5 mL) was added and the solution was stirred for 6 h at -78 °C. The reaction mixture was quenched by addition of a sat'd NH<sub>4</sub>Cl solution (1 mL) and diluted with diethyl ether (5 mL). The layers were separated and organic phase was washed with brine (5 mL) and dried with MgSO<sub>4</sub>, filtered, and concentrated. The residue was purified by flash chromatography (EtOAc/hexane 1:9) to obtain (*E,Z*)-doubly unsaturated ester **32** (17 mg, 82 % for 2 steps) as a colorless oil: IR (CHCl<sub>3</sub>) 2956, 2929, 2856, 1720, 1613, 1514, 1462, 1249, 1173, 1075, 836, 773 cm<sup>-1</sup>; <sup>1</sup>H NMR (300 MHz, CDCl<sub>3</sub>) δ 7.22 (m, 5H), 6.82 (m, 4H), 6.55 (ddd, *J* = 16.8, 10.8, 10.8 Hz, 1H), 6.38 (t, *J* = 11.4 Hz, 1H), 6.05 (dd, *J* = 15.4, 6.2 Hz, 1H), 5.98 (t, *J* = 11.0 Hz, 1H), 5.55 (t, *J* = 10.5 Hz, 1H), 5.48 (d, *J* = 11.5 Hz, 1H), 5.31 (m, 2H), 5.14 (d, *J* = 16.8 Hz, 1H), 5.05 (d, *J* = 10.1 Hz, 1H), 4.54 (m, 1H), 4.49 (m, 3H), 4.31 (d, *J* = 10.9 Hz, 1H), 3.87 (m, 1H), 3.77 (s, 3H), 3.75 (s, 3H), 3.68 (s, 3H), 3.57 (m, 1H), 3.29 (dd, *J* = 7.7, 3.1 Hz, 1H), 2.94 (m, 2H), 2.68 (m, 1H), 2.48 (m, 1H), 1.65 (m, 3H), 1.43-1.28 (m, 6H), 1.20 (m, 2H), 1.08 (d, *J* = 6.8 Hz, 3H), 0.96 (d, *J* = 6.9 Hz, 3H), 0.94 (d, *J* = 6.1 Hz, 3H), 0.90 (s, 9H), 0.86 (m, 21H), 0.81 (d, *J* = 6.7 Hz, 3H), 0.71 (d, *J* = 6.4 Hz, 3H), 0.06 (s, 3H), 0.05 (s, 3H), 0.04 (s, 3H), 0.02 (s, 6H); <sup>13</sup>C NMR (75 MHz, CDCl<sub>3</sub>) δ 166.9, 159.0,

158.8, 147.7, 146.9, 145.8, 134.6, 133.5, 132.7, 132.5, 131.6, 131.4, 129.1, 128.9, 128.8, 128.7, 128.4, 127.9, 127.7, 127.3, 126.4, 117.2, 114.9, 113.7, 113.6, 87.6, 84.3, 77.2, 74.9, 74.2, 72.9, 72.7, 66.4, 55.3, 55.2, 50.9, 43.1, 42.5, 42.1, 40.6, 35.8, 35.3, 33.6, 33.2, 32.9, 18.14, 18.11, 14.6, 13.9, 9.3, -2.9, -3.6, -3.9, -4.1, -4.4; LRMS (API-ESI) 1185.7 [M+K]<sup>+</sup>; HRMS (ESI) calcd for C<sub>67</sub>H<sub>114</sub>O<sub>9</sub>Si<sub>3</sub>K 1185.7408 [M+K]<sup>+</sup>, found 1185.7464; [ $\alpha$ ]<sub>D</sub><sup>20</sup> -12.6 (*c* 0.75, CHCl<sub>3</sub>).

**8(S),10(S),14(R),20(R)-Tetrahydroxy-7(S),13(S),15(S),17(R),21(S)-pentamethyl-22(S)-(1(S)-methylpenta-2,4-dienyl)oxacyclodocosa-3,5,11-trien-2-one (5).**

The ester **32** (8.5 mg, 7.4  $\mu$ mol) was added to CH<sub>2</sub>Cl<sub>2</sub> (1 mL) and H<sub>2</sub>O (0.05 mL) and DDQ (5.0 mg, 22  $\mu$ mol) was added at 0 °C. After 1 h of stirring at 0 °C, the reaction mixture was quenched by adding sat'd NaHCO<sub>3</sub> (5 mL). The organic phase was washed by sat'd NaHCO<sub>3</sub> solution (3 x 10 mL) and brine, dried over MgSO<sub>4</sub> and concentrated. Purification by flash column chromatography (EtOAc/hexane 2:9) furnished diol **33** (6.4 mg, 95%) as a colorless oil. To the stirred solution of the above diol (6.4 mg, 7.06  $\mu$ mol) in EtOH (0.7 mL) was added 1N aqueous KOH solution (0.07 mL) and the mixture was refluxed gently until the ester disappeared (about 7 h) as determined by TLC analysis. The ethanolic solution was concentrated and then diluted with ether (4 mL). After the solution was acidified to pH3 with 1N HCl solution, the organic phase was separated and aqueous phase was extracted with EtOAc (2 x 2 mL). The combined organic phases were dried with MgSO<sub>4</sub>, concentrated and **34** was used without further purification. A solution of above dihydroxy acid in THF (0.5 mL) was treated at 0 °C with Et<sub>3</sub>N (0.006 mL, 43  $\mu$ mol) and 2,4,6-trichlorobenzoyl chloride (0.0055 mL, 35  $\mu$ mol). The reaction mixture was stirred at 0 °C for 30 min and then added to a 4-DMAP (3.5 mL, 0.02 M solution in toluene) at 25 °C. After stirring for 12 h, the reaction mixture was concentrated, EtOAc (5 mL) was added and the organic phase was washed with 1N HCl (2 x 5 mL), and dried over MgSO<sub>4</sub>. Purification by flash column chromatography (EtOAc/hexane 1:9) furnished macrolactone **5** (3.0 mg, 49 % for 2 steps) as a colorless oil. To a stirred solution of the above macrolactone (2.7 mg, 3.1  $\mu$ mol) in MeOH (0.5 mL) at 0 °C was added 1.0 mL of 3 N HCl (prepared by adding 0.25 mL of conc. HCl to 0.75 mL MeOH). After 2 h at room temperature, the reaction mixture was diluted with EtOAc (2 mL) and H<sub>2</sub>O (2 mL) and the organic phase was separated and aqueous phase was extracted with EtOAc (2 x 2 mL). The combined organic phase was washed with sat'd NaHCO<sub>3</sub> (5 mL), dried with MgSO<sub>4</sub>, concentrated and the residue was purified by flash chromatography (EtOAc/hexane 1:1) to yield **5** (1.2 mg, 73 %) as a colorless oil: IR (CHCl<sub>3</sub>) 3400, 2960, 2926, 2854, 1693, 1635, 1599, 1461, 1378, 1277, 1183, 1075, 964 cm<sup>-1</sup>; <sup>1</sup>H NMR (500 MHz, CD<sub>3</sub>OD)  $\delta$  7.34 (dd, *J* = 15.3, 11.3 Hz, 1H), 6.64 (ddd, *J* = 16.9, 10.5, 10.3 Hz, 1H), 6.57 (t, *J* = 11.4 Hz, 1H), 5.96 (t, *J* = 10.9 Hz, 1H), \*5.95 (dd, *J* = 15.3, 8.3 Hz, 1H), \*5.48 (t, *J* = 10.0 Hz, 1H), \*5.47 (d, *J* = 11.6 Hz, 1H), 5.38 (dd, *J* = 11.1, 8.9 Hz, 1H), 5.27 (t, *J* = 10.5 Hz, 1H), 5.16 (d, *J* = 16.9 Hz, 1H), 5.08 (d, *J* = 10.2 Hz, 1H), 5.02 (dd, *J* = 8.0, 3.5 Hz, 1H), 4.65 (dt, *J* = 3.1, 8.4 Hz, 1H), \*3.72 (ddd, *J* = 9.0, 6.3, 2.8 Hz, 1H), \*3.25 (ddd, *J* = 10.2, 7.4, 2.8 Hz, 1H), \*3.16 (dd, *J* = 6.7, 4.5 Hz, 1H), 3.06 (dd, *J* = 16.3, 8.3 Hz, 1H), \*2.72 (ddd, *J* = 10.2, 6.7, 6.6 Hz, 1H), 2.36 (dd, *J* = 14.7, 7.2 Hz, 1H), 1.86 (m, 1H), 1.81 (dt, *J* = 6.8, 3.7 Hz, 1H), 1.69 (m, 2H), 1.58 (m, 1H), 1.47 (ddd, *J* = 13.8, 9.5, 3.5 Hz, 1H), 1.37 (m, 1H), 1.25 (m, 1H), 1.17 (m, 1H), 1.13 (m, 1H), 1.09 (d, *J* = 6.8 Hz, 3H), 1.03 (d, *J* = 6.9 Hz, 6H), 0.98 (d, *J* = 6.7 Hz, 3H), 0.87 (d, *J* = 6.7 Hz, 3H), 0.76 (d, *J* = 6.4 Hz, 3H) (\*coupling constants were measured in CDCl<sub>3</sub>); <sup>13</sup>C NMR (125 MHz, CDCl<sub>3</sub>)  $\delta$  166.3, 147.2, 145.3, 134.39, 134.37, 132.5, 132.3, 130.0, 127.6, 117.8, 116.5, 80.0, 75.4, 74.9, 72.0, 66.2, 43.2, 41.5, 40.7, 40.6, 35.6, 35.4, 35.0, 33.0, 31.2, 30.4, 20.4, 18.1, 17.3, 16.2, 12.4, 10.2; LRMS (API-ESI) 571.3 [M+K]<sup>+</sup>; HRMS (ESI) calcd for C<sub>32</sub>H<sub>52</sub>O<sub>6</sub>K 571.3401 [M+K]<sup>+</sup>, found 571.3397; [ $\alpha$ ]<sub>D</sub><sup>20</sup> +32.6 (*c* 0.10, MeOH).

**Synthesis of 6,14-bis, *epi*-dictyostatin****(*S*)-4-Benzyl-3-[(2*R*,3*S*)-3-hydroxy-2,4-dimethylpent-4-enoyl]oxazolidin-2-one 41.**

A solution of **40** in ethyl acetate (185 mL) was treated with MgCl<sub>2</sub> (0.35 g, 3.67 mmol), NaSbF<sub>6</sub> (2.85 g, 11.01 mmol), triethylamine (10.2 mL, 73.4 mmol), methacrolein (4.6 mL, 44.04 mmol), and TMSCl (7.0 mL, 55.05 mmol). The mixture was stirred at room temperature for three days, and filtered through a pad of silica gel. The filtrate was evaporated under vacuum. The residue was dissolved in a solution of MeOH (200 mL) and TFA (1 mL). The mixture was stirred at room temperature for 1 h. The solvent was removed under vacuum to provide the brown oil. The flash chromatography (CH<sub>2</sub>Cl<sub>2</sub>:EtOAc, 49:1) afforded the title compound (9.62 g, 86% yield): <sup>1</sup>H NMR (300 MHz, CDCl<sub>3</sub>) δ 7.40-7.18 (m, 5H), 5.11 (d, *J* = 16.2 Hz, 2H), 4.79 (m, 1H), 4.31-4.09 (m, 4H), 3.41 (dd, *J* = 3.3, 13.5 Hz, 1H), 2.99-2.82 (m, 2H), 1.89 (s, 3H), 1.24 (d, *J* = 6.9 Hz, 3H).

**(2*S*,4*S*,5*S*)-2-(4-Methoxyphenyl)-5-methyl-4-(prop-1-en-2-yl)-1,3-dioxane (42).**

A solution of **41** (11.62 g, 38.3 mmol) in THF (150 mL) and MeOH (1.7 mL) was treated with a solution of LiBH<sub>4</sub> (2.0 M in THF, 23.0 mL, 46.0 mmol) at 0 °C. The mixture was stirred at 0 °C for 1 h, then let to warm to room temperature over 1 h. The mixture was quenched with sat. aq. sodium potassium tartrate, then diluted with ethyl ether and water. The aqueous layer was extracted with ethyl ether (2 × 75 mL). The combined organic layers were dried over anhydrous MgSO<sub>4</sub>. The solvent was removed under vacuum to provide the oil. The flash chromatography (CH<sub>2</sub>Cl<sub>2</sub>:EtOAc, 19:1 to 3:2) afforded the diol (3.63 g, 73% yield): <sup>1</sup>H NMR (300 MHz, CDCl<sub>3</sub>) δ 5.04 (d, *J* = 14.7 Hz, 2H), 4.08 (dd, *J* = 2.7, 8.4 Hz, 1H), 3.82-3.68 (m, 2H), 2.94 (dd, *J* = 3.9, 6.9 Hz, 1H), 2.58 (d, *J* = 2.7 Hz, 1H), 1.99 (m, 1H), 1.82 (s, 3H), 0.89 (d, *J* = 6.9 Hz, 3H).

A solution of the diol (3.61 g 27.7 mmol) and PMB dimethyl acetal (4.95 mL, 29.0 mmol) in toluene (35 mL) was treated with PPTS (0.69 g, 2.77 mmol) at room temperature. The mixture was stirred at room temperature overnight. The mixture was quenched with sat. aq. NaHCO<sub>3</sub>, then diluted with ethyl ether. The organic layer was washed with water and brine, then dried over anhydrous Na<sub>2</sub>SO<sub>4</sub>. The solvent was removed under vacuum to provide the crude mixture **42**, which was used without purification for the next reaction: <sup>1</sup>H NMR (300 MHz, CDCl<sub>3</sub>) δ 7.52 (d, *J* = 8.4 Hz, 2H), 6.97 (d, *J* = 8.7 Hz, 2H), 5.59 (s, 1H), 5.07 (dd, *J* = 0.9, 4.2 Hz, 2H), 4.28 (dd, *J* = 4.8, 11.4 Hz, 1H), 3.98-3.88 (m, 4H), 3.62 (t, *J* = 11.4 Hz, 1H), 2.15 (m, 1H), 1.90 (d, *J* = 0.9 Hz, 3H), 0.81 (d, *J* = 5.7 Hz, 3H).

**(*R*)-2-[(2*S*,4*R*,5*S*)-2-(4-Methoxyphenyl)-5-methyl-1,3-dioxan-4-yl]propan-1-ol (43).**

A solution of cyclohexene (8.7 mL, 85.8 mmol) in THF (100 mL) was treated with BH<sub>3</sub>•DMS (10.0 M in THF, 4.3 mL, 42.9 mmol) dropwise at 0 °C. The solution was stirred at 0 °C for 1 h. The white precipitates formed. A solution of the crude **42** in THF (2 mL) was added dropwise. The mixture was warmed to room temperature over 3 h, and cooled to 0 °C, then treated with water (3 mL), 3N NaOH (1 mL), and H<sub>2</sub>O<sub>2</sub> (1 mL). The mixture was stirred at 0 °C for 20 min, at room temperature for 20 min, and at 50 °C for 20 min. The mixture was cooled to room temperature, and diluted with ethyl ether. The aqueous layer was extracted with ethyl ether (3 × 50 mL). The combined organic layers were washed with brine, and dried over anhydrous Na<sub>2</sub>SO<sub>4</sub>. The solvent was removed under vacuum to provide the oil. The flash chromatography (CH<sub>2</sub>Cl<sub>2</sub>:EtOAc, 17:3) afforded the title compound (5.61 g, 76% yield, two steps): IR (NaCl) 3426, 2961, 2932, 1517, 1249, 1032 cm<sup>-1</sup>; <sup>1</sup>H NMR (300 MHz, CDCl<sub>3</sub>) δ 7.42 (d, *J* = 8.4 Hz, 2H), 6.93 (d, *J* = 8.7 Hz, 2H), 5.41 (s, 1H), 4.19 (dd, *J* = 4.8, 11.4 Hz, 1H), 3.99 (dd, *J* = 3.6, 11.1 Hz, 1H), 3.83 (s, 3H), 3.67 (dd, *J* = 4.5, 8.4 Hz, 1H), 3.59-3.45 (m, 2H), 2.42 (brs, 1H), 2.18

(m, 1H), 2.01 (m, 1H), 1.24 (d,  $J = 7.2$  Hz, 3H), 0.84 (d,  $J = 6.6$  Hz, 3H); LRMS (EI) 266 ( $M^{+}$ ); HRMS (EI) calcd for  $C_{15}H_{22}O_4$  266.1518 ( $M^{+}$ ), found 266.1512.

**(2S,4S,5S)-4-[(S)-1-Iodopropan-2-yl]-2-(4-methoxyphenyl)-5-methyl-1,3-dioxane (44).**

To a solution of  $PPh_3$  (2.44 g, 9.05 mmol) in  $CH_2Cl_2$  (25 mL) was added imidazole (0.77 g, 11.31 mmol) and iodine (2.58 g, 10.18 mmol) at room temperature. The mixture was vigorously stirred until dissolution of iodine. A solution of **43** (2.00 g, 7.54 mmol) in  $CH_2Cl_2$  (5 mL) was added dropwise. The mixture was stirred at room temperature for 20 h, then concentrated under vacuum. The residue was dissolved in a minimum amount of  $CH_2Cl_2$  and purified by flash chromatography (hexane/EtOAc, 4:1) afforded the title compound (2.79 g, 98% yield):  $^1H$  NMR (300 MHz,  $CDCl_3$ )  $\delta$  7.42 (d,  $J = 8.4$  Hz, 2H), 6.92 (d,  $J = 8.4$  Hz, 2H), 5.43 (s, 1H), 4.14 (dd,  $J = 4.8, 11.4$  Hz, 1H), 3.81 (s, 3H), 3.58-3.37 (m, 3H), 3.12 (t,  $J = 9.9$  Hz, 1H), 2.16 (m, 2H), 1.28 (d,  $J = 6.3$  Hz, 3H), 0.83 (d,  $J = 6.6$  Hz, 3H);  $^{13}C$  NMR (75 MHz,  $CDCl_3$ )  $\delta$  159.9, 131.2, 127.3, 113.6, 101.1, 86.1, 73.0, 55.4, 38.0, 31.3, 19.0, 12.5, 9.6; LRMS (EI) 376 ( $M^{+}$ ); HRMS (EI) calcd for  $C_{15}H_{21}O_3I$  376.0533 ( $M^{+}$ ), found 376.0535.

**(2R,4R)-N-[(1S,2S)-1-Hydroxy-1-phenylpropan-2-yl]-4-[(2S,4R,5S)-2-(4-methoxyphenyl)-5-methyl-1,3-dioxan-4-yl]-N,2-dimethylpentanamide (46).**

A suspension of LiCl (3.99 g, 94.2 mmol) and diisopropylamine (4.50 mL, 31.8 mmol) in THF (15 mL) was treated with BuLi (1.6 M in hexane, 11.8 mL, 29.5 mmol) at  $-78$  °C dropwise. The mixture was stirred at  $-78$  °C for 10 min and at 0 °C for 5 min, then cooled to  $-78$  °C. A solution of **45** (3.44 g, 15.6 mmol) in THF (30 mL) was added dropwise. The mixture was stirred at  $-78$  °C for 1h, 0 °C for 15 min, and at room temperature for 5 min, then cooled to 0 °C. A solution of **44** (2.79 g, 7.4 mmol) in THF (10 mL) was added. The mixture was allowed to warm to room temperature and stirred for 36 h. The reaction mixture was quenched with half sat. aq.  $NH_4Cl$  and extracted with ethyl acetate. The combined organic layers were dried over anhydrous  $Na_2SO_4$ . The solvent was removed under vacuum to provide the oil. The flash chromatography (hexane:EtOAc, 2:3) afforded the title compound (3.07 g, 88% yield): IR (NaCl) 3380, 2962, 2932, 2874, 2836, 1614, 1249, 1033  $cm^{-1}$ ; LRMS (EI) 468 ( $M^{+}$ ); HRMS (EI) calcd for  $C_{28}H_{38}NO_5$  468.2759 ( $M^{+}$ ), found 468.2750.

**(2R,4R)-4-[(2S,4R,5S)-2-(4-Methoxyphenyl)-5-methyl-1,3-dioxan-4-yl]-2-methylpentan-1-ol (47).**

A solution of diisopropylamine (2.70 mL, 26.5 mmol) in THF (20 mL) was treated with BuLi (1.6 M in hexane, 15.4 mL, 24.6 mmol) at  $-78$  °C dropwise. The mixture was stirred at  $-78$  °C for 10 min and at 0 °C for 10 min.  $BH_3 \cdot NH_3$  (0.87 g, 25.3 mmol) was added. The mixture was stirred at 0 °C for 15 min and at room temperature for 15 min, then cooled to 0 °C. A solution of **46** (2.97 g, 6.32 mmol) in THF (10 mL) was added. The mixture was warmed to room temperature and stirred for 2 h. The reaction mixture was quenched with half sat. aq.  $NH_4Cl$  and extracted with ethyl ether. The combined organic layers were dried over anhydrous  $Na_2SO_4$ . The solvent was removed under vacuum to provide the oil. Flash chromatography (hexane:EtOAc, 7:3) afforded the title compound (1.54 g, 79% yield): IR (NaCl) 3415, 2958, 2929, 2873, 2836, 1517, 1249, 1033  $cm^{-1}$ ;  $^1H$  NMR (300 MHz,  $CDCl_3$ )  $\delta$  7.42 (d,  $J = 8.7$  Hz, 2H), 6.90 (d,  $J = 8.4$  Hz, 2H), 5.43 (s, 1H), 4.12 (dd,  $J = 4.5, 11.1$  Hz, 1H), 3.80 (s, 3H), 3.57-3.33 (m, 4H), 2.06 (m, 1H), 1.91 (m, 1H), 1.70 (m, 1H), 1.43 (m, 1H), 1.24 (m, 1H), 1.06 (d,  $J = 6.6$  Hz, 3H), 0.92 (d,  $J = 6.6$  Hz, 3H), 0.77 (d,  $J = 6.6$  Hz, 3H);  $^{13}C$  NMR (75 MHz,  $CDCl_3$ )  $\delta$  159.8, 131.6, 127.3, 113.5, 101.2, 88.0, 73.2, 69.4, 55.3, 33.3, 32.8, 30.9, 30.5, 17.1, 15.8, 12.2; LRMS (EI) 308 ( $M^{+}$ ); HRMS (EI) calcd for  $C_{18}H_{28}O_4$  308.1991 ( $M^{+}$ ), found 308.1987.

***tert*-Butyl{(2*R*,4*R*)-4-[(2*S*,4*R*,5*S*)-2-(4-methoxyphenyl)-5-methyl-1,3-dioxan-4-yl]-2-methylpentyloxy}dimethylsilane (48).**

A solution of **47** (1.52 g, 4.92 mmol), imidazole (0.67 g, 9.84 mmol) and DMAP (0.03 g, 0.25 mmol) in CH<sub>2</sub>Cl<sub>2</sub> (20 mL) was treated with TBDMSCl (1.11 g, 7.38 mmol) at 0 °C. The white suspension was stirred at room temperature for 3 h, then diluted with CH<sub>2</sub>Cl<sub>2</sub> and brine. The aqueous layer was extracted with CH<sub>2</sub>Cl<sub>2</sub>. The combined organic layers were dried over anhydrous MgSO<sub>4</sub>. The solvent was removed under vacuum to provide the crude oil (1.95 g, 94% yield): IR (NaCl) 2955, 2928, 2855, 1249, 1093, 834 cm<sup>-1</sup>; <sup>1</sup>H NMR (300 MHz, CDCl<sub>3</sub>) δ 7.53 (d, *J* = 8.1 Hz, 2H), 6.99 (d, *J* = 8.1 Hz, 2H), 5.53 (s, 1H), 4.21 (dd, *J* = 4.8, 15.9 Hz, 1H), 3.83 (s, 3H), 3.70-3.42 (m, 4H), 2.15 (m, 1H), 2.00 (m, 1H), 1.78 (m, 1H), 1.56 (m, 1H), 1.27 (m, 1H), 1.15 (d, *J* = 6.9 Hz, 3H), 1.02 (s, 9H), 0.99 (d, *J* = 7.2 Hz, 3H), 0.87 (d, *J* = 6.9 Hz, 3H), 0.16 (s, 6H); <sup>13</sup>C NMR (75 MHz, CDCl<sub>3</sub>) δ 159.8, 131.8, 127.4, 113.5, 101.2, 88.1, 73.2, 69.4, 55.3, 33.4, 32.9, 31.0, 30.5, 26.1, 18.4, 17.1, 15.9, 12.2, -5.1; LRMS (EI) 422 (M<sup>+</sup>); HRMS (EI) calcd for C<sub>24</sub>H<sub>42</sub>O<sub>4</sub>Si 422.2841 (M<sup>+</sup>), found 422.2852.

**(2*S*,3*R*,4*R*,6*R*)-3-(4-Methoxybenzyloxy)-7-(*tert*-butyldimethylsilyloxy)-2,4,6-trimethylheptan-1-ol (49).**

A solution of **48** (1.59 g, 3.77 mmol) in CH<sub>2</sub>Cl<sub>2</sub> (30 mL) was treated with DIBALH (1.0 M in hexane, 17.0 mL, 17.0 mmol) at -78 °C dropwise. The mixture was stirred at -78 °C for 15 min and at 0 °C for 20 min. The reaction mixture was quenched with sat. aq. sodium potassium tartrate, diluted with ethyl ether and water, then stirred vigorously until the phases were clear. The aqueous layer was extracted with ethyl ether. The combined organic layers were dried over anhydrous MgSO<sub>4</sub>. The solvent was removed under vacuum to provide the oil. The flash chromatography (hexane:EtOAc, 7:3) afforded the title compound (1.23 g, 77% yield): IR (NaCl) 3453, 2956, 2928, 2856, 1514, 1249, 1089, 836 cm<sup>-1</sup>; <sup>1</sup>H NMR (300 MHz, CDCl<sub>3</sub>) δ 7.36 (d, *J* = 8.4 Hz, 2H), 6.97 (d, *J* = 8.7 Hz, 2H), 4.70 (d, *J* = 10.5 Hz, 1H), 4.56 (d, *J* = 10.5 Hz, 1H), 3.88 (s, 3H), 3.82 (dd, *J* = 3.6, 11.1 Hz, 1H), 3.65 (dd, *J* = 5.7, 10.8 Hz, 1H), 3.51 (dd, *J* = 6.3, 9.9 Hz, 1H), 3.43 (dd, *J* = 6.3, 9.9 Hz, 1H), 3.30 (dd, *J* = 4.5, 6.6 Hz, 1H), 2.88 (brs, 1H), 1.99 (m, 2H), 1.77 (m, 1H), 1.50-1.25 (m, 2H), 1.08 (d, *J* = 6.9 Hz, 3H), 1.06 (d, *J* = 7.2 Hz, 3H), 0.99 (s, 9H), 0.92 (d, *J* = 6.9 Hz, 3H), 0.13 (s, 6H); <sup>13</sup>C NMR (75 MHz, CDCl<sub>3</sub>) δ 159.4, 130.6, 129.4, 113.9, 90.1, 74.9, 69.4, 66.5, 55.3, 37.4, 35.0, 33.4, 33.3, 26.1, 18.4, 17.0, 16.1, 15.9, -5.1; LRMS (ESI) 447.2 [M+Na]<sup>+</sup>; HRMS (ESI) calcd for C<sub>24</sub>H<sub>45</sub>O<sub>4</sub>Si 425.3087 [M+H]<sup>+</sup>, found 425.3060.

**[(2*R*,4*R*,5*R*,6*S*)-5-(4-Methoxybenzyloxy)-2,4,6-trimethyloct-7-ynyloxy](*tert*-butyl)dimethylsilane (38).**

A solution of **49** (0.54 g, 1.26 mmol) in CH<sub>2</sub>Cl<sub>2</sub> (25 mL) was treated with Dess-Martin periodinane (1.07 g, 2.52 mmol) at room temperature. The mixture was stirred for 2 h. The reaction mixture was quenched with sat. aq. NaHCO<sub>3</sub>. The aqueous layer was extracted with ethyl ether. The combined organic layers were dried over anhydrous MgSO<sub>4</sub>. The solvent was removed under vacuum to provide the oil, which was used for the next reaction without further purification.

A solution of CBr<sub>4</sub> (0.84 g, 2.52 mmol) in CH<sub>2</sub>Cl<sub>2</sub> (3 mL) was treated with PPh<sub>3</sub> (1.36 g, 5.05 mmol) at 0 °C. The mixture was stirred until the formation of precipitates. A solution of the crude aldehyde and 2,6-lutidine (0.29 mL, 2.52 mmol) was added at 0 °C. The mixture was stirred at 0 °C for 2 h. The reaction mixture was quenched with water. The aqueous layer was extracted with ethyl ether. The combined organic layers were dried over anhydrous MgSO<sub>4</sub>. The solvent was removed under vacuum to provide the oil. The flash chromatography (hexane:EtOAc, 9:1) afforded the dibromoalkene (0.58 g, 79% yield, two steps): IR (NaCl) 2955,

2928, 1514, 1249, 1092, 836  $\text{cm}^{-1}$ ;  $^1\text{H}$  NMR (300 MHz,  $\text{CDCl}_3$ )  $\delta$  7.32 (d,  $J = 8.7$  Hz, 2H), 6.94 (d,  $J = 8.7$  Hz, 2H), 6.60 (d,  $J = 9.6$  Hz, 1H), 4.60 (d,  $J = 10.8$  Hz, 1H), 4.51 (d,  $J = 10.8$  Hz, 1H), 3.85 (s, 3H), 3.48 (dd,  $J = 6.3, 9.9$  Hz, 1H), 3.39 (dd,  $J = 6.3, 9.9$  Hz, 1H), 3.12 (dd,  $J = 3.0, 6.3$  Hz, 1H), 2.79 (m, 1H), 1.77 (m, 2H), 1.29 (m, 2H), 1.13 (d,  $J = 6.9$  Hz, 3H), 0.94 (s, 9H), 0.92 (d,  $J = 6.6$  Hz, 3H), 0.89 (d,  $J = 6.6$  Hz, 3H), 0.09 (s, 6H);  $^{13}\text{C}$  NMR (75 MHz,  $\text{CDCl}_3$ )  $\delta$  159.2, 141.2, 131.0, 129.3, 113.8, 87.6, 87.3, 74.3, 69.4, 55.4, 41.1, 36.2, 33.7, 33.4, 26.1, 18.5, 17.6, 16.1, 15.7, -5.1; LRMS (EI) 578 ( $\text{M}^+$ ); HRMS (EI) calcd for  $\text{C}_{25}\text{H}_{42}\text{Br}_2\text{O}_3\text{Si}$  576.1279 ( $\text{M}^+$ ), found 576.1270.

A solution of the dibromoalkene (0.46 g, 0.80 mmol) in THF (5 mL) was treated with BuLi (1.6 M in hexane, 1.50 mL, 2.40 mmol) at  $-78$  °C dropwise. The mixture was stirred at  $-78$  °C for 40 min. The reaction mixture was quenched with sat. aq.  $\text{NH}_4\text{Cl}$ . The aqueous layer was extracted with ethyl ether. The combined organic layers were dried over anhydrous  $\text{MgSO}_4$ . The solvent was removed under vacuum to provide the oil. Flash chromatography (hexane:EtOAc, 9:1) afforded the title compound (0.32 g, 96% yield):  $^1\text{H}$  NMR (300 MHz,  $\text{CDCl}_3$ )  $\delta$  7.32 (d,  $J = 8.5$  Hz, 2H), 6.88 (d,  $J = 8.6$  Hz, 2H), 4.70 (d,  $J = 10.8$  Hz, 1H), 4.58 (d,  $J = 10.8$  Hz, 1H), 3.81 (s, 3H), 3.44 (dd,  $J = 6.3, 9.6$  Hz, 1H), 3.32 (dd,  $J = 6.3, 9.0$  Hz, 1H), 3.11 (t,  $J = 5.7$  Hz, 1H), 2.79 (m, 1H), 2.09 (d,  $J = 2.4$  Hz, 1H), 1.93 (m, 1H), 1.69 (m, 1H), 1.24 (d,  $J = 6.9$  Hz, 3H), 0.97 (d,  $J = 6.6$  Hz, 3H), 0.90 (s, 9H), 0.85 (d,  $J = 6.6$  Hz, 3H), 0.04 (s, 6H);  $^{13}\text{C}$  NMR (75 MHz,  $\text{CDCl}_3$ )  $\delta$  159.1, 131.1, 129.4, 113.7, 87.1, 86.6, 74.2, 69.6, 69.4, 55.3, 34.9, 33.3, 33.1, 29.1, 26.0, 18.4, 18.3, 16.5, 15.9, -5.1.

**(4*S*,5*S*,*E*)-Ethyl 5,7-bis(*tert*-butyldimethylsilyloxy)-4-methylhept-2-enoate (53).**

A cooled (0 °C) stirred suspension of NaH (0.18 g, 7.07 mmol, 95 % dispersion in mineral oil) in THF (63 mL) was treated dropwise with a solution of triethyl phosphonoacetate (1.12 mL, 7.19 mmol) over 10 min period. The mixture was brought to room temperature with a water bath (30 min) and then cooled back to  $-78$  °C and the aldehyde from **52**<sup>i</sup> (2.05 g, 5.66 mmol) in THF (5 mL) was added. The resulting mixture was stirred for 1 h at 0 °C then pH 7 phosphate buffer solution (10 mL) and diethyl ether (50 mL) were added. The mixture was allowed to warm to room temperature and the phases were separated. The organic phase was washed with sat'd  $\text{NH}_4\text{Cl}$  solution (30 mL) and brine (30 mL), dried with  $\text{MgSO}_4$ , filtered and concentrated to give crude product. Purification by flash chromatography (EtOAc/hexane 1:9) afforded pure ester **53** (1.68 g, 69 % for 2 steps) as a colorless oil: IR ( $\text{CHCl}_3$ ) 2928, 2855, 1720, 1652, 1472, 1388, 1366, 1258, 1180, 1038, 832, 774  $\text{cm}^{-1}$ ;  $^1\text{H}$  NMR (300 MHz,  $\text{CDCl}_3$ )  $\delta$  7.05 (dd,  $J = 15.8, 7.0$  Hz, 1H), 5.79 (d,  $J = 15.9$  Hz, 1H), 4.18 (q,  $J = 7.1$  Hz, 2H), 3.82 (m, 1H), 3.64 (m, 2H), 2.48 (m, 1H), 1.72-1.49 (m, 2H), 1.28 (t,  $J = 7.1$  Hz, 3H), 1.01 (d,  $J = 6.8$  Hz, 3H), 0.89 (s, 9H), 0.88 (s, 9H), 0.05-0.03 (m, 12H);  $^{13}\text{C}$  NMR (75 MHz,  $\text{CDCl}_3$ )  $\delta$  166.5, 151.6, 120.9, 72.1, 59.95, 59.52, 41.8, 36.8, 25.8, 18.1, 18.0, 14.2, 13.8, -4.56, -4.61, -5.4; LRMS (EI) 415 ( $\text{M}-\text{CH}_3$ )<sup>+</sup> 373, 303, 189, 147; HRMS (EI) calcd for  $\text{C}_{21}\text{H}_{43}\text{O}_4\text{Si}_2$  415.2700 ( $\text{M}-\text{CH}_3$ )<sup>+</sup> found 415.2700;  $[\alpha]_{\text{D}}^{20}$   $-31.6$  ( $c$  1.36,  $\text{CHCl}_3$ ).

**(4*S*,5*S*,*E*)-5,7-bis(*tert*-Butyldimethylsilyloxy)-4-methylhept-2-en-1-ol (54).**

DIBALH (8.8 mL, 8.8 mmol, 1.0 M solution in hexane) was added to the above ester **53** (1.52 g, 3.53  $\mu\text{mol}$ ) in  $\text{CH}_2\text{Cl}_2$  (35 mL) at  $-78$  °C dropwise and stirred for 1 h. The reaction mixture was quenched by EtOAc (5 mL) and sat'd sodium potassium tartrate solution (20 mL) followed by vigorous stirring for 4 h. The aqueous phase was extracted with  $\text{CH}_2\text{Cl}_2$  (3 x 10 mL) and the combined organic layers were washed with brine (10 mL). After drying over  $\text{MgSO}_4$  and evaporation under vacuum, flash column chromatography (hexane/EtOAc 4:1) provided 1.33 g of alcohol (97 %) as a colorless oil: IR ( $\text{CHCl}_3$ ) 3344, 2853, 1471, 1387, 1255, 1096, 974, 834, 773  $\text{cm}^{-1}$ ;  $^1\text{H}$  NMR (300 MHz,  $\text{CDCl}_3$ )  $\delta$  5.69 (dd,  $J = 15.5, 6.6$  Hz, 1H), 5.57 (dt,  $J = 15.6, 5.6$



Hz, 1H), 4.04 (m, 2H), 3.70-3.54 (m, 3H), 2.29 (m, 1H), 1.96 (br, 1H), 1.62-1.45 (m, 2H), 0.92 (d,  $J = 7.0$  Hz, 3H), 0.85 (s, 18H), 0.00 (m, 12H);  $^{13}\text{C}$  NMR (75 MHz,  $\text{CDCl}_3$ )  $\delta$  135.1, 128.8, 72.8, 63.8, 59.8, 41.6, 36.4, 25.9, 18.2, 18.1, 15.1, -4.4, -4.6, -5.4; LRMS (EI) 331 ( $\text{M}^{-1}\text{Bu}$ )<sup>+</sup> 303, 171, 147; HRMS (EI) calcd for  $\text{C}_{16}\text{H}_{35}\text{O}_3\text{Si}_2$  331.2125 ( $\text{M}^{-1}\text{Bu}$ )<sup>+</sup> found 331.2135;  $[\alpha]_{\text{D}}^{20} -32.4$  ( $c$  0.90,  $\text{CHCl}_3$ ).

**((4*S*,5*S*,*E*)-5,7-bis(*tert*-Butyldimethylsilyloxy)-4-methylhept-2-enyloxy)triphenylmethane (55).**

Trityl chloride (2.0 g) and DMAP (0.88 g) were added to a solution of alcohol **54** (1.33 g) in pyridine (34 mL). The mixture was then refluxed for 18 h, cooled to ambient temperature and added to a solution of sat'd  $\text{CuSO}_4$  (200 mL). The mixture was extracted with  $\text{Et}_2\text{O}$  (2 x 20 mL), washed sat'd  $\text{CuSO}_4$  (2 x 20 mL). The organic layer was separated, dried ( $\text{MgSO}_4$ ), filtered, and concentrated *in vacuo*. Flash column chromatography ( $\text{EtOAc}$ /hexane 1:19) provided product (2.16 g, 94 %) as a pale yellow oil: IR ( $\text{CHCl}_3$ ) 2955, 2928, 2856, 1490, 1471, 1448, 1255, 1093, 835, 774, 705  $\text{cm}^{-1}$ ;  $^1\text{H}$  NMR (300 MHz,  $\text{CDCl}_3$ )  $\delta$  7.55-7.53 (m, 6H), 7.38-7.27 (m, 9H), 5.91 (dd,  $J = 15.7, 6.7$  Hz, 1H), 5.64 (dt,  $J = 15.5, 5.4$  Hz, 1H), 3.84-3.70 (m, 3H), 3.65 (d,  $J = 5.2$  Hz, 2H), 2.43 (m, 1H), 1.78-1.54 (m, 2H), 1.05 (d,  $J = 6.9$  Hz, 3H), 0.98 (s, 9H), 0.97 (s, 9H), 0.14 (s, 6H), 0.12 (s, 6H);  $^{13}\text{C}$  NMR (75 MHz,  $\text{CDCl}_3$ )  $\delta$  144.4, 134.4, 128.7, 127.7, 126.8, 126.4, 86.7, 72.9, 65.1, 60.0, 41.8, 36.5, 26.0, 18.3, 18.1, 15.0, -4.3, -4.5, -5.2; LRMS (EI) 573 ( $\text{M}^{-1}\text{Bu}$ )<sup>+</sup> 367, 303, 243; HRMS (EI) calcd for  $\text{C}_{35}\text{H}_{49}\text{O}_3\text{Si}_2$  573.3220 ( $\text{M}^{-1}\text{Bu}$ )<sup>+</sup> found 573.3218;  $[\alpha]_{\text{D}}^{20} -18.0$  ( $c$  1.2,  $\text{CHCl}_3$ ).

**(3*S*,4*S*,*E*)-3-(*tert*-Butyldimethylsilyloxy)-4-methyl-7-(trityloxy)hept-5-en-1-ol (56).**

A solution of TBS ether **55** (1.68 g, 2.67 mmol) in THF (10 mL) was treated slowly with HF-pyridine in pyridine (40 mL, prepared by slow addition of 12 mL pyridine to 3 mL HF-pyridine complex followed by dilution with 25 mL THF). The mixture was stirred overnight at room temperature and quenched with sat'd  $\text{NaHCO}_3$  (100 mL). The aqueous layer was separated and extracted with  $\text{Et}_2\text{O}$  (3 x 50 mL). The combined organic layers were washed with sat'd  $\text{CuSO}_4$  (3 x 50 mL), dried over  $\text{MgSO}_4$ , and concentrated. Flash column chromatography ( $\text{EtOAc}$ /hexane 3:17) afforded 1.13 g (82 %) of the alcohol as a colorless oil: IR ( $\text{CHCl}_3$ ) 3390, 2955, 2928, 2855, 1448, 1380, 1255, 1060, 836, 774  $\text{cm}^{-1}$ ;  $^1\text{H}$  NMR (300 MHz,  $\text{CDCl}_3$ )  $\delta$  7.75-7.72 (m, 6H), 7.55-7.42 (m, 9H), 6.09 (dd,  $J = 15.6, 6.4$  Hz, 1H), 5.86 (dt,  $J = 15.6, 5.2$  Hz, 1H), 4.07-3.94 (m, 3H), 3.86 (d,  $J = 5.0$  Hz, 2H), 2.70 (m, 2H), 1.93 (m, 1H), 1.54 (br, 1H), 1.27 (d,  $J = 6.7$  Hz, 3H), 1.20 (s, 9H), 0.38 (s, 3H), 0.37 (s, 3H);  $^{13}\text{C}$  NMR (75 MHz,  $\text{CDCl}_3$ )  $\delta$  144.2, 133.6, 128.5, 127.6, 126.84, 126.76, 86.7, 74.5, 64.9, 59.9, 41.6, 35.1, 25.8, 17.9, 15.6, -4.4, -4.6; LRMS (API-ESI) 539.2 [ $\text{M}+\text{Na}$ ]<sup>+</sup>; HRMS (ESI) calcd for  $\text{C}_{33}\text{H}_{44}\text{O}_3\text{Si}_1\text{Na}$  539.2957 [ $\text{M}+\text{Na}$ ]<sup>+</sup> found 539.2006;  $[\alpha]_{\text{D}}^{20} -31.8$  ( $c$  3.1,  $\text{CHCl}_3$ ).

**(3*S*,4*S*,*E*)-3-(*tert*-Butyldimethylsilyloxy)-*N*-methoxy-*N*,4-dimethyl-7-(trityloxy)hept-5-enamide (39).**

The alcohol **56** (0.34 g, 0.66 mmol) in  $\text{CH}_2\text{Cl}_2$  (10 mL) was treated with Dess-Martin periodinane (0.41 g, 0.99 mmol). After 1 h, the mixture was quenched with saturated  $\text{NaHCO}_3$  (10 mL). The aqueous layer was extracted with ethyl ether (10 mL x 2) and the combined extracts were dried over anhydrous  $\text{MgSO}_4$ . Filtration and concentration followed by short flash column chromatography (hexane/ $\text{EtOAc}$  4:1) to remove the Dess-Martin residue provided the aldehyde as a colorless oil, which was used for the next reaction without further purification. A solution of the above aldehyde in THF (10 mL) and  $\text{H}_2\text{O}$  (5 mL) was treated with a 2 M solution of 2-methyl-2-butene (1.9 mL, 0.95 mmol) in THF,  $\text{NaH}_2\text{PO}_4 \cdot \text{H}_2\text{O}$  (0.27 g, 1.96 mmol) and  $\text{NaClO}_2$  (0.22 g, 1.96 mmol). The reaction mixture was stirred for 2 h, diluted with 1N HCl (20

mL) and extracted with CH<sub>2</sub>Cl<sub>2</sub> (2 x 40 mL). The combined organic layers were dried over MgSO<sub>4</sub>, concentrated *in vacuo* and the crude **57** was used for the next reaction without further purification. To a solution of acid in CH<sub>2</sub>Cl<sub>2</sub>, *N,O*-dimethylhydroxylamine hydrochloride (0.064 g, 0.65 mmol), Et<sub>3</sub>N (0.09 mL, 0.65 mmol), DMAP (8 mg, 0.065 mmol) were successively added. The reaction mixture was cooled to 0 °C, DCC (0.14 g, 0.65 mmol) was added. The mixture was stirred at ambient temperature for 15 h and filtered. The filtrate was washed with 0.5 N HCl, saturated aqueous NaHCO<sub>3</sub>, and brine, dried over anhydrous MgSO<sub>4</sub> and concentrated. Purification by column chromatography over silica gel (hexane/EtOAc 4:1) gave the Weinreb amide **39** (0.37 g, 81 % for 3 steps) as a colorless oil: IR (CHCl<sub>3</sub>) 2956, 2929, 2855, 1661, 1448, 1385, 1251, 1089, 1054, 1003, 836, 775, 706 cm<sup>-1</sup>; <sup>1</sup>H NMR (300 MHz, CDCl<sub>3</sub>) δ 7.64-7.61 m, 6H), 7.45-7.33 (m, 9H), 6.09 (dd, *J* = 15.7, 6.6 Hz, 1H), 5.75 (dt, *J* = 15.7, 5.2 Hz, 1H), 4.42 (m, 1H), 3.76 (s, 3H), 3.70 (m, 2H), 3.29 (s, 3H), 2.88 (m, 1H), 2.55 (m, 2H), 1.18 (d, *J* = 6.8 Hz, 3H), 1.06 (s, 9H), 0.27 (s, 3H), 0.20 (s, 3H); <sup>13</sup>C NMR (75 MHz, CDCl<sub>3</sub>) δ 172.5, 144.2, 133.5, 128.5, 127.6, 126.8, 86.5, 72.8, 64.6, 61.1, 42.2, 36.0, 31.9, 25.8, 18.0, 14.8, -4.7, -4.8; LRMS (EI) 573 (M<sup>+</sup>), 558, 516, 246, 165; HRMS (EI) calcd for C<sub>35</sub>H<sub>47</sub>O<sub>4</sub>NSi 573.3290 (M<sup>+</sup>), found 573.3290; [α]<sub>D</sub><sup>20</sup> -40.1 (*c* 1.2, CHCl<sub>3</sub>).

**(4*S*,5*S*,10*S*,11*R*,12*R*,14*R*,*E*)-11-(4-Methoxybenzyloxy)-5,15-bis(*tert*-butyldimethylsilyloxy)-4,10,12,14-tetramethyl-1-(trityloxy)pentadec-2-en-8-yn-7-one (58).**

Alkyne **38** (7.75 g, 18.5 mmol) was taken up in THF (185 mL) and cooled to -78 °C. *n*-BuLi (11.6 mL, 1.6 M solution in hexane) was added slowly. After 5 min, the mixture was warmed to 0 °C and stirred for 30 min. The mixture was then cooled to -78 °C and amide **39** (5.31 g, 9.26 mmol) in THF (15 mL) was added slowly. After 5 min the solution was warmed to 0 °C and stirred for 1 h. The reaction was quenched with aq NH<sub>4</sub>Cl and the mixture was partitioned in a separatory funnel. The aqueous phase was extracted with ether (50 mL x 3) and combined organic extracts were washed with brine and dried over MgSO<sub>4</sub>. Filtration and concentration under reduced pressure, followed by flash chromatography on silica gel (hexane/EtOAc 19:1) afforded ynone **58** (8.45 g, 98 %) as a pale yellow oil: IR (CHCl<sub>3</sub>) 2955, 2929, 2856, 2208, 1674, 1514, 1470, 1249, 1092, 836, 775, 706 cm<sup>-1</sup>; <sup>1</sup>H NMR (300 MHz, CDCl<sub>3</sub>) δ 7.50-7.47 m, 6H), 7.35-7.22 (m, 11H), 6.88-6.84 (m, 2H), 5.81 (dd, *J* = 15.6, 6.7 Hz, 1H), 5.58 (dt, *J* = 15.6, 5.2 Hz, 1H), 4.64 (d, *J* = 10.8 Hz, 1H), 4.54 (d, *J* = 10.8 Hz, 1H), 4.27 (m, 1H), 3.80 (s, 3H), 3.59 (d, *J* = 5.2 Hz, 2H), 3.44-3.34 (m, 2H), 3.18 (t, *J* = 5.4 Hz, 1H), 2.94 (m, 1H), 2.62 (m, 1H), 2.38 (m, 1H), 1.89 (m, 1H), 1.68 (m, 1H), 1.26 (d, *J* = 7.0 Hz, 3H), 1.24 (m, 1H), 0.99 (d, *J* = 6.9 Hz, 3H), 0.97 (d, *J* = 6.9 Hz, 3H), 0.92 (s, 9H), 0.91 (m, 1H), 0.89 (s, 9H), 0.84 (d, *J* = 6.7 Hz, 3H), 0.09-0.05 (m, 12H); <sup>13</sup>C NMR (75 MHz, CDCl<sub>3</sub>) δ 186.4, 159.1, 144.3, 133.5, 130.7, 129.2, 128.7, 127.7, 127.3, 126.9, 113.7, 96.8, 86.8, 86.2, 82.6, 74.0, 72.3, 69.2, 64.9, 55.2, 50.5, 42.3, 34.9, 33.2, 33.0, 29.5, 26.0, 25.9, 18.3, 18.1, 17.2, 16.3, 15.9, 14.8, -4.50, -4.55, -5.3; LRMS (ESI) 953.6 [M+Na]<sup>+</sup>; HRMS (ESI) calcd for C<sub>58</sub>H<sub>82</sub>O<sub>6</sub>Si<sub>2</sub>Na 953.5548 [M+Na]<sup>+</sup>, found 953.5552; [α]<sub>D</sub><sup>20</sup> -9.5 (*c* 2.8, CHCl<sub>3</sub>).

**(4*S*,5*S*,7*S*,10*S*,11*R*,12*R*,14*R*,*E*)-11-(4-Methoxybenzyloxy)-5,15-bis(*tert*-butyldimethylsilyloxy)-4,10,12,14-tetramethyl-1-(trityloxy)pentadec-2-en-8-yn-7-ol (59).**

Ynone **58** (7.06 g, 7.59 mmol) was taken up in *i*-PrOH (100 mL). Noyori catalyst (1.02 g, 1.52 mmol, 20 mol%) was added in one portion and the solution was stirred for 12 h. The solvent was removed under vacuum, and the crude residue was purified by flash chromatography on silica gel (hexane/EtOAc 9:1), affording propargylic alcohol **59** (6.16 g, 87 %) as a pale yellow oil: IR (CHCl<sub>3</sub>) 3434, 2955, 2928, 2855, 1613, 1513, 1462, 1250, 1091, 836, 775 cm<sup>-1</sup>; <sup>1</sup>H NMR (300 MHz, CDCl<sub>3</sub>) δ 7.59-7.57 (m, 6H), 7.42-7.30 (m, 11H), 6.96-6.93 (m, 2H), 5.96 (dd, *J* = 15.7, 6.4 Hz, 1H), 5.68 (dt, *J* = 15.2, 5.3 Hz, 1H), 4.79 (d, *J* = 10.8 Hz, 1H), 4.67 (m, 1H), 4.63 (d, *J* =

10.9 Hz, 1H), 4.07 (m, 1H), 3.86 (s, 3H), 3.69 (d,  $J = 4.7$  Hz, 2H), 3.49 (m, 2H), 3.22 (t,  $J = 5.5$  Hz, 1H), 2.91 (m, 1H), 2.67 (d,  $J = 5.3$  Hz, 1H), 2.56 (m, 1H), 1.98 (m, 1H), 1.86 (m, 2H), 1.77 (m, 1H), 1.36 (m, 1H), 1.31 (d,  $J = 7.0$  Hz, 3H), 1.09 (d,  $J = 7.1$  Hz, 3H), 1.06 (d,  $J = 7.1$  Hz, 3H), 1.03 (s, 9H), 1.02 (s, 9H), 0.94 (d,  $J = 6.6$  Hz, 3H), 0.24 (s, 3H), 0.22 (s, 3H), 0.15 (s, 6H);  $^{13}\text{C}$  NMR (75 MHz,  $\text{CDCl}_3$ )  $\delta$  158.9, 144.3, 133.2, 131.0, 129.1, 128.6, 127.7, 127.0, 126.8, 113.5, 87.5, 86.79, 86.74, 82.6, 74.0, 73.3, 69.3, 65.0, 59.6, 55.1, 41.4, 40.2, 34.5, 33.1, 32.7, 29.1, 25.9, 18.3, 18.0, 17.9, 16.6, 15.8, 15.3, -4.3, -4.5, -5.4; LRMS (ESI) 955.6  $[\text{M}+\text{Na}]^+$ ; HRMS (ESI) calcd for  $\text{C}_{58}\text{H}_{84}\text{O}_6\text{Si}_2\text{Na}$  955.5704  $[\text{M}+\text{Na}]^+$ , found 955.5734;  $[\alpha]_{\text{D}}^{20} -8.5$  ( $c$  1.5,  $\text{CHCl}_3$ ).

**(2*E*,4*S*,5*S*,7*S*,8*Z*,10*S*,11*R*,12*R*,14*R*)-11-(4-Methoxybenzyloxy)-5-(*tert*-butyldimethylsilyloxy)-15-(*tert*-butyldimethylsilyloxy)-4,10,12,14-tetramethyl-1-(trityloxy)pentadeca-2,8-dien-7-ol (60).**

A catalytic amount of Lindlar catalyst (ca. 200 mg) was added to a solution of alcohol **59** (3.11 g, 3.33 mmol) in toluene (100 mL). The flask was fitted with a  $\text{H}_2$  balloon, and stirred under an atmosphere of  $\text{H}_2$  until starting material was consumed (usually 1 h), as indicated by TLC analysis. The mixture was filtered through a pad of celite and concentrated under reduced pressure to afford the olefin **60** as a colorless oil (2.81 g, 90 %): IR ( $\text{CHCl}_3$ ) 3434, 2956, 2928, 2856, 1613, 1514, 1471, 1249, 1062, 836, 774  $\text{cm}^{-1}$ ;  $^1\text{H}$  NMR (300 MHz,  $\text{CDCl}_3$ )  $\delta$  7.58-7.55 (m, 6H), 7.4-7.29 (m, 1H), 6.93 (m, 2H), 5.90 (dd,  $J = 15.6, 6.6$  Hz, 1H), 5.68 (dt,  $J = 15.7, 5.4$  Hz, 1H), 5.60 (dd,  $J = 11.1, 8.9$  Hz, 1H), 5.51 (dd,  $J = 11.2, 7.3$  Hz, 1H), 4.66 (m, 1H), 4.58 (d,  $J = 10.9$  Hz, 1H), 4.55 (d,  $J = 10.9$  Hz, 1H), 3.95 (m, 1H), 3.86 (s, 3H), 3.66 (dd,  $J = 4.9$  Hz, 1H), 3.52-3.38 (m, 2H), 3.01 (m, 2H), 2.89 (br, 1H), 2.55 (m, 1H), 1.79 (m, 1H), 1.70 (m, 1H), 1.62 (m, 2H), 1.33-1.29 (m, 2H), 1.12 (d,  $J = 5.8$  Hz, 3H), 1.10 (d,  $J = 6.7$  Hz, 3H), 1.02 (s, 9H), 1.01 (s, 9H), 0.89 (d,  $J = 6.1$  Hz, 3H), 0.87 (d,  $J = 6.3$  Hz, 3H), 0.19 (s, 6H), 0.14 (s, 6H);  $^{13}\text{C}$  NMR (75 MHz,  $\text{CDCl}_3$ )  $\delta$  158.9, 144.3, 134.1, 133.5, 132.6, 131.0, 129.0, 128.6, 127.7, 126.8, 126.7, 113.5, 88.4, 86.7, 74.9, 73.5, 69.4, 65.2, 65.1, 55.1, 41.8, 40.2, 35.0, 34.6, 33.1, 25.9, 19.1, 18.3, 18.0, 16.6, 15.8, 15.6, -4.4, -4.5, -5.3; LRMS (ESI) 957.6  $[\text{M}+\text{Na}]^+$ ; HRMS (ESI) calcd for  $\text{C}_{58}\text{H}_{86}\text{O}_6\text{Si}_2\text{Na}$  957.5861  $[\text{M}+\text{Na}]^+$ , found 957.5900;  $[\alpha]_{\text{D}}^{20} +2.0$  ( $c$  1.2,  $\text{CHCl}_3$ ).

**[(2*E*,4*S*,5*S*,7*S*,8*Z*,10*S*,11*R*,12*R*,14*R*)-11-(4-Methoxybenzyloxy)-5,7,15-*tris*(*tert*-butyldimethylsilyloxy)-4,10,12,14-tetramethylpentadeca-2,8-dienyloxy]triphenylmethane (61).**

TBSOTf (1.05 mL, 4.57 mmol) was added to a stirred solution of the alcohol **60** (3.89 g, 4.16 mmol) and 2,6-lutidine (0.58 mL, 5.01 mmol) in  $\text{CH}_2\text{Cl}_2$  (14 mL) at 0 °C. After stirring for 1 h at 0 °C, the reaction mixture was quenched by the addition of water (25 mL), and extracted by  $\text{CH}_2\text{Cl}_2$  and dried over  $\text{MgSO}_4$ , followed by the evaporation of the solvent under reduced pressure. The residue was purified by short column chromatography (hexane/EtOAc 9:1) to obtain the product **61** (4.36 g, quantitative) as a colorless oil: IR ( $\text{CHCl}_3$ ) 2956, 2928, 2856, 1613, 1514, 1471, 1462, 1250, 1088, 836, 773, 705  $\text{cm}^{-1}$ ;  $^1\text{H}$  NMR (300 MHz,  $\text{CDCl}_3$ )  $\delta$  7.61-7.58 (m, 6H), 7.43-7.31 (m, 11H), 6.97-6.94 (m, 2H), 5.95 (dd,  $J = 15.7, 6.0$  Hz, 1H), 5.67 (dt,  $J = 15.7, 5.6$  Hz, 1H), 5.62-5.46 (m, 2H), 4.71 (m, 1H), 4.62 (m, 2H), 4.05 (m, 1H), 3.87 (s, 3H), 3.69 (d,  $J = 5.3$  Hz, 2H), 3.53-3.40 (m, 2H), 3.08 (m, 1H), 2.91 (m, 1H), 2.51 (m, 1H), 1.76 (m, 1H), 1.66 (m, 2H), 1.50-1.40 (m, 2H), 1.32 (m, 1H), 1.22 (d,  $J = 6.8$  Hz, 6H), 1.09 (d,  $J = 6.9$  Hz, 3H), 1.06-0.96 (m, 27H), 0.91 (d,  $J = 6.6$  Hz, 3H), 0.83 (d,  $J = 6.5$  Hz, 3H), 0.25-0.17 (m, 18H);  $^{13}\text{C}$  NMR (75 MHz,  $\text{CDCl}_3$ )  $\delta$  158.9, 144.4, 134.3, 133.7, 131.4, 129.4, 129.0, 128.6, 127.7, 126.8, 126.4, 113.5, 88.8, 86.7, 74.8, 72.8, 69.5, 66.3, 65.1, 55.1, 43.0, 42.3, 35.4, 35.1, 33.4, 33.1, 26.1, 26.0, 18.8, 18.3, 18.1, 16.7, 15.7, 14.6, -2.8, -3.9, -4.1, -4.2, -5.3; LRMS (ESI)

1071.9 [M+Na]<sup>+</sup>; HRMS (ESI) calcd for C<sub>64</sub>H<sub>100</sub>O<sub>6</sub>Si<sub>3</sub>Na 1071.6725 [M+Na]<sup>+</sup>, found 1071.6779; [α]<sub>D</sub><sup>20</sup> -9.5 (*c* 3.0, CHCl<sub>3</sub>).

**(2R,4R,5R,6S,7Z,9S,11S,12S,13E)-1,9,11-tris(*tert*-Butyldimethylsilyloxy)-2,4,6,12-tetramethyl-15-(trityloxy)pentadeca-7,13-dien-5-ol (62).**

The above PMB alcohol **61** (2.90 g, 2.77 mmol) was added to CH<sub>2</sub>Cl<sub>2</sub> (25 mL) and H<sub>2</sub>O (1 mL), and DDQ (0.94 g, 4.15 mmol) was added. After 1 h of stirring, the reaction mixture was quenched by adding sat'd NaHCO<sub>3</sub> (200 mL). The organic phase was washed by sat'd NaHCO<sub>3</sub> solution (3 x 100 mL) and brine, dried over MgSO<sub>4</sub> and concentrated. Purification by flash column chromatography (EtOAc/hexane 1:19) furnished **62** (2.16 g, 84 %) as a colorless oil: IR (CHCl<sub>3</sub>) 3477, 2956, 2928, 2856, 1471, 1386, 1254, 1088, 836, 774 cm<sup>-1</sup>; <sup>1</sup>H NMR (300 MHz, CDCl<sub>3</sub>) δ 7.55-7.52 (m, 6H), 7.38-7.25 (m, 9H), 5.92 (dd, *J* = 15.7, 6.0 Hz, 1H), 5.62 (dt, *J* = 15.7, 5.5 Hz, 1H), 5.52 (dd, *J* = 11.1, 9.3 Hz, 1H), 5.35 (t, *J* = 10.5 Hz, 1H), 4.63 (m, 1H), 3.97 (m, 1H), 3.63 (d, *J* = 5.4 Hz, 2H), 3.51-3.36 (m, 2H), 3.18 (m, 1H), 2.68 (m, 1H), 2.47 (m, 1H), 1.71-1.59 (m, 3H), 1.42-1.27 (m, 2H), 1.17 (m, 1H), 1.08 (d, *J* = 6.7 Hz, 3H), 1.04 (d, *J* = 6.9 Hz, 3H), 0.99 (s, 9H), 0.97 (s, 9H), 0.96 (s, 9H), 0.91 (d, *J* = 6.8 Hz, 3H), 0.84 (d, *J* = 6.6 Hz, 3H), 0.18 (s, 3H), 0.16 (s, 3H), 0.15 (s, 3H), 0.13 (s, 3H), 0.12 (s, 6H); <sup>13</sup>C NMR (75 MHz, CDCl<sub>3</sub>) δ 144.4, 135.2, 134.1, 131.1, 128.7, 127.7, 126.8, 126.4, 86.7, 79.8, 72.8, 69.6, 66.2, 65.2, 43.0, 42.1, 35.5, 33.7, 32.8, 32.5, 26.1, 26.0, 25.9, 18.4, 18.1, 17.6, 16.8, 16.3, 14.7, -2.9, -4.0, -4.15, -4.22, -5.3; LRMS (ESI) 951.7 [M+Na]<sup>+</sup>; HRMS (ESI) calcd for C<sub>56</sub>H<sub>92</sub>O<sub>5</sub>Si<sub>3</sub>Na 951.6150 [M+Na]<sup>+</sup>, found 951.6165; [α]<sub>D</sub><sup>20</sup> 30.0 (*c* 3.6, CHCl<sub>3</sub>).

**[(2E,4S,5S,7S,8Z,10S,11R,12R,14R)-5,7,11,15-tetrakis(*tert*-Butyldimethylsilyloxy)-4,10,12,14-tetramethylpentadeca-2,8-dienyloxy]triphenylmethane (63).**

The procedure for **61** was used with above **62** (3.34 g, 3.60 μmol), TBSOTf (1.82 mL, 7.9 mmol) to yield 3.53 g (94 %) of the product by flash column chromatography (EtOAc/hexane 1:19) as a colorless oil: IR (CHCl<sub>3</sub>) 2956, 2928, 2856, 1471, 1462, 1361, 1254, 1088, 836, 773, 705 cm<sup>-1</sup>; <sup>1</sup>H NMR (300 MHz, CDCl<sub>3</sub>) δ 7.50-7.48 (m, 6H), 7.34-7.22 (m, 9H), 5.82 (dd, *J* = 15.7, 6.0 Hz, 1H), 5.57 (dt, *J* = 15.8, 5.9 Hz, 1H), 5.48 (dd, *J* = 11.0, 9.9 Hz, 1H), 5.32 (dd, *J* = 11.0, 8.7 Hz, 1H), 4.56 (m, 1H), 3.93 (m, 1H), 3.59 (d, *J* = 5.5 Hz, 2H), 3.39 (dd, *J* = 9.6, 5.8 Hz, 1H), 3.31-3.27 (m, 2H), 2.62 (m, 1H), 2.40 (m, 1H), 1.58-1.50 (m, 3H), 1.35 (m, 1H), 1.20-1.09 (m, 2H), 1.02 (d, *J* = 7.1 Hz, 3H), 1.00 (d, *J* = 7.0 Hz, 3H), 0.94 (s, 9H), 0.92 (s, 9H), 0.91 (s, 9H), 0.90 (s, 9H), 0.78 (d, *J* = 6.8 Hz, 3H), 0.74 (d, *J* = 6.6 Hz, 3H), 0.13-0.05 (m, 24H); <sup>13</sup>C NMR (75 MHz, CDCl<sub>3</sub>) δ 144.4, 134.5, 133.0, 131.8, 128.7, 127.7, 126.8, 126.4, 86.7, 81.2, 72.8, 69.3, 66.6, 65.3, 43.1, 42.3, 35.9, 35.1, 33.3, 29.7, 26.2, 26.1, 26.0, 19.6, 18.4, 18.3, 18.2, 16.3, 16.0, 14.6, -2.8, -3.5, -3.6, -4.0, -4.1, -5.3; LRMS (ESI) 1065.7 [M+Na]<sup>+</sup>; HRMS (ESI) calcd for C<sub>62</sub>H<sub>106</sub>O<sub>5</sub>Si<sub>4</sub>Na 1065.7015 [M+Na]<sup>+</sup>, found 1065.7068; [α]<sub>D</sub><sup>20</sup> -22.5 (*c* 2.0, CHCl<sub>3</sub>).

**(2R,4R,5R,6S,7Z,9S,11S,12S,13E)-5,9,11-tris(*tert*-Butyldimethylsilyloxy)-2,4,6,12-tetramethyl-15-(trityloxy)pentadeca-7,13-dien-1-ol (64).**

HF-pyridine in pyridine (40 mL, prepared by slow addition of 12 mL pyridine to 3 mL HF-pyridine complex followed by dilution with 25 mL THF) was slowly added to a solution of TBS ether **63** (3.54 g, 4.10 mmol) in THF (5 mL) at 0 °C. The mixture was stirred for 2 days at 0 °C and quenched with sat'd NaHCO<sub>3</sub> (100 mL). The aqueous layer was separated and extracted with Et<sub>2</sub>O (3 x 50 mL). The combined organic layers were washed with sat'd CuSO<sub>4</sub> (3 x 50 mL), dried over MgSO<sub>4</sub>, and concentrated. Flash column chromatography (EtOAc/hexane 3:17) afforded 2.08 g (66 %) of the alcohol as a colorless oil: IR (CHCl<sub>3</sub>) 3400, 2956, 2928, 2856, 1471, 1448, 1254, 1075, 836, 773 cm<sup>-1</sup>; <sup>1</sup>H NMR (300 MHz, CDCl<sub>3</sub>) δ 7.52-7.48 (m, 6H), 7.36-7.24 (m, 9H), 5.87 (dd, *J* = 15.7, 5.9 Hz, 1H), 5.59 (dt, *J* = 15.7, 5.7 Hz, 1H), 5.55 (dd, *J* = 10.6,

10.4 Hz, 1H), 5.33 (dd,  $J = 11.0, 8.7$  Hz, 1H), 4.58 (m, 1H), 3.94 (m, 1H), 3.60 (d,  $J = 5.5$  Hz, 2H), 3.38-3.32 (m, 2H), 3.25 (m, 1H), 2.62 (m, 1H), 2.45 (m, 1H), 1.59 (m, 1H), 1.55 (m, 1H), 1.47 (m, 1H), 1.35 (m, 1H), 1.09 (m, 1H), 1.04 (d,  $J = 7.6$  Hz, 3H), 1.01 (d,  $J = 7.2$  Hz, 3H), 0.96 (s, 9H), 0.94 (s, 9H), 0.93 (s, 9H), 0.79 (d,  $J = 6.8$  Hz, 3H), 0.75 (d,  $J = 6.6$  Hz, 3H), 0.15 (s, 9H), 0.14 (s, 3H), 0.10 (s, 3H), 0.09 (s, 3H), 0.08 (s, 3H), 0.07 (s, 3H);  $^{13}\text{C}$  NMR (75 MHz,  $\text{CDCl}_3$ )  $\delta$  144.4, 134.0, 132.7, 131.3, 128.7, 127.7, 126.8, 126.5, 86.8, 81.0, 73.0, 69.2, 66.5, 65.3, 42.6, 42.2, 36.2, 35.5, 34.6, 33.3, 26.2, 26.1, 25.9, 20.0, 18.4, 18.2, 18.1, 15.7, 15.6, 14.9, -2.8, -3.7, -3.8, -4.0, -4.1, -4.2; LRMS (ESI) 951.6  $[\text{M}+\text{Na}]^+$ ; HRMS (ESI) calcd for  $\text{C}_{56}\text{H}_{92}\text{O}_5\text{Si}_3\text{Na}$  951.6150  $[\text{M}+\text{Na}]^+$ , found 951.6158;  $[\alpha]_D^{20} -33.5$  ( $c$  2.0,  $\text{CHCl}_3$ ).

**(2R,4E,6R,8R,9R,10S,11Z,13S,15S,16S,17E)-9,13,15-tris(*tert*-Butyldimethylsilyloxy)-2-[(4S,5S)-2-(4-methoxyphenyl)-5-methyl-1,3-dioxan-4-yl]-6,8,10,16-tetramethyl-19-(trityloxy)nonadeca-4,11,17-trien-3-one (65).**

The alcohol **64** (2.04 g, 2.20 mmol) in  $\text{CH}_2\text{Cl}_2$  (30 mL) was treated with Dess-Martin periodinane (1.40 g, 3.30 mmol). After 1 h, the mixture was quenched with saturated  $\text{NaHCO}_3$  (30 mL) and  $\text{Na}_2\text{S}_2\text{O}_3$  (30 mL). The aqueous layer was extracted with ethyl ether (30 mL x 2) and the combined extracts were dried over anhydrous  $\text{MgSO}_4$ . Filtration and concentration followed by short flash column chromatography filtration (hexane/EtOAc 4:1) to remove the residue from the Dess-Martin reagent provided crude aldehyde as a colorless oil, which was used for the next reaction without further purification. A mixture of ketophosphonate **7** (0.85 g, 2.20 mmol) and  $\text{Ba}(\text{OH})_2$  (0.30 g, activated by heating to 100 °C for 1-2 h before use) in THF (40 mL) was stirred at room temperature for 30 min. A solution of the above aldehyde in wet THF (4 mL + 4 x 1 mL washings, 40:1 THF/ $\text{H}_2\text{O}$ ) was then added. After stirring for 12 h, the reaction mixture was diluted with  $\text{Et}_2\text{O}$  (30 mL) and washed with sat'd  $\text{NaHCO}_3$  (50 mL) and brine (50 mL). The organic solution was dried ( $\text{MgSO}_4$ ) and the solvent was evaporated *in vacuo*. The residue was chromatographed (hexane/EtOAc 9:1) to yield **65** (2.04 g, 78 % for 2 steps) as a colorless oil: IR ( $\text{CHCl}_3$ ) 2957, 2929, 2855, 1618, 1518, 1461, 1388, 1251, 1078, 1036, 836, 773  $\text{cm}^{-1}$ ;  $^1\text{H}$  NMR (300 MHz,  $\text{CDCl}_3$ )  $\delta$  7.49-7.46 (m, 6H), 7.39 (m, 2H), 7.33-7.21 (m, 9H), 6.89 (m, 2H), 6.79 (dd,  $J = 15.7, 7.4$  Hz, 1H), 6.20 (d,  $J = 15.6$  Hz, 1H), 5.85 (dd,  $J = 15.7, 5.9$  Hz, 1H), 5.58 (dt,  $J = 15.7, 4.6$  Hz, 1H), 5.49 (dd,  $J = 11.0, 10.4$  Hz, 1H), 5.46 (s, 1H), 5.34 (dd,  $J = 11.1, 8.6$  Hz, 1H), 4.56 (m, 1H), 4.12 (dd,  $J = 11.3, 4.6$  Hz, 1H), 3.92 (m, 2H), 3.81 (s, 3H), 3.57 (d,  $J = 5.6$  Hz, 1H), 3.54 (m, 1H), 3.29 (dd,  $J = 5.6, 2.4$  Hz, 1H), 2.93 (m, 1H), 2.61 (m, 1H), 2.43 (m, 1H), 2.18 (m, 1H), 2.01 (m, 1H), 1.59-1.46 (m, 2H), 1.43 (m, 1H), 1.35-1.29 (m, 2H), 1.25 (d,  $J = 7.0$  Hz, 3H), 1.03 (d,  $J = 7.2$  Hz, 3H), 1.00 (d,  $J = 7.0$  Hz, 3H), 0.94 (s, 9H), 0.92 (s, 9H), 0.91 (s, 9H), 0.82 (d,  $J = 7.0$  Hz, 3H), 0.79 (d,  $J = 6.7$  Hz, 3H), 0.77 (d,  $J = 6.5$  Hz, 3H), 0.13 (s, 3H), 0.12 (s, 3H), 0.09 (s, 3H), 0.08 (s, 3H), 0.05 (s, 3H), 0.02 (s, 3H);  $^{13}\text{C}$  NMR (75 MHz,  $\text{CDCl}_3$ )  $\delta$  200.7, 159.8, 153.3, 144.3, 134.0, 133.3, 131.1, 130.8, 128.6, 127.7, 127.2, 126.8, 126.5, 125.7, 113.4, 100.8, 86.7, 82.7, 80.4, 72.8, 66.5, 65.8, 65.2, 55.2, 47.0, 42.8, 42.1, 39.1, 35.6, 34.9, 34.0, 32.3, 26.1, 26.0, 25.9, 19.7, 18.39, 18.36, 18.1, 16.4, 15.2, 14.7, 12.4, 10.7, -2.8, -3.6, -3.7, -4.0, -4.1; LRMS (ESI) 1209.7  $[\text{M}+\text{Na}]^+$ ; HRMS (ESI) calcd for  $\text{C}_{72}\text{H}_{110}\text{O}_8\text{Si}_3\text{Na}$  1209.7406  $[\text{M}+\text{Na}]^+$ , found 1209.7466;  $[\alpha]_D^{20} -8.6$  ( $c$  2.5,  $\text{CHCl}_3$ ).

**(2R,6S,8R,9R,10S,11Z,13S,15S,16S,17E)-9,13,15-tris(*tert*-Butyldimethylsilyloxy)-2-[(4S,5S)-2-(4-methoxyphenyl)-5-methyl-1,3-dioxan-4-yl]-6,8,10,16-tetramethyl-19-(trityloxy)nonadeca-11,17-dien-3-one (66).**

$\text{NiCl}_2 \cdot 6\text{H}_2\text{O}$  (0.20 g, 0.84 mmol) then portionwise  $\text{NaBH}_4$  (0.17 g, 4.49 mmol) were added to a stirred solution of unsaturated ketone **65** (2.60 g, 1.72 mmol) in MeOH (60 mL), THF (20 mL) at 0 °C. After 1 h, the reaction mixture was evaporated and filtered with celite using  $\text{Et}_2\text{O}$  as an eluent (30 mL). The organic phase was concentrated and the residue was purified by flash

chromatography (EtOAc/hexane 1:9) to yield **66** (1.55 g, 76 %) as a colorless oil: IR (CHCl<sub>3</sub>) 2956, 2929, 2855, 1713, 1616, 1518, 1462, 1251, 1076, 836, 773 cm<sup>-1</sup>; <sup>1</sup>H NMR (300 MHz, CDCl<sub>3</sub>) δ 7.52-7.50 (m, 6H), 7.42-7.24 (m, 11H), 6.92-6.86 (m, 2H), 5.87 (dd, *J* = 15.7, 6.0 Hz, 2H), 5.60 (dt, *J* = 15.8, 5.9 Hz, 1H), 5.50 (m, 1H), 5.49 (s, 1H), 5.37 (dd, *J* = 10.9, 8.5 Hz, 1H), 4.59 (m, 1H), 4.17 (dd, *J* = 11.3, 4.7 Hz, 1H), 3.98 (m, 2H), 3.82 (s, 3H), 3.62-3.55 (m, 3H), 3.29 (m, 1H), 2.73 (m, 1H), 2.65 (m, 1H), 2.49 (m, 2H), 2.06 (m, 1H), 1.63-1.50 (m, 2H), 1.47-1.32 (m, 2H), 1.27 (d, *J* = 7.1 Hz, 3H), 1.26 (m, 1H), 1.06 (d, *J* = 7.3 Hz, 3H), 1.03 (d, *J* = 7.2 Hz, 3H), 0.97-0.94 (m, 27H), 0.90-0.84 (m, 2H), 0.83 (d, *J* = 6.7 Hz, 3H), 0.76 (d, *J* = 7.0 Hz, 3H), 0.69 (d, *J* = 5.7 Hz, 3H), 0.17-0.05 (m, 18H); <sup>13</sup>C NMR (75 MHz, CDCl<sub>3</sub>) δ 211.7, 159.8, 144.4, 134.3, 133.1, 131.4, 130.9, 128.6, 127.9, 127.6, 127.1, 126.8, 126.4, 113.4, 100.8, 86.7, 82.9, 81.0, 72.8, 66.5, 65.2, 55.2, 48.3, 43.0, 42.2, 39.8, 38.3, 35.2, 35.1, 31.9, 31.3, 29.7, 26.2, 26.0, 25.9, 19.6, 18.6, 18.4, 18.1, 16.3, 14.6, 12.1, 9.7, -2.9, -3.5, -3.6, -4.0, -4.1, -4.2; LRMS (ESI) 1211.8 [M+Na]<sup>+</sup>; HRMS (ESI) calcd for C<sub>72</sub>H<sub>112</sub>O<sub>8</sub>Si<sub>3</sub>Na 1211.7563 [M+Na]<sup>+</sup>, found 1211.7629; [α]<sub>D</sub><sup>20</sup> -4.3 (*c* 1.0, CHCl<sub>3</sub>).

**(2*S*,3*R*,6*S*,8*R*,9*R*,10*S*,11*Z*,13*S*,15*S*,16*S*,17*E*)-9,13,15-tris(*tert*-Butyldimethylsilyloxy)-2-[(4*S*,5*S*)-2-(4-methoxyphenyl)-5-methyl-1,3-dioxan-4-yl]-6,8,10,16-tetramethyl-19-(trityloxy)nonadeca-11,17-dien-3-ol (**67**).**

NaBH<sub>4</sub> (0.074 g, 1.96 mmol) was added to a solution of ketone **66** (1.55 g, 1.30 mmol) in MeOH (21 mL) at 0 °C. After stirring for 2 h at 0 °C, the reaction mixture was evaporated and water (30 mL) was added. The reaction mixture was extracted with ether (2 x 40 mL) and washed with brine (50 mL), dried over MgSO<sub>4</sub> and concentrated *in vacuo*. The residue was purified by flash chromatography (EtOAc/hexane 1:9) to yield 1.02 g of major product β (less polar, 62 %) and 0.60 g (more polar, 36 %) of minor product α as colorless oils: (**67β**) IR (CHCl<sub>3</sub>) 3540, 2956, 2929, 2855, 1615, 1518, 1461, 1385, 1252, 1074, 835, 773, 706 cm<sup>-1</sup>; <sup>1</sup>H NMR (300 MHz, CDCl<sub>3</sub>) δ 7.54-7.50 (m, 6H), 7.42 (m, 2H), 7.37-7.25 (m, 9H), 6.94-6.91 (m, 2H), 5.88 (dd, *J* = 15.7, 6.0 Hz, 1H), 5.61 (dt, *J* = 16.0, 5.7 Hz, 1H), 5.56 (s, 1H), 5.50 (m, 1H), 5.37 (dd, *J* = 10.8, 8.6 Hz, 1H), 4.60 (m, 1H), 4.17 (dd, *J* = 11.2, 4.6 Hz, 1H), 3.96 (m, 1H), 3.87 (m, 1H), 3.84 (s, 3H), 3.74 (m, 1H), 3.64-3.53 (m, 3H), 3.32 (m, 1H), 3.20 (br, 1H), 2.67 (m, 1H), 2.44 (m, 1H), 2.18 (m, 1H), 1.83 (m, 1H), 1.67-1.51 (m, 2H), 1.50-1.32 (m, 3H), 1.26 (m, 1H), 1.08 (d, *J* = 6.8 Hz, 3H), 1.07 (m, 2H), 1.06 (d, *J* = 7.0 Hz, 3H), 1.04 (d, *J* = 7.4 Hz, 3H), 0.98-0.85 (m, 2H), 0.82 (d, *J* = 6.7 Hz, 3H), 0.81 (d, *J* = 6.7 Hz, 3H), 0.77 (d, *J* = 6.0 Hz, 3H), 0.18-0.09 (m, 18H); <sup>13</sup>C NMR (75 MHz, CDCl<sub>3</sub>) δ 160.0, 144.5, 144.4, 134.4, 132.9, 131.6, 130.7, 128.6, 127.6, 127.2, 126.8, 126.7, 126.4, 113.6, 101.2, 89.1, 86.7, 81.1, 76.8, 73.1, 72.8, 66.5, 55.2, 43.0, 42.3, 39.9, 37.2, 35.3, 35.1, 34.7, 32.3, 30.4, 30.2, 26.2, 26.1, 25.9, 19.6, 18.8, 18.4, 18.13, 18.10, 16.3, 14.6, 11.9, 5.5, -2.8, -3.56, -3.61, -4.0, -4.1, -4.16, -4.25; LRMS (API-ES) 1213.6 [M+Na]<sup>+</sup>, 557.0, 359.2, 243.1; HRMS (ESI) calcd for C<sub>72</sub>H<sub>114</sub>O<sub>8</sub>Si<sub>3</sub>Na 1213.7719 [M+Na]<sup>+</sup>, found 1213.7717; [α]<sub>D</sub><sup>20</sup> -0.68 (*c* 7.1, CHCl<sub>3</sub>); (**67α**) IR (CHCl<sub>3</sub>) 3531, 2956, 2929, 2855, 1615, 1518, 1462, 1383, 1252, 1075, 836, 773 cm<sup>-1</sup>; <sup>1</sup>H NMR (300 MHz, CDCl<sub>3</sub>) δ 7.53-7.49 (m, 6H), 7.44-7.41 (m, 2H), 7.36-7.24 (m, 9H), 6.94-6.91 (m, 2H), 5.86 (dd, *J* = 15.7, 6.0 Hz, 1H), 5.60 (dt, *J* = 15.7, 5.7 Hz, 1H), 5.54 (s, 1H), 5.56-5.47 (m, 1H), 5.36 (dd, *J* = 11.0, 8.6 Hz, 1H), 4.60 (m, 1H), 4.17 (dd, *J* = 11.2, 4.6 Hz, 1H), 3.97-3.91 (m, 2H), 3.84 (s, 3H), 3.62 (d, *J* = 4.9 Hz, 2H), 3.61-3.53 (m, 2H), 3.32 (m, 1H), 2.67 (m, 1H), 2.44 (m, 1H), 2.16 (m, 1H), 1.82 (m, 1H), 1.72-1.50 (m, 4H), 1.42-1.33 (m, 2H), 1.32-1.22 (m, 2H), 1.14 (d, *J* = 7.1 Hz, 3H), 1.06 (d, *J* = 7.0 Hz, 3H), 1.03 (d, *J* = 7.0 Hz, 3H), 0.97-0.92 (m, 27H), 0.90-0.85 (m, 2H), 0.81 (d, *J* = 6.4 Hz, 3H), 0.79 (d, *J* = 6.6 Hz, 3H), 0.76 (d, *J* = 5.7 Hz, 3H), 0.17-0.09 (m, 18H); <sup>13</sup>C NMR (75 MHz, CDCl<sub>3</sub>) δ 160.0, 144.6, 144.4, 134.4, 133.0, 131.6, 131.1, 128.7, 127.7, 127.6, 127.3, 126.8, 126.7, 126.4, 113.6, 101.0, 86.7, 82.8, 81.2, 75.1, 73.3, 72.8, 66.6, 65.2, 55.2, 43.0, 42.3, 39.9, 37.9, 35.3, 35.1, 34.6, 33.4, 30.3, 26.3, 26.1, 26.0, 19.7, 19.0, 18.4, 18.1, 16.4, 14.6, 11.9, 11.1, -

2.8, -3.5, -4.0, -4.07, -4.13; LRMS (ESI) 1213.8 [M+Na]<sup>+</sup>; HRMS (ESI) calcd for C<sub>72</sub>H<sub>114</sub>O<sub>8</sub>Si<sub>3</sub>Na 1213.7719 [M+Na]<sup>+</sup>, found 1213.7766; [α]<sub>D</sub><sup>20</sup> -1.4 (c 4.7, CHCl<sub>3</sub>).

**(4S,5S)-4-[(2R,3R,6S,8R,9R,10S,11Z,13S,15S,16S,17E)-3,9,13,15-tetrakis(*tert*-Butyldimethylsilyloxy)-6,8,10,16-tetramethyl-19-(trityloxy)nonadeca-11,17-dien-2-yl]-2-(4-methoxyphenyl)-5-methyl-1,3-dioxane (68β).**

TBSOTf (0.30 mL, 2.57 mmol) was added to a stirred solution of alcohol **67β** (1.02 g, 0.86 mmol) and 2,6-lutidine (0.20 mL, 1.71 mmol) in CH<sub>2</sub>Cl<sub>2</sub> (17 mL) at 0 °C and the reaction mixture was stirred for 1 h at ambient temperature. The reaction mixture was quenched by the addition of water (50 mL). The reaction mixture was extracted by CH<sub>2</sub>Cl<sub>2</sub> and dried over MgSO<sub>4</sub> followed by the evaporation of the solution under reduced pressure. The residue was purified by short column chromatography (hexane/EtOAc 9:1) to yield product (0.97 g, 86 %) as a colorless oil: IR (CHCl<sub>3</sub>) 2955, 2928, 2856, 1615, 1518, 1471, 1462, 1387, 1251, 1074, 1038, 835, 773 cm<sup>-1</sup>; <sup>1</sup>H NMR (300 MHz, CDCl<sub>3</sub>) δ 7.52-7.46 (m, 6H), 7.45-7.42 (m, 2H), 7.35-7.22 (m, 9H), 6.92-6.89 (m, 2H), 5.86 (dd, *J* = 15.7, 6.0 Hz, 1H), 5.59 (dt, *J* = 15.7, 4.9 Hz, 1H), 5.48 (m, 1H), 5.47 (s, 1H), 5.36 (dd, *J* = 11.1, 8.6 Hz, 1H), 4.58 (m, 1H), 4.15 (dd, *J* = 11.2, 4.6 Hz, 1H), 3.96 (m, 1H), 3.81 (s, 3H), 3.73-3.66 (m, 2H), 3.60 (d, *J* = 5.6 Hz, 2H), 3.55 (m, 1H), 3.19 (m, 1H), 2.65 (m, 1H), 2.42 (m, 1H), 2.07 (m, 1H), 1.91 (m, 1H), 1.57 (m, 2H), 1.40-1.21 (m, 3H), 1.14 (m, 1H), 1.06 (d, *J* = 6.7 Hz, 3H), 1.04 (d, *J* = 5.9 Hz, 3H), 1.02 (d, *J* = 6.9 Hz, 3H), 0.96-0.92 (m, 36H), 0.88-0.84 (m, 3H), 0.80 (m, 1H), 0.77 (d, *J* = 6.5 Hz, 3H), 0.76 (d, *J* = 6.4 Hz, 3H), 0.71 (d, *J* = 5.1 Hz, 3H), 0.16-0.03 (m, 24H); <sup>13</sup>C NMR (75 MHz, CDCl<sub>3</sub>) δ 159.7, 144.6, 144.4, 134.4, 133.2, 131.7, 131.4, 128.7, 127.7, 127.2, 126.8, 126.4, 113.4, 100.4, 86.7, 81.8, 81.4, 75.0, 73.3, 72.8, 66.5, 65.2, 55.2, 43.1, 42.3, 39.7, 38.9, 35.3, 35.0, 34.0, 31.2, 30.7, 30.6, 26.2, 26.1, 26.00, 25.95, 19.5, 19.1, 18.4, 18.13, 18.10, 16.5, 14.5, 12.4, 10.6, -2.8, -3.4, -3.95, -3.98, -4.2, -4.3; LRMS (ESI) 1327.8 [M+Na]<sup>+</sup>; HRMS (ESI) calcd for C<sub>78</sub>H<sub>128</sub>O<sub>8</sub>Si<sub>4</sub>Na 1327.8584 [M+Na]<sup>+</sup>, found 1327.8534; [α]<sub>D</sub><sup>20</sup> +6.7 (c 0.65, CHCl<sub>3</sub>).

**(2S,3S,4R,5R,8S,10R,11R,12S,13Z,15S,17S,18S,19E)-3-(4-Methoxybenzyloxy)-5,11,15,17-tetrakis(*tert*-butyldimethylsilyloxy)-2,4,8,10,12,18-hexamethyl-21-(trityloxy)hencosa-13,19-dien-1-ol (69β).**

DIBALH (1.0 M in hexane, 7.4 mL, 7.4 mmol) was added to a stirred solution of TBS protected acetal **68β** (0.97 g, 0.74 mmol) in anhydrous CH<sub>2</sub>Cl<sub>2</sub> (3 mL), under an atmosphere of N<sub>2</sub> at 0 °C dropwise. After stirring for additional 30 min at 0 °C, the reaction mixture was quenched by the careful addition of aqueous sat'd potassium sodium tartrate solution (30 mL) and stirred for 3 h at room temperature. The organic layer was separated, and the aqueous layer was extracted with CH<sub>2</sub>Cl<sub>2</sub> (20 mL). The combined organic layers were washed with brine and dried over MgSO<sub>4</sub> followed by the evaporation of the organic solution under reduced pressure. The residue was purified by column chromatography (EtOAc/hexane 1:9) to obtain **69β** (0.94 g, 97 %) as a colorless oil: IR (CHCl<sub>3</sub>) 3501, 2956, 2929, 2856, 1613, 1514, 1471, 1462, 1251, 1075, 835, 773, 705 cm<sup>-1</sup>; <sup>1</sup>H NMR (300 MHz, CDCl<sub>3</sub>) δ 7.55-7.51 (m, 6H), 7.37-7.25 (m, 11H), 6.94-6.92 (m, 2H), 5.90 (dd, *J* = 15.7, 5.9 Hz, 1H), 5.62 (dt, *J* = 15.6, 5.6 Hz, 1H), 5.56-5.48 (m, 1H), 5.40 (dd, *J* = 11.2, 8.5 Hz, 1H), 4.61 (m, 1H), 4.60 (s, 2H), 3.99 (m, 1H), 3.90 (m, 1H), 3.83 (s, 3H), 3.69 (m, 1H), 3.64 (d, *J* = 5.3 Hz, 1H), 3.53 (m, 1H), 3.31 (m, 1H), 2.99 (m, 1H), 2.70 (m, 1H), 2.47 (m, 1H), 2.00 (m, 2H), 1.65-1.52 (m, 3H), 1.45-1.37 (m, 1H), 1.33 (m, 1H), 1.30 (m, 1H), 1.20 (d, *J* = 6.9 Hz, 3H), 1.10 (d, *J* = 6.6 Hz, 3H), 1.09 (d, *J* = 6.9 Hz, 3H), 1.05 (d, *J* = 7.0 Hz, 3H), 1.00-0.96 (m, 36H), 0.92-0.86 (m, 2H), 0.82 (d, *J* = 6.6 Hz, 3H), 0.76 (d, *J* = 5.5 Hz, 3H), 0.19-0.11 (m, 24H); <sup>13</sup>C NMR (75 MHz, CDCl<sub>3</sub>) δ 159.2, 144.5, 144.4, 134.3, 133.1, 131.5, 130.5, 129.2, 128.6, 127.6, 126.8, 126.4, 113.8, 86.7, 86.0, 81.1, 75.3, 73.6, 72.8, 66.5, 65.1, 65.0, 55.1, 43.0, 42.3, 40.5, 40.0, 36.8, 35.2, 35.1, 34.0, 32.1, 30.4, 26.2, 26.1, 26.0, 25.9, 19.6, 18.9, 18.4,

18.1, 16.5, 15.8, 14.6, 9.9, -2.8, -3.4, -3.5, -3.8, -4.0, -4.2, -4.4; LRMS (ESI) 1329.8 [M+Na]<sup>+</sup>; HRMS (ESI) calcd for C<sub>78</sub>H<sub>130</sub>O<sub>8</sub>Si<sub>4</sub>Na 1329.8741 [M+Na]<sup>+</sup>, found 1329.8778; [α]<sub>D</sub><sup>20</sup> -9.9 (*c* 0.36, CHCl<sub>3</sub>).

**[(2*E*,4*S*,5*S*,7*S*,8*Z*,10*S*,11*R*,12*R*,14*S*,17*R*,18*R*,19*S*,20*S*,21*Z*)-19-(4-Methoxybenzyloxy)-7,11,17-tris(*tert*-butyldimethylsilyloxy)-5-(*tert*-butyldimethylsilyloxy)-4,10,12,14,18,20-hexamethyltetracos-2,8,21,23-tetraenyl]triphenylmethane (70β).**

The alcohol **69β** (0.94 g, 0.72 mmol) in CH<sub>2</sub>Cl<sub>2</sub> (20 mL) was treated with Dess-Martin periodinane (0.46 g, 1.08 mmol). After 1 h, the mixture was quenched with saturated NaHCO<sub>3</sub> (20 mL) and Na<sub>2</sub>S<sub>2</sub>O<sub>3</sub> (20 mL). The aqueous layer was extracted with ethyl ether (20 mL x 2) and the combined extracts were dried over anhydrous MgSO<sub>4</sub>. Filtration and concentration followed by short flash column chromatography (hexane/EtOAc 9:1) to remove Dess-Martin residue provided crude aldehyde as a colorless oil, which was used for the next reaction without further purification. To a stirred solution of the above crude aldehyde and 1-bromoallyl trimethylsilane **29** (0.89 g) in anhydrous THF (18 mL) under an atmosphere of N<sub>2</sub> at room temperature was added CrCl<sub>2</sub> (0.73 g, 5.94 mmol), and the mixture was stirred for additional 14 h at ambient temperature. The reaction mixture was diluted with hexane followed by filtration through celite. After the evaporation of the solvent under reduced pressure, the residue was purified by short silica gel column chromatography (EtOAc/hexane 1:9) as the eluent. The foregoing product in THF (40 mL) was cooled to 0 °C and NaH (95 % w/w, 0.36 g, 14.4 mmol) was added in one portion. The ice bath was removed after 15 min and the mixture was stirred for 2 h at ambient temperature. The reaction mixture was cooled to 0 °C, quenched with H<sub>2</sub>O (5 mL), extracted with ethyl ether (20 mL x 2). The combined organic layers were washed with brine and dried over MgSO<sub>4</sub> followed by the evaporation of the organic solution under reduced pressure. The residue was purified by column chromatography (hexane/EtOAc 49:1) to obtain **70β** (0.81 g, 85 % for 3 steps) as a colorless oil: IR (CHCl<sub>3</sub>) 2955, 2928, 2856, 1614, 1514, 1471, 1462, 1249, 1076, 835, 772, 705 cm<sup>-1</sup>; <sup>1</sup>H NMR (300 MHz, CDCl<sub>3</sub>) δ 7.60-7.56 (m, 6H), 7.43-7.27 (m, 11H), 6.99-6.96 (m, 1H), 6.71 (ddd, *J* = 16.9, 10.6, 10.5 Hz, 1H), 6.14 (t, *J* = 11.0 Hz, 1H), 5.97 (dd, *J* = 15.7, 5.9 Hz, 1H), 5.82-5.77 (m, 1H), 5.74-5.70 (m, 1H), 5.68-5.62 (m, 1H), 5.61-5.56 (m, 1H), 5.46 (dd, *J* = 11.1, 8.6 Hz, 1H), 5.28 (d, *J* = 16.9 Hz, 1H), 5.20 (d, *J* = 10.3 Hz, 1H), 4.66 (m, 3H), 4.05 (m, 1H), 3.86 (s, 3H), 3.76 (m, 1H), 3.69 (d, *J* = 5.2 Hz, 1H), 3.48 (m, 1H), 3.35 (m, 1H), 3.15 (m, 1H), 2.76 (m, 1H), 2.53 (m, 1H), 2.34 (m, 1H), 1.82 (m, 1H), 1.70-1.57 (m, 3H), 1.56-1.32 (m, 3H), 1.25 (d, *J* = 6.8 Hz, 3H), 1.14 (d, *J* = 7.1 Hz, 3H), 1.12 (m, 2H), 1.11 (d, *J* = 7.1 Hz, 3H), 1.08-1.03 (m, 36H), 0.98-0.90 (m, 2H), 0.86 (d, *J* = 6.6 Hz, 3H), 0.76 (d, *J* = 5.1 Hz, 3H), 0.25-0.13 (m, 24H); <sup>13</sup>C NMR (75 MHz, CDCl<sub>3</sub>) δ 159.0, 146.2, 144.6, 144.4, 134.5, 134.3, 133.2, 132.4, 131.4, 130.2, 129.0, 128.7, 127.7, 126.8, 126.5, 117.2, 113.7, 86.7, 84.5, 81.3, 75.1, 72.9, 66.6, 65.2, 55.1, 43.0, 42.3, 40.6, 40.2, 35.6, 35.25, 35.19, 33.9, 32.6, 30.3, 26.3, 26.1, 26.04, 25.99, 19.6, 18.9, 18.4, 18.2, 16.6, 14.7, 9.2, -2.8, -3.36, -3.4, -3.5, -3.9, -4.1, -4.4; LRMS (ESI) 1351.8 [M+Na]<sup>+</sup>; HRMS (ESI) calcd for C<sub>81</sub>H<sub>132</sub>O<sub>7</sub>Si<sub>4</sub>Na 1351.8948 [M+Na]<sup>+</sup>, found 1351.8973; [α]<sub>D</sub><sup>20</sup> +0.4 (*c* 0.51, CHCl<sub>3</sub>).

**(2*E*,4*S*,5*S*,7*S*,8*Z*,10*S*,11*R*,12*R*,14*S*,17*R*,18*R*,19*S*,20*S*,21*Z*)-19-(4-Methoxybenzyloxy)-5,7,11,17-tetrakis(*tert*-butyldimethylsilyloxy)-4,10,12,14,18,20-hexamethyltetracos-2,8,21,23-tetraen-1-ol (71β).**

ZnBr<sub>2</sub> solution (0.42 g in 5 mL CH<sub>2</sub>Cl<sub>2</sub> and 0.8 mL of MeOH) was added to a stirred solution of trityl ether **70β** (0.50 g, 0.38 mmol) in MeOH (3 mL), CH<sub>2</sub>Cl<sub>2</sub> (18 mL) at 0 °C dropwise for 30 min. After 4 h, the reaction mixture was quenched with saturated NaHCO<sub>3</sub> solution (20 mL) and extracted with Et<sub>2</sub>O (10 mL x 2). The organic phase was separated, dried with MgSO<sub>4</sub> and concentrated. The residue was purified by flash chromatography (EtOAc/hexane 1:9) to yield



0.34 g of product **71 $\beta$**  (83 %) as a colorless oil: IR (CHCl<sub>3</sub>) 3410, 2956, 2929, 2856, 1613, 1514, 1471, 1251, 1076, 836, 773 cm<sup>-1</sup>; <sup>1</sup>H NMR (300 MHz, CDCl<sub>3</sub>)  $\delta$  7.31-7.29 (m, 2H), 6.90-6.87 (m, 2H), 6.60 (ddd,  $J$  = 16.8, 10.6, 10.5 Hz, 1H), 6.02 (t,  $J$  = 11.0 Hz, 1H), 5.79 (dd,  $J$  = 15.6, 5.8 Hz, 1H), 5.62 (d,  $J$  = 9.3 Hz, 1H), 5.60 (m, 1H), 5.47 (t,  $J$  = 10.3 Hz, 1H), 5.32 (dd,  $J$  = 10.7, 8.9 Hz, 1H), 5.18 (d,  $J$  = 16.8 Hz, 1H), 5.10 (d,  $J$  = 10.2 Hz, 1H), 4.54 (m, 3H), 4.07 (d,  $J$  = 5.9 Hz, 2H), 3.89 (m, 1H), 3.81 (s, 3H), 3.64 (m, 1H), 3.35 (m, 1H), 3.24 (br, 1H), 3.00 (m, 1H), 2.61 (m, 1H), 2.40 (m, 1H), 1.68 (m, 1H), 1.55-1.42 (m, 3H), 1.38-1.21 (m, 3H), 1.12 (d,  $J$  = 6.7 Hz, 3H), 1.02-0.99 (m, 3H), 0.98 (d,  $J$  = 7.0 Hz, 3H), 0.94-0.89 (m, 40H), 0.79 (d,  $J$  = 6.9 Hz, 3H), 0.76 (d,  $J$  = 6.3 Hz, 3H), 0.11-0.06 (m, 24H); <sup>13</sup>C NMR (75 MHz, CDCl<sub>3</sub>)  $\delta$  159.0, 134.9, 134.5, 133.1, 132.4, 131.5, 131.4, 129.1, 128.9, 128.7, 117.2, 113.7, 84.5, 81.3, 75.1, 72.7, 66.4, 64.1, 55.3, 42.7, 42.0, 40.5, 40.4, 35.5, 35.23, 35.20, 33.9, 32.6, 30.5, 26.3, 26.03, 26.00, 25.96, 19.7, 18.9, 18.8, 18.5, 18.2, 18.1, 16.6, 14.7, 9.2, -2.8, -3.47, -3.53, -4.03, -4.05, -4.2, -4.5, -4.7; LRMS (ESI) 1109.7 [M+Na]<sup>+</sup>; HRMS (ESI) calcd for C<sub>62</sub>H<sub>118</sub>O<sub>7</sub>Si<sub>4</sub>Na 1109.7852 [M+Na]<sup>+</sup>, found 1109.7898; [ $\alpha$ ]<sub>D</sub><sup>20</sup> -2.0 ( $c$  2.6, CHCl<sub>3</sub>).

**(2Z,4E,6S,7S,9S,10Z,12S,13R,14R,16S,19R,20R,21S,22S,23Z)-Methyl-21-(4-methoxybenzyloxy)-7,9,13,19-tetrakis(tert-butyldimethylsilyloxy)-6,12,14,16,20,22-hexamethylhexacos-2,4,10,23,25-pentaenoate (72 $\beta$ ).**

The alcohol **71 $\beta$**  (0.34 g, 0.31 mmol) in CH<sub>2</sub>Cl<sub>2</sub> (20 mL) was treated with Dess-Martin periodinane (0.20 g, 0.47 mmol). After 1 h, the mixture was quenched with saturated NaHCO<sub>3</sub> (5 mL) and Na<sub>2</sub>S<sub>2</sub>O<sub>3</sub> (5 mL). The aqueous layer was extracted with ethyl ether (10 mL x 2) and the combined extracts were dried over anhydrous MgSO<sub>4</sub>. Filtration and concentration followed by short flash column chromatography (hexane/EtOAc 9:1) to remove the Dess-Martin residue provided the crude aldehyde as a colorless oil, which was used for the next reaction without further purification. To a stirred solution of *bis*(2,2,2-trifluoroethyl)-(methoxycarbonylmethyl) phosphate (0.080 mL, 0.37 mmol), 18-crown-6 (0.41 g, 1.55 mmol) in THF (6 mL) cooled to -78 °C was added dropwise potassium *bis*(trimethylsilyl)amide (0.75 mL, 0.37 mmol, 0.5M solution in toluene). Thereafter the above aldehyde in THF (1 mL) was added and the solution was stirred for 4 h at -78 °C. The reaction mixture was quenched by addition of a sat'd NH<sub>4</sub>Cl solution (5 mL) and diluted with diethyl ether (20 mL). The layers were separated and organic phase was washed with brine (30 mL) and dried with MgSO<sub>4</sub>, filtered, and concentrated. The residue was purified by flash chromatography (EtOAc/hexane 1:19) to obtain (*E,Z*)-doubly unsaturated ester **72 $\beta$**  (0.32 g, 90 % for 2 steps) as a colorless oil: IR (CHCl<sub>3</sub>) 2956, 2929, 2885, 1722, 1641, 1514, 1471, 1250, 1174, 1075, 836, 773 cm<sup>-1</sup>; <sup>1</sup>H NMR (300 MHz, CDCl<sub>3</sub>)  $\delta$  7.34 (dd,  $J$  = 15.5, 11.2 Hz, 1H), 7.29-7.26 (m, 2H), 6.87-6.84 (m, 2H), 6.56 (ddd,  $J$  = 17.0, 10.6, 10.5 Hz, 1H), 6.52 (t,  $J$  = 11.4 Hz, 1H), 6.19 (dd,  $J$  = 15.5, 6.4 Hz, 1H), 5.99 (t,  $J$  = 11.0 Hz, 1H), 5.57 (t,  $J$  = 10.5 Hz, 1H), 5.54 (d,  $J$  = 11.3 Hz, 1H), 5.42 (m, 1H), 5.30 (m, 1H), 5.15 (d,  $J$  = 16.8 Hz, 1H), 5.07 (d,  $J$  = 10.1 Hz, 1H), 4.51 (m, 3H), 3.92 (m, 1H), 3.78 (s, 3H), 3.70 (s, 3H), 3.61 (m, 1H), 3.32 (dd,  $J$  = 7.9, 2.8 Hz, 1H), 3.20 (m, 1H), 2.97 (m, 2H), 2.57 (m, 2H), 1.65 (m, 1H), 1.56-1.39 (m, 3H), 1.29-1.16 (m, 3H), 1.10 (d,  $J$  = 6.8 Hz, 3H), 1.03 (d,  $J$  = 6.9 Hz, 3H), 0.98 (d,  $J$  = 7.0 Hz, 3H), 0.94 (d,  $J$  = 6.9 Hz, 3H), 0.93-0.83 (m, 39H), 0.77 (m, 1H), 0.91 (s, 9H), 0.87 (s, 9H), 0.83 (d,  $J$  = 6.4 Hz, 3H), 0.82 (d,  $J$  = 6.0 Hz, 3H), 0.13 (s, 3H), 0.76 (d,  $J$  = 6.6 Hz, 3H), 0.71 (d,  $J$  = 5.9 Hz, 3H), 0.10-0.02 (m, 24H); <sup>13</sup>C NMR (75 MHz, CDCl<sub>3</sub>)  $\delta$  166.8, 159.0, 147.2, 145.6, 134.5, 133.1, 132.4, 131.5, 131.4, 129.0, 128.9, 126.4, 117.1, 115.1, 113.7, 84.4, 81.3, 75.0, 72.8, 72.7, 66.4, 55.2, 50.9, 42.9, 42.6, 40.5, 40.2, 35.3, 35.2, 33.8, 32.6, 30.5, 26.3, 26.0, 25.9, 19.6, 18.9, 18.8, 18.4, 18.2, 18.1, 16.7, 14.5, 9.2, -2.8, -3.4, -3.5, -3.6, -4.07, -4.14, -4.24, -4.49; LRMS (ESI) 1163.8 [M+Na]<sup>+</sup>; HRMS (ESI) calcd for C<sub>65</sub>H<sub>120</sub>O<sub>8</sub>Si<sub>4</sub>Na 1163.7958 [M+Na]<sup>+</sup>, found 1163.8004; [ $\alpha$ ]<sub>D</sub><sup>20</sup> -27.3 ( $c$  5.0, CHCl<sub>3</sub>).

**(2Z,4E,6S,7S,9S,10Z,12S,13R,14R,16S,19R,20R,21S,22S,23Z)-Methyl-7,9,13,19-tetrakis(tert-butyltrimethylsilyloxy)-21-hydroxy-6,12,14,16,20,22-hexamethylhexacos-2,4,10,23,25-pentaenoate (73β).**

The ester **72β** (0.15 g, 0.14 mmol) was added to CH<sub>2</sub>Cl<sub>2</sub> (5 mL) and H<sub>2</sub>O (0.2 mL) and DDQ (34 mg, 0.15 mmol) was added at 0 °C. After 1 h of stirring at 0 °C, the reaction mixture was quenched by adding sat'd NaHCO<sub>3</sub> (5 mL). The organic phase was washed by sat'd NaHCO<sub>3</sub> solution (3 x 10 mL) and brine, dried over MgSO<sub>4</sub> and concentrated. Purification by flash column chromatography (EtOAc/hexane 1:9) furnished **73β** (0.12 g, 90 %) as a colorless oil (**Caution!** Do not use excess DDQ. It will react with the C2-C4 diene to form Diels-Alder adducts): IR (CHCl<sub>3</sub>) 3540, 2956, 2929, 2856, 1641, 1601, 1471, 1462, 1407, 1379, 1361, 1255, 1174, 1089, 1004, 836, 773 cm<sup>-1</sup>; <sup>1</sup>H NMR (300 MHz, CDCl<sub>3</sub>) δ 7.33 (dd, *J* = 15.5, 11.2 Hz, 1H), 6.61 (ddd, *J* = 16.9, 10.5, 10.4 Hz, 1H), 6.51 (t, *J* = 11.4 Hz, 1H), 6.17 (dd, *J* = 15.5, 5.9 Hz, 1H), 6.07 (t, *J* = 11.0 Hz, 1H), 5.54 (d, *J* = 11.3 Hz, 1H), 5.45-5.37 (m, 2H), 5.28 (m, 1H), 5.18 (d, *J* = 16.8 Hz, 1H), 5.09 (d, *J* = 10.1 Hz, 1H), 4.51 (m, 1H), 3.91 (m, 1H), 3.74 (m, 1H), 3.69 (s, 3H), 3.45 (m, 1H), 3.23 (m, 1H), 3.76 (m, 1H), 2.56 (m, 2H), 2.29 (br, 1H), 1.68 (m, 1H), 1.56-1.41 (m, 3H), 1.34-1.17 (m, 3H), 1.02 (d, *J* = 6.9 Hz, 3H), 0.97 (d, *J* = 6.9 Hz, 3H), 0.94 (d, *J* = 6.8 Hz, 3H), 0.90-0.84 (m, 40H), 0.81 (d, *J* = 5.8 Hz, 3H), 0.77 (d, *J* = 6.5 Hz, 3H), 0.76 (d, *J* = 6.2 Hz, 3H), 0.08-0.01 (m, 24H); <sup>13</sup>C NMR (75 MHz, CDCl<sub>3</sub>) δ 166.8, 147.3, 145.5, 135.3, 133.0, 132.3, 131.5, 129.9, 126.4, 117.6, 115.2, 81.3, 77.5, 76.7, 72.7, 66.4, 50.9, 42.9, 42.6, 40.1, 37.9, 36.1, 35.4, 35.2, 33.8, 32.2, 30.6, 26.2, 26.0, 25.9, 19.6, 19.0, 18.4, 18.10, 18.05, 17.7, 16.6, 14.4, 6.9, -2.8, -3.5, -3.6, -3.7, -4.1, -4.15, -4.21, -4.4; LRMS (ESI) 1043.7 [M+Na]<sup>+</sup>; HRMS (ESI) calcd for C<sub>57</sub>H<sub>112</sub>O<sub>7</sub>Si<sub>4</sub>Na 1043.7383 [M+Na]<sup>+</sup>, found 1043.7433; [α]<sub>D</sub><sup>20</sup> -40.3 (c 2.1, CHCl<sub>3</sub>).

**(2Z,4E,6S,7S,9S,10Z,12S,13R,14R,16S,19R,20R,21S,22S,23Z)-7,9,13,19-tetrakis(tert-Butyltrimethylsilyloxy)-21-hydroxy-6,12,14,16,20,22-hexamethylhexacos-2,4,10,23,25-pentaenoic acid (74β).**

1N aqueous KOH solution (1.2 mL) was added to a stirred solution of the above **73β** (0.12 g, 0.12 mmol) in EtOH (12 mL), THF (1 mL) and the mixture was refluxed gently until the ester disappeared (about 5 h) as determined by TLC analysis. The ethanolic solution was concentrated and then diluted with ether (4 mL). After the solution was acidified to pH 3 with 1N HCl solution, organic phase was separated and aqueous phase was extracted with Et<sub>2</sub>O (2 x 5 mL). The combined organic phases were dried with MgSO<sub>4</sub>, concentrated and used without further purification: IR (CHCl<sub>3</sub>) 2957, 2929, 2857, 1692, 1471, 1462, 1254, 1089, 836, 773 cm<sup>-1</sup>; <sup>1</sup>H NMR (300 MHz, CDCl<sub>3</sub>) δ 7.34 (dd, *J* = 15.1, 11.4 Hz, 1H), 6.64 (ddd, *J* = 16.0, 10.8, 10.5 Hz, 1H), 6.61 (t, *J* = 11.2 Hz, 1H), 6.22 (dd, *J* = 15.4, 6.0 Hz, 1H), 6.09 (t, *J* = 11.0 Hz, 1H), 5.58 (d, *J* = 11.3 Hz, 1H), 5.49-5.39 (m, 2H), 5.34-5.28 (m, 1H), 5.20 (d, *J* = 16.7 Hz, 1H), 5.11 (d, *J* = 10.2 Hz, 1H), 4.55 (m, 1H), 3.95 (m, 1H), 3.76 (m, 1H), 3.50 (m, 1H), 3.27 (m, 1H), 2.81 (m, 1H), 2.58 (m, 2H), 1.71 (m, 1H), 1.57-1.50 (m, 3H), 1.44-1.31 (m, 3H), 1.25 (d, *J* = 7.3 Hz, 3H), 1.21 (d, *J* = 6.1 Hz, 3H), 1.04 (d, *J* = 6.9 Hz, 3H), 0.99 (d, *J* = 7.0 Hz, 3H), 0.96-0.89 (m, 40H), 0.81 (d, *J* = 6.2 Hz, 3H), 0.79 (d, *J* = 5.9 Hz, 3H), 0.11-0.05 (m, 24H); <sup>13</sup>C NMR (75 MHz, CDCl<sub>3</sub>) δ 171.1, 148.1, 147.3, 135.2, 132.8, 132.3, 131.6, 129.9, 126.6, 117.6, 115.0, 81.3, 77.6, 72.7, 66.4, 58.3, 43.0, 42.6, 40.1, 37.9, 36.0, 35.4, 35.2, 33.8, 32.2, 30.6, 26.3, 26.0, 25.9, 25.2, 19.6, 19.0, 18.4, 18.09, 18.05, 17.7, 16.6, 14.5, 7.0, -2.8, -3.45, -3.54, -3.7, -4.1, -4.2, -4.4; LRMS (ESI) 1029.7 [M+Na]<sup>+</sup>; HRMS (ESI) calcd for C<sub>56</sub>H<sub>110</sub>O<sub>7</sub>Si<sub>4</sub>Na 1029.7226 [M+Na]<sup>+</sup>, found 1029.7257; [α]<sub>D</sub><sup>20</sup> -41.7 (c 1.4, CHCl<sub>3</sub>).

**8(S),10(S),14(R),20(R)-tetrakis(tert-Butyltrimethylsilyloxy)-7(S),13(S),15(R),17(S),21(S)-pentamethyl-22(S)-(1(S)-methylpenta-2,4-dienyl)oxacyclodocosa-3,5,11-trien-2-one (75β).**

A solution of above acid **74 $\beta$**  in THF (2 mL) was treated at 0 °C with Et<sub>3</sub>N (0.10 mL, 0.72 mmol) and 2,4,6-trichlorobenzoyl chloride (0.095 mL, 0.60 mmol). The reaction mixture was stirred at 0 °C for 30 min and then added to 4-DMAP (60 mL, 0.02 M solution in toluene) at 25 °C and stirred overnight. The reaction mixture was concentrated, Et<sub>2</sub>O (10 mL) was added and the crude was washed with 0.5 N HCl (2 x 10 mL), dried over MgSO<sub>4</sub>. Purification by flash column chromatography (EtOAc/hexane 1:49) furnished macrolactone **75 $\beta$**  (81 mg, 68 % for 2 steps) as a colorless oil along with an impure fraction (31 mg, 21%) containing mostly the 2Z isomer of **75 $\beta$** : **75 $\beta$** , IR (CHCl<sub>3</sub>) 2957, 2929, 2856, 1745, 1715, 1581, 1471, 1369, 1270, 1117, 1082, 836, 773 cm<sup>-1</sup>; <sup>1</sup>H NMR (300 MHz, CDCl<sub>3</sub>)  $\delta$  7.11 (dd, *J* = 15.3, 10.5 Hz, 1H), 6.59 (ddd, *J* = 16.8, 10.7, 10.5 Hz, 1H), 6.22 (dd, *J* = 15.4, 6.0 Hz, 1H), 6.07 (dd, *J* = 15.4, 10.6 Hz, 1H), 5.92 (t, *J* = 10.9 Hz, 1H), 5.70 (d, *J* = 15.4 Hz, 1H), 5.46 (t, *J* = 10.5 Hz, 1H), 5.35-5.27 (m, 2H), 5.20 (d, *J* = 8.4 Hz, 1H), 5.12 (d, *J* = 16.8 Hz, 1H), 5.04 (d, *J* = 10.3 Hz, 1H), 4.53 (m, 1H), 3.91 (m, 1H), 3.41 (m, 1H), 3.19 (m, 1H), 2.94 (m, 1H), 2.55 (m, 2H), 1.94 (m, 1H), 1.40-1.29 (m, 3H), 1.26-1.15 (m, 3H), 1.00-0.85 (m, 52H), 0.74 (d, *J* = 6.7 Hz, 3H), 0.63 (d, *J* = 6.2 Hz, 3H), 0.08-0.00 (m, 24H); <sup>13</sup>C NMR (75 MHz, CDCl<sub>3</sub>)  $\delta$  166.9, 144.93, 144.88, 136.0, 135.0, 133.5, 132.4, 130.7, 129.3, 120.2, 117.2, 80.3, 75.7, 73.9, 72.7, 66.3, 42.4, 41.0, 40.6, 39.3, 36.5, 35.8, 35.1, 34.5, 31.9, 29.7, 26.2, 26.0, 25.9, 21.6, 19.8, 19.7, 18.4, 18.11, 18.07, 17.9, 14.9, 11.3, -2.6, -3.6, -3.8, -4.2, -4.5, -4.6; LRMS (ESI) 1011.8 [M+Na]<sup>+</sup>; HRMS (ESI) calcd for C<sub>56</sub>H<sub>108</sub>O<sub>6</sub>Si<sub>4</sub>Na 1011.7121 [M+Na]<sup>+</sup>, found 1011.7148; [ $\alpha$ ]<sub>D</sub><sup>20</sup> -16.9 (*c* 1.24, CHCl<sub>3</sub>). 2Z isomer of **75 $\beta$** , <sup>1</sup>H NMR (300 MHz, CDCl<sub>3</sub>)  $\delta$  7.35 (dd, *J* = 11.2, 15.5 Hz, 1H), 6.63 (dt, *J* = 10.5, 16.8 Hz, 1H), 6.44 (t, *J* = 11.3 Hz, 1H), 6.01-5.80 (m, 2H), 5.57 (t, *J* = 10.6 Hz, 1H), 5.50 (d, *J* = 11.4 Hz, 1H), 5.38 (t, *J* = 10.3 Hz, 1H), 5.30 (dd, *J* = 8.5, 11.0 Hz, 1H), 5.22-5.01 (m, 3H), 4.47 (m, 1H), 3.77 (m, 1H), 3.48 (m, 1H), 3.30 (m, 1H), 2.97 (m, 1H), 2.56 (m, 1H), 2.44 (m, 1H), 1.91 (m, 1H), 1.65 (m, 1H), 1.52-0.71 (m, 63H), 0.12-0.04 (m, 24H).

**8(S),10(S),14(R),20(R)-Tetrahydroxy-7(S),13(S),15(R),17(S),21(S)-pentamethyl-22(S)-(1(S)-methyl-penta-2,4-dienyl)-oxa-cyclodocosa-3(E),5(E),11(Z)-trien-2-one (76).**

3 N HCl (3 mL from a solution prepared by adding 2.5 mL of conc. HCl to 7.5 mL MeOH) was added to a stirred solution of the above macrolactone **75 $\beta$**  (81 mg, 0.082 mmol) in THF (1 mL) at 0 °C. After 24 h at room temperature, the reaction mixture was diluted with EtOAc (4 mL) and H<sub>2</sub>O (4 mL) and the organic phase was separated and aqueous phase was extracted with EtOAc (2 x 4 mL). The combined organic phases were washed with sat'd NaHCO<sub>3</sub> (10 mL), dried with MgSO<sub>4</sub>, concentrated and the residue was purified by flash chromatography (EtOAc/hexane 3:2) to yield the product **76** (6.6 mg, 15%) as a colorless oil: IR (CHCl<sub>3</sub>) 3404, 2962, 2916, 1692, 1639, 1455, 1244, 1061, 1001 cm<sup>-1</sup>; <sup>1</sup>H NMR (600 MHz, CD<sub>3</sub>OD)  $\delta$  7.15 (dd, *J* = 15.3, 10.5 Hz, 1H), 6.64 (ddd, *J* = 16.8, 10.6, 10.3 Hz, 1H), 6.29 (dd, *J* = 15.4, 6.3 Hz, 1H), 6.22 (dd, *J* = 15.5, 10.5 Hz, 1H), 5.92 (t, *J* = 10.9 Hz, 1H), 5.72 (d, *J* = 15.3 Hz, 1H), 5.44-5.37 (m, 2H), 5.25 (t, *J* = 10.3 Hz, 1H), 5.13 (dd, *J* = 16.8, 1.8 Hz, 1H), 5.06 (d, *J* = 10.8 Hz, 1H), 5.04 (dd, *J* = 9.1, 1.8 Hz, 1H), 4.68 (ddd, *J* = 9.9, 7.2, 2.4 Hz, 1H), 3.82 (ddd, *J* = 9.2, 6.2, 2.7 Hz, 1H), 3.40 (ddd, *J* = 10.2, 6.2, 2.3 Hz, 1H), 3.06 (m, 1H), 2.99 (dd, *J* = 8.0, 3.3 Hz, 1H), 2.62 (m, 1H), 2.58 (m, 1H), 1.88 (m, 1H), 1.62 (m, 1H), 1.55 (ddd, *J* = 14.0, 10.5, 2.7 Hz, 1H), 1.38 (ddd, *J* = 12.3, 9.6, 2.7 Hz, 1H), 1.34-1.23 (m, 4H), 1.12 (d, *J* = 7.0 Hz, 3H), 1.06 (d, *J* = 6.9 Hz, 3H), 1.04 (d, *J* = 6.9 Hz, 3H), 1.00 (d, *J* = 6.7 Hz, 3H), 0.95-0.88 (m, 2H), 0.87-0.82 (m, 1H), 0.79 (d, *J* = 5.3 Hz, 3H), 0.68 (d, *J* = 6.7 Hz, 3H); <sup>13</sup>C NMR (150 MHz, CD<sub>3</sub>OD)  $\delta$  168.5, 147.7, 147.4, 135.7, 134.4, 133.6, 131.7, 130.8, 129.1, 120.7, 118.0, 80.7, 76.9, 74.2, 72.8, 65.9, 44.0, 42.5, 40.9, 39.5, 36.5, 36.3, 36.1, 35.5, 31.7, 31.2, 21.1, 19.0, 17.9, 17.7, 15.7, 11.3; LRMS (ESI) 555.6 [M+Na]<sup>+</sup>; HRMS (ESI) calcd for C<sub>32</sub>H<sub>52</sub>O<sub>6</sub> 555.3662 [M+Na]<sup>+</sup>, found 555.3684; [ $\alpha$ ]<sub>D</sub><sup>20</sup> -6.5 (*c* 0.17, MeOH).

**(4*S*,5*S*)-4-((2*R*,3*S*,6*S*,8*R*,9*R*,10*S*,11*Z*,13*S*,15*S*,16*S*,17*E*)-3,9,13,15-tetrakis(*tert*-butyldimethylsilyloxy)-6,8,10,16-tetramethyl-19-(trityloxy)nonadeca-11,17-dien-2-yl)-2-(4-methoxyphenyl)-5-methyl-1,3-dioxane (68 $\alpha$ ).**

The same procedure for **68 $\beta$**  was used with above **67 $\alpha$**  (0.60 g, 0.50 mmol), TBSOTf (0.17 mL, 0.75 mmol) and 2,6-lutidine (0.12 mL, 1.0 mmol) to yield 0.61 g (93 %) of the product by flash column chromatography (EtOAc/hexane 1:9) as a colorless oil: IR (CHCl<sub>3</sub>) 2956, 2928, 2856, 1518, 1471, 1462, 1251, 1075, 835, 773 cm<sup>-1</sup>; <sup>1</sup>H NMR (300 MHz, CDCl<sub>3</sub>)  $\delta$  7.56-7.48 (m, 8H), 7.38-7.26 (m, 9H), 6.97-6.94 (m, 1H), 5.91 (dd,  $J$  = 15.6, 5.9 Hz, 1H), 5.63 (dt,  $J$  = 15.7, 5.3 Hz, 1H), 5.58-5.50 (m, 1H), 5.52 (s, 1H), 5.41 (dd,  $J$  = 10.8, 8.6 Hz, 1H), 4.65 (m, 1H), 4.19 (dd,  $J$  = 11.1, 4.5 Hz, 1H), 4.01 (m, 1H), 3.90 (m, 1H), 3.84 (s, 3H), 3.66 (d,  $J$  = 5.0 Hz, 2H), 3.56 (t,  $J$  = 11.1 Hz, 1H), 3.36 (m, 1H), 2.71 (m, 1H), 2.48 (m, 1H), 2.12 (m, 1H), 1.88 (m, 1H), 1.76-1.56 (m, 3H), 1.52-1.42 (m, 2H), 1.40-1.31 (m, 2H), 1.09 (d,  $J$  = 7.7 Hz, 3H), 1.07 (d,  $J$  = 7.5 Hz, 3H), 1.05-0.94 (m, 42H), 0.93-0.90 (m, 2H), 0.86 (d,  $J$  = 6.6 Hz, 3H), 0.81 (d,  $J$  = 6.3 Hz, 3H), 0.21-0.13 (m, 24H); <sup>13</sup>C NMR (75 MHz, CDCl<sub>3</sub>)  $\delta$  159.7, 144.6, 144.4, 134.4, 133.0, 131.9, 131.8, 128.7, 127.7, 127.3, 126.8, 126.4, 113.4, 100.8, 86.7, 81.6, 81.3, 73.4, 72.8, 72.0, 66.6, 65.2, 55.1, 43.1, 42.3, 39.7, 38.2, 35.4, 35.3, 31.3, 30.8, 30.7, 30.3, 26.2, 26.1, 26.04, 25.97, 19.5, 18.8, 18.4, 18.1, 16.6, 14.6, 12.2, 9.1, -2.8, -3.4, -3.6, -3.9, -4.0, -4.1, -4.3; LRMS (ESI) 1327.9 [M+Na]<sup>+</sup>; HRMS (ESI) calcd for C<sub>78</sub>H<sub>128</sub>O<sub>8</sub>Si<sub>4</sub>Na 1327.8584 [M+Na]<sup>+</sup>, found 1327.8622; [ $\alpha$ ]<sub>D</sub><sup>20</sup> +5.9 ( $c$  0.3, CHCl<sub>3</sub>).

**(2*S*,3*S*,4*R*,5*S*,8*S*,10*R*,11*R*,12*S*,13*Z*,15*S*,17*S*,18*S*,19*E*)-3-(4-Methoxybenzyloxy)-5,11,15,17-tetrakis(*tert*-butyldimethylsilyloxy)-2,4,8,10,12,18-hexamethyl-21-(trityloxy)hencosa-13,19-dien-1-ol (69 $\alpha$ ).**

The procedure for **69 $\beta$**  was used with **68 $\alpha$**  (0.61 g, 0.47 mmol), DIBALH (4.6 mL, 4.6 mmol) to yield 0.53 g (87 %) of the product by flash column chromatography (EtOAc/hexane 1:19) as a colorless oil: IR (CHCl<sub>3</sub>) 3453, 2956, 2929, 1514, 1471, 1251, 1075, 835, 773 cm<sup>-1</sup>; <sup>1</sup>H NMR (300 MHz, CDCl<sub>3</sub>)  $\delta$  7.56-7.52 (m, 6H), 7.38-7.26 (m, 11H), 6.96-6.93 (m, 2H), 5.91 (dd,  $J$  = 15.7, 6.0 Hz, 1H), 5.64 (dt,  $J$  = 15.4, 5.5 Hz, 1H), 5.55-5.50 (m, 1H), 5.42 (dd,  $J$  = 11.1, 8.4 Hz, 1H), 4.70-4.58 (m, 3H), 4.01 (m, 1H), 3.83 (s, 3H), 3.79 (m, 2H), 3.67-3.61 (m, 3H), 3.35 (m, 1H), 3.30 (m, 1H), 2.72 (m, 1H), 2.48 (m, 1H), 1.93 (m, 2H), 1.76-1.55 (m, 3H), 1.51-1.26 (m, 1H), 1.10 (d,  $J$  = 6.6 Hz, 3H), 1.09 (d,  $J$  = 6.6 Hz, 3H), 1.07 (d,  $J$  = 6.7 Hz, 3H), 1.01-0.98 (m, 39H), 0.93-0.89 (m, 2H), 0.86 (d,  $J$  = 6.6 Hz, 3H), 0.78 (d,  $J$  = 4.6 Hz, 3H), 0.21-0.13 (m, 24H); <sup>13</sup>C NMR (75 MHz, CDCl<sub>3</sub>)  $\delta$  159.2, 144.5, 144.4, 134.3, 133.1, 131.7, 130.6, 129.1, 128.6, 127.6, 126.8, 126.7, 126.4, 113.8, 86.7, 85.1, 81.3, 74.9, 74.4, 72.8, 66.5, 65.9, 65.1, 55.1, 43.0, 42.3, 41.8, 40.1, 38.4, 35.3, 35.1, 32.8, 30.7, 30.5, 26.2, 26.1, 26.0, 25.9, 19.5, 18.6, 18.4, 18.13, 18.10, 16.5, 15.4, 14.6, 10.5, -2.8, -3.4, -3.6, -3.9, -4.0, -4.2, -4.4; LRMS (ESI) 1329.8 [M+Na]<sup>+</sup>; HRMS (ESI) calcd for C<sub>78</sub>H<sub>130</sub>O<sub>8</sub>Si<sub>4</sub>Na 1329.8741 [M+Na]<sup>+</sup>, found 1329.8788; [ $\alpha$ ]<sub>D</sub><sup>20</sup> -9.8 ( $c$  2.6, CHCl<sub>3</sub>).

**[(2*E*,4*S*,5*S*,7*S*,8*Z*,10*S*,11*R*,12*R*,14*S*,17*S*,18*R*,19*S*,20*S*,21*Z*)-19-(4-Methoxybenzyloxy)-5,7,11,17-tetrakis(*tert*-butyldimethylsilyloxy)-4,10,12,14,18,20-hexamethyltetracos-2,8,21,23-tetraenyloxy]triphenylmethane (70 $\alpha$ ).**

The procedure for **70 $\beta$**  was used with **69 $\alpha$**  (0.52 g, 0.40 mmol), Dess-Martin reagent (0.25 g, 0.59 mmol) and 1-bromoallyl trimethylsilane (0.49 g, 2.0 mmol), CrCl<sub>2</sub> (0.41 g, 3.32 mmol) and NaH (0.20 g, 8.0 mmol) to yield 0.46 g (88 %) of the product by flash column chromatography (EtOAc/hexane 1:19) as a colorless oil: IR (CHCl<sub>3</sub>) 2956, 2856, 1614, 1514, 1471, 1249, 1074, 835, 773 cm<sup>-1</sup>; <sup>1</sup>H NMR (300 MHz, CDCl<sub>3</sub>)  $\delta$  7.59-7.56 (m, 6H), 7.41-7.27 (m, 11H), 6.98-6.95 (m, 2H), 6.71 (ddd,  $J$  = 16.7, 10.6, 10.5 Hz, 1H), 6.14 (t,  $J$  = 11.0 Hz, 1H), 5.94 (dd,  $J$  = 15.6, 5.6 Hz, 1H), 5.80-5.67 (m, 2H), 5.64-5.55 (m, 1H), 5.46 (dd,  $J$  = 11.0, 8.5 Hz, 1H), 5.31 (d,  $J$  = 16.8

Hz, 1H), 5.21 (d,  $J = 10.2$  Hz, 1H), 4.70-4.62 (m, 3H), 4.04 (m, 1H), 3.86 (s, 3H), 3.69 (d,  $J = 4.7$  Hz, 1H), 3.34 (m, 2H), 2.96 (m, 1H), 2.77 (m, 1H), 2.51 (m, 1H), 1.93 (m, 1H), 1.78 (m, 1H), 1.75-1.63 (m, 3H), 1.57-1.31 (m, 5H), 1.21 (d,  $J = 6.7$  Hz, 3H), 1.15 (d,  $J = 6.1$  Hz, 3H), 1.12 (d,  $J = 6.7$  Hz, 3H), 1.00 (d,  $J = 7.3$  Hz, 3H), 1.05-1.01 (m, 36H), 0.96-0.93 (m, 2H), 0.89 (d,  $J = 6.7$  Hz, 3H), 0.81 (d,  $J = 5.3$  Hz, 3H), 0.25-0.11 (m, 24H);  $^{13}\text{C}$  NMR (75 MHz,  $\text{CDCl}_3$ )  $\delta$  159.1, 146.2, 144.6, 144.4, 134.4, 134.3, 132.2, 131.3, 130.2, 129.0, 128.7, 127.7, 126.8, 126.5, 117.5, 113.7, 86.7, 84.9, 81.4, 74.9, 73.1, 72.9, 66.6, 65.2, 55.1, 43.1, 42.9, 42.3, 40.4, 35.9, 35.6, 35.3, 35.1, 34.5, 30.2, 29.4, 26.3, 26.1, 26.0, 19.6, 18.8, 18.6, 18.5, 18.2, 18.14, 18.11, 16.5, 14.7, 10.5, -1.1, -2.8, -3.0, -3.3, -3.5, -3.9, -4.2, -4.3; LRMS (ESI) 1351.8  $[\text{M}+\text{Na}]^+$ ; HRMS (ESI) calcd for  $\text{C}_{81}\text{H}_{132}\text{O}_7\text{Si}_4\text{Na}$  1351.8948  $[\text{M}+\text{Na}]^+$ , found 1351.8998;  $[\alpha]_{\text{D}}^{20} -9.3$  ( $c$  1.5,  $\text{CHCl}_3$ ).

**(2E,4S,5S,7S,8Z,10S,11R,12R,14S,17S,18R,19S,20S,21Z)-19-(4-Methoxybenzyloxy)-5,7,11,17-tetrakis(tert-butyldimethylsilyloxy)-4,10,12,14,18,20-hexamethyltetracos-2,8,21,23-tetraen-1-ol (71 $\alpha$ ).**

The procedure for **71 $\beta$**  was used with **70 $\alpha$**  (0.33 g, 0.25 mmol) and ZnBr (0.28 g, 1.25 mmol) to yield 0.18 g (65 %) of the product by flash column chromatography (EtOAc/hexane 1:9) as a colorless oil: IR ( $\text{CHCl}_3$ ) 3417, 2956, 2856, 1613, 1514, 1471, 1250, 1074, 836, 773  $\text{cm}^{-1}$ ;  $^1\text{H}$  NMR (300 MHz,  $\text{CDCl}_3$ )  $\delta$  7.31-7.27 (m, 2H), 6.90-6.87 (m, 2H), 6.60 (ddd,  $J = 16.9, 10.6, 10.5$  Hz, 1H), 6.04 (t,  $J = 11.0$  Hz, 1H), 5.81 (dd,  $J = 15.7, 5.9$  Hz, 1H), 5.67-5.60 (m, 2H), 5.51-5.44 (m, 1H), 5.34 (dd,  $J = 11.2, 8.7$  Hz, 1H), 5.21 (d,  $J = 16.8$  Hz, 1H), 5.12 (d,  $J = 10.2$  Hz, 1H), 4.60-4.52 (m, 3H), 4.10 (d,  $J = 5.7$  Hz, 1H), 3.91 (m, 1H), 3.81 (s, 3H), 3.59 (m, 1H), 3.31-3.23 (m, 2H), 2.86 (m, 1H), 2.65 (m, 1H), 2.40 (m, 1H), 1.82 (m, 1H), 1.66-1.42 (m, 5H), 1.36-1.20 (m, 3H), 1.11 (d,  $J = 6.8$  Hz, 3H), 1.03 (d,  $J = 7.3$  Hz, 3H), 1.01 (d,  $J = 6.6$  Hz, 3H), 0.99 (d,  $J = 5.8$  Hz, 3H), 0.94-0.89 (m, 38H), 0.84 (d,  $J = 7.2$  Hz, 3H), 0.82 (d,  $J = 6.4$  Hz, 3H), 0.13-0.00 (m, 24H);  $^{13}\text{C}$  NMR (75 MHz,  $\text{CDCl}_3$ )  $\delta$  159.0, 135.0, 134.5, 133.2, 132.2, 131.5, 131.4, 129.1, 129.0, 128.7, 117.4, 113.7, 84.8, 81.4, 74.8, 73.1, 72.7, 66.5, 64.1, 55.2, 42.8, 42.7, 42.0, 40.4, 35.9, 35.4, 35.2, 34.4, 30.3, 29.4, 26.3, 26.03, 26.97, 25.95, 19.6, 18.7, 18.6, 18.5, 18.1, 16.6, 14.7, 10.5, -2.8, -3.4, -3.5, -4.0, -4.1, -4.2, -4.3, -4.4; LRMS (ESI) 1109.8  $[\text{M}+\text{Na}]^+$ ; HRMS (ESI) calcd for  $\text{C}_{62}\text{H}_{118}\text{O}_7\text{Si}_4\text{Na}$  1109.7852  $[\text{M}+\text{Na}]^+$ , found 1109.7874;  $[\alpha]_{\text{D}}^{20} -15.0$  ( $c$  0.94,  $\text{CHCl}_3$ ).

**(2Z,4E,6S,7S,9S,10Z,12S,13R,14R,16S,19S,20R,21S,22S,23Z)-Methyl-21-(4-methoxybenzyloxy)-7,9,13,19-tetrakis(tert-butyldimethylsilyloxy)-6,12,14,16,20,22-hexamethylhexacos-2,4,10,23,25-pentaenoate (72 $\alpha$ ).**

The procedure for **72 $\beta$**  was used with **71 $\alpha$**  (0.18 g, 0.16 mmol), Dess-Martin reagent (0.10 g, 0.24 mmol) and *bis*(2,2,2-trifluoroethyl)-(methoxycarbonylmethyl) phosphate (0.041 mL, 0.19 mmol), 18-crown-6 (0.21 g, 0.19 mmol) and KHMDS (0.39 mL, 0.19 mmol) to yield 0.16 g (84 %) of the product by flash column chromatography (EtOAc/hexane 1:19) as a colorless oil: IR ( $\text{CHCl}_3$ ) 2956, 2929, 2856, 1721, 1514, 1462, 1250, 1174, 1074, 836, 773  $\text{cm}^{-1}$ ;  $^1\text{H}$  NMR (300 MHz,  $\text{CDCl}_3$ )  $\delta$  7.38 (dd,  $J = 15.4, 11.2$  Hz, 1H), 7.32-7.29 (m, 2H), 6.91-6.86 (m, 2H), 6.60 (ddd,  $J = 17.0, 10.6, 10.5$  Hz, 1H), 6.56 (t,  $J = 11.3$  Hz, 1H), 6.23 (dd,  $J = 15.5, 5.9$  Hz, 1H), 6.05 (t,  $J = 11.0$  Hz, 1H), 5.68-5.56 (m, 2H), 5.50-5.43 (m, 1H), 5.38-5.31 (m, 1H), 5.23 (d,  $J = 16.8$  Hz, 1H), 5.12 (d,  $J = 10.2$  Hz, 1H), 4.61-4.52 (m, 3H), 3.98 (m, 1H), 3.81 (s, 3H), 3.73 (s, 3H), 3.59 (m, 1H), 3.29-3.23 (m, 2H), 2.86 (m, 1H), 2.68-2.59 (m, 2H), 1.83 (m, 1H), 1.63-1.51 (m, 2H), 1.49-1.35 (m, 3H), 1.34-1.22 (m, 2H), 1.12 (d,  $J = 6.8$  Hz, 3H), 1.07 (d,  $J = 6.9$  Hz, 3H), 1.03 (d,  $J = 5.0$  Hz, 3H), 1.01 (d,  $J = 6.7$  Hz, 3H), 0.94-0.89 (m, 38H), 0.84 (d,  $J = 6.6$  Hz, 3H), 0.80 (d,  $J = 6.1$  Hz, 3H), 0.14-0.00 (m, 24H);  $^{13}\text{C}$  NMR (75 MHz,  $\text{CDCl}_3$ )  $\delta$  166.8, 159.1, 147.2, 145.7, 134.4, 133.2, 132.2, 131.6, 131.4, 129.2, 129.0, 126.4, 117.5, 115.2, 113.7, 84.7, 81.5, 74.9, 73.0, 72.7, 66.4, 55.2, 50.9, 42.9, 42.8, 42.6, 40.3, 35.9, 35.4, 35.2, 34.4, 30.4, 29.5, 26.3,

26.03, 25.98, 19.6, 18.8, 18.7, 18.5, 18.1, 16.7, 14.5, 10.5, -2.8, -3.3, -3.5, -4.0, -4.1, -4.17, -4.22, -4.4; LRMS (ESI) 1163.8 [M+Na]<sup>+</sup>; HRMS (ESI) calcd for C<sub>65</sub>H<sub>120</sub>O<sub>8</sub>Si<sub>4</sub>Na 1163.7958 [M+Na]<sup>+</sup>, found 1163.7981; [α]<sub>D</sub><sup>20</sup> -45.3 (*c* 0.36, CHCl<sub>3</sub>).

**(2Z,4E,6S,7S,9S,10Z,12S,13R,14R,16S,19S,20R,21S,22S,23Z)-Methyl-7,9,13,19-tetrakis(tert-butyl)dimethylsilyloxy)-21-hydroxy-6,12,14,16,20,22-hexamethylhexacos-2,4,10,23,25-pentaenoate (73α).**

The procedure for **73β** was used with **72α** (0.16 g, 0.14 mmol) and DDQ (0.034 g, 0.15 mmol) to yield 0.13 g (90 %) of the product by flash column chromatography (EtOAc/hexane 1:19) as a colorless oil: IR (CHCl<sub>3</sub>) 3512, 2956, 2929, 2857, 1772, 1639, 1471, 1462, 1255, 1193, 1076, 836, 773 cm<sup>-1</sup>; <sup>1</sup>H NMR (300 MHz, CDCl<sub>3</sub>) δ 7.35 (dd, *J* = 15.4, 11.2 Hz, 1H), 6.61 (ddd, *J* = 16.9, 10.6, 10.5 Hz, 1H), 6.53 (t, *J* = 11.3 Hz, 1H), 6.19 (dd, *J* = 15.6, 6.0 Hz, 1H), 6.09 (t, *J* = 11.0 Hz, 1H), 5.56 (d, *J* = 11.3 Hz, 1H), 5.44 (t, *J* = 11.0 Hz, 1H), 5.31 (dd, *J* = 11.0, 8.4 Hz, 1H), 5.19 (d, *J* = 16.8 Hz, 1H), 5.10 (d, *J* = 10.1 Hz, 1H), 4.55 (m, 1H), 3.94 (m, 1H), 3.71 (s, 3H), 3.25 (m, 2H), 2.75 (m, 1H), 2.58 (m, 2H), 1.72 (m, 1H), 1.67-1.60 (m, 1H), 1.59-1.49 (m, 2H), 1.40 (m, 1H), 1.32-1.25 (m, 2H), 1.22-1.13 (m, 2H), 1.04 (d, *J* = 7.0 Hz, 3H), 1.01 (d, *J* = 7.1 Hz, 3H), 0.99 (d, *J* = 6.8 Hz, 3H), 0.91-0.86 (m, 4H), 0.81 (d, *J* = 6.5 Hz, 3H), 0.79 (d, *J* = 6.0 Hz, 3H), 0.11-0.05 (m, 24H); <sup>13</sup>C NMR (75 MHz, CDCl<sub>3</sub>) δ 166.8, 147.2, 145.6, 136.4, 133.2, 132.6, 131.5, 129.5, 126.4, 117.3, 115.2, 81.3, 78.6, 74.3, 72.7, 66.4, 50.9, 42.9, 42.6, 39.7, 36.2, 35.8, 35.4, 35.3, 34.1, 32.4, 30.6, 26.3, 26.0, 25.9, 19.6, 19.2, 18.5, 18.1, 18.0, 17.4, 16.7, 14.5, 10.9, -2.8, -3.4, -3.5, -4.06, -4.11, -4.2, -4.3, -4.4; LRMS (ESI) 1043.7 [M+Na]<sup>+</sup>; HRMS (ESI) calcd for C<sub>57</sub>H<sub>112</sub>O<sub>7</sub>Si<sub>4</sub>Na 1043.7383 [M+Na]<sup>+</sup>, found 1043.7424; [α]<sub>D</sub><sup>20</sup> -37.8 (*c* 1.4, CHCl<sub>3</sub>).

**(2Z,4E,6S,7S,9S,10Z,12S,13R,14R,16S,19S,20R,21S,22S,23Z)-7,9,13,19-tetrakis(tert-butyl)dimethylsilyloxy)-21-hydroxy-6,12,14,16,20,22-hexamethylhexacos-2,4,10,23,25-pentaenoic acid (75α).**

The procedure for **75β** was used with **73α** (0.13 g, 0.13 mmol) and 1N KOH (1.2 mL, 1.3 mmol), 2,4,6-trichlorobenzoyl chloride (0.094 mL, 0.60 mmol) and Et<sub>3</sub>N (0.10 mL, 0.78 mmol), 4-DMAP (60 mL, 1.3 mmol) to yield 0.054 g (45 % for 2 steps) of the product by flash column chromatography (EtOAc/hexane 1:19) as a colorless oil: (seco acid) IR (CHCl<sub>3</sub>) 2956, 2857, 1692, 1634, 1471, 1462, 1254, 1076, 836, 773 cm<sup>-1</sup>; <sup>1</sup>H NMR (300 MHz, CDCl<sub>3</sub>) δ 7.34 (dd, *J* = 15.2, 11.3 Hz, 1H), 6.66 (ddd, *J* = 16.8, 10.8, 10.6 Hz, 1H), 6.62 (t, *J* = 11.3 Hz, 1H), 6.23 (dd, *J* = 15.3, 6.0 Hz, 1H), 6.09 (t, *J* = 11.0 Hz, 1H), 5.57 (d, *J* = 11.2 Hz, 1H), 5.48-5.42 (m, 1H), 5.35-5.28 (m, 1H), 5.20 (d, *J* = 16.8 Hz, 1H), 5.10 (d, *J* = 10.2 Hz, 1H), 4.55 (m, 1H), 3.95 (m, 1H), 3.74 (m, 1H), 3.26 (m, 1H), 2.78 (m, 1H), 2.58 (m, 2H), 1.75-1.64 (m, 2H), 1.62-1.49 (m, 3H), 1.44-1.37 (m, 1H), 1.32-1.19 (m, 3H), 1.04 (d, *J* = 7.0 Hz, 3H), 1.01 (d, *J* = 7.0 Hz, 3H), 1.00 (d, *J* = 6.4 Hz, 3H), 0.95-0.86 (m, 4H), 0.82 (d, *J* = 7.1 Hz, 3H), 0.81 (d, *J* = 6.4 Hz, 3H), 0.12-0.05 (m, 24H); <sup>13</sup>C NMR (75 MHz, CDCl<sub>3</sub>) δ 171.5, 148.3, 147.4, 136.4, 133.1, 132.6, 131.5, 129.5, 126.6, 117.3, 115.0, 81.3, 78.6, 74.3, 72.7, 66.4, 43.0, 42.7, 39.7, 36.2, 35.8, 35.5, 35.3, 34.1, 32.4, 30.6, 26.3, 26.0, 25.94, 25.92, 19.6, 19.2, 18.5, 18.1, 18.0, 17.4, 16.7, 14.5, 11.0, -2.8, -3.4, -3.5, -4.1, -4.25, -4.32, -4.7; LRMS (ESI) 1029.7 [M+Na]<sup>+</sup>; HRMS (ESI) calcd for C<sub>56</sub>H<sub>110</sub>O<sub>7</sub>Si<sub>4</sub>Na 1029.7226 [M+Na]<sup>+</sup>, found 1029.7252; [α]<sub>D</sub><sup>20</sup> -32.7 (*c* 0.51, CHCl<sub>3</sub>).

**8(S),10(S),14(R),20(S)-Tetrahydroxy-7(S),13(S),15(R),17(S),21(S)-pentamethyl-22(S)-(1(S)-methyl-penta-2,4-dienyl)oxacyclodocosa-3(Z),5(E),11(Z)-trien-2-one (37) and 8(S),10(S),14(R),20(S)-Tetrahydroxy-7(S),13(S),15(R),17(S),21(S)-pentamethyl-22(S)-(1(S)-methyl-penta-2,4-dienyl)oxacyclodocosa-3(E),5(E),11(Z)-trien-2-one (77).**

The procedure for **76 $\beta$**  was used with **75 $\alpha$**  (0.054 g, 0.054 mmol) in 3N HCl (5 mL) and THF (2 mL) to yield 13 mg (45 %) of **37** and 4.5 mg (15 %) of **77** by flash column chromatography (EtOAc/hexane 7:3) as a colorless oil: (**37**) IR (CHCl<sub>3</sub>) 3416, 2961, 2927, 2873, 1692, 1635, 1455, 1421, 1379, 1190, 1086, 998 cm<sup>-1</sup>; <sup>1</sup>H NMR (600 MHz, CD<sub>3</sub>OD)  $\delta$  7.26 (dd,  $J$  = 15.2, 11.3 Hz, 1H), 6.65 (ddd,  $J$  = 16.8, 10.6, 10.3 Hz, 1H), 6.56 (t,  $J$  = 11.3 Hz, 1H), 5.97 (t,  $J$  = 10.9 Hz, 1H), 5.91 (dd,  $J$  = 15.2, 9.3 Hz, 1H), 5.49 (d,  $J$  = 10.7 Hz, 1H), 5.42 (t,  $J$  = 8.6 Hz, 1H), 5.20 (t,  $J$  = 10.4 Hz, 1H), 5.15 (dd,  $J$  = 16.9, 1.3 Hz, 1H), 5.08 (d,  $J$  = 10.1 Hz, 1H), 5.05 (dd,  $J$  = 9.6, 1.3 Hz, 1H), 4.62 (ddd,  $J$  = 11.5, 7.7, 4.3 Hz, 1H), 3.65 (ddd,  $J$  = 10.0, 7.3, 3.1 Hz, 1H), 3.07 (dd,  $J$  = 6.7, 4.0 Hz, 1H), 3.01 (m, 1H), 2.66 (m, 1H), 2.26 (m, 1H), 1.90 (m, 1H), 1.66 (ddd,  $J$  = 11.5, 8.4, 3.4 Hz, 1H), 1.49 (ddd,  $J$  = 14.1, 10.0, 4.0 Hz, 1H), 1.45 (m, 1H), 1.38 (m, 1H), 1.32 (m, 1H), 1.27 (m, 1H), 1.11 (d,  $J$  = 6.7 Hz, 3H), 1.06 (m, 1H), 1.03 (ddd,  $J$  = 11.3, 7.2, 4.4 Hz, 3H), 1.01 (d,  $J$  = 6.9 Hz, 3H), 0.99 (d,  $J$  = 6.7 Hz, 3H), 0.96 (d,  $J$  = 7.0 Hz, 3H), 0.93 (m, 1H), 0.89 (m, 1H), 0.85 (d,  $J$  = 6.7 Hz, 3H), 0.75 (d,  $J$  = 5.9 Hz, 3H); <sup>13</sup>C NMR (150 MHz, CD<sub>3</sub>OD)  $\delta$  168.1, 148.7, 146.6, 135.7, 134.0, 133.7, 132.9, 131.1, 128.2, 118.0, 117.0, 80.9, 78.4, 74.4, 72.4, 66.3, 46.4, 43.4, 42.5, 40.9, 36.3, 35.90, 35.88, 35.7, 31.8, 31.5, 19.9, 19.3, 18.3, 17.5, 8.5; LRMS (ESI) 555.3 [M+Na]<sup>+</sup>; HRMS (ESI) calcd for C<sub>32</sub>H<sub>52</sub>O<sub>6</sub> 555.3662 [M+Na]<sup>+</sup>, found 555.3680; [ $\alpha$ ]<sub>D</sub><sup>20</sup> +76.5 ( $c$  0.52, MeOH); (**77**) IR (CHCl<sub>3</sub>) 3428, 2962, 2928, 1690, 1635, 1380, 1243, 1145, 1064, 1000 cm<sup>-1</sup>; <sup>1</sup>H NMR (600 MHz, CD<sub>3</sub>OD)  $\delta$  7.20 (dd,  $J$  = 15.2, 10.8 Hz, 1H), 6.65 (ddd,  $J$  = 17.0, 10.6, 10.5 Hz, 1H), 6.38 (dd,  $J$  = 15.5, 5.4 Hz, 1H), 6.23 (dd,  $J$  = 14.4, 10.9 Hz, 1H), 5.95 (t,  $J$  = 11.0 Hz, 1H), 5.77 (d,  $J$  = 15.3 Hz, 1H), 5.40-5.39 (m, 2H), 5.23 (t,  $J$  = 10.5 Hz, 1H), 5.13 (d,  $J$  = 18.1 Hz, 1H), 5.12 (dd,  $J$  = 8.2, 1.5 Hz, 1H), 5.07 (d,  $J$  = 10.2 Hz, 1H), 4.66 (m, 1H), 3.90 (ddd,  $J$  = 7.6, 5.1, 2.5 Hz, 1H), 3.22 (dd,  $J$  = 9.8, 7.9 Hz, 1H), 3.04 (m, 1H), 2.95 (dd,  $J$  = 9.7, 2.1 Hz, 1H), 2.72 (m, 1H), 2.65 (m, 1H), 1.83 (m, 1H), 1.58 (m, 1H), 1.46 (m, 1H), 1.35-1.23 (m, 4H), 1.05 (d,  $J$  = 6.8 Hz, 3H), 1.04 (d,  $J$  = 6.9 Hz, 3H), 0.98 (d,  $J$  = 6.8 Hz, 3H), 0.97 (d,  $J$  = 7.0 Hz, 3H), 0.94 (m, 2H), 0.78 (m, 1H), 0.71 (d,  $J$  = 6.4 Hz, 3H), 0.68 (d,  $J$  = 6.5 Hz, 3H); <sup>13</sup>C NMR (150 MHz, CD<sub>3</sub>OD)  $\delta$  169.4, 147.5, 147.4, 135.9, 134.3, 133.7, 131.0, 128.9, 120.0, 118.0, 80.5, 78.5, 72.6, 72.0, 65.2, 43.6, 42.6, 42.1, 39.3, 36.3, 35.8, 35.6, 35.3, 31.4, 29.7, 19.3, 18.5, 17.4, 17.1, 14.8, 9.0; LRMS (ESI) 555.5 [M+Na]<sup>+</sup>; HRMS (ESI) calcd for C<sub>32</sub>H<sub>52</sub>O<sub>6</sub> 555.3662 [M+Na]<sup>+</sup>, found 555.3687; [ $\alpha$ ]<sub>D</sub><sup>20</sup> -17.3 ( $c$  0.15, MeOH).

<sup>i</sup> Phukan, P.; Sasmal, S.; Maier, M. E. *Eur. J. Org. Chem.* **2003**, 1733.

600.83 MHz 1H NMR spectrum of YSS479 in CDCl3 at 297K, d1=12 sec.,

```

Current Data Parameters
NAME      yss479
EXPNO    1
PROCNO   1

F2 - Acquisition Parameters
Date_    14.55
Time     spect
INSTRUM  5 mm TBI 1H/
PROBHD   Z9
PULPROG  65536
TD       CD2C12
SOLVENT  32
NS       0
DS       8992.806 Hz
SWH      0.137219 Hz
FIDRES   3.6438515 sec
AQ       10
RG       55.600 use
DW       6.00 use
DE       290.0 K
TE       12.00000000 sec
D1

===== CHANNEL f1 =====
NUC1     1H
P1       9.60 use
PL1      0.00 dB
SF01     600.8336050 MHz;

F2 - Processing parameters
SI       65536
SF       600.8300272 MHz;
WDW      EM
SSB      0
LB       0.10 Hz
GB       0
PC       1.00

1D NMR plot parameters
CX       20.00 cm
F1P      8.000 ppr
F1       4806.64 Hz
F2P      0.000 ppr
F2       0.00 Hz
PPMCM    0.40000 ppr
HZCM     240.33200 Hz,
  
```

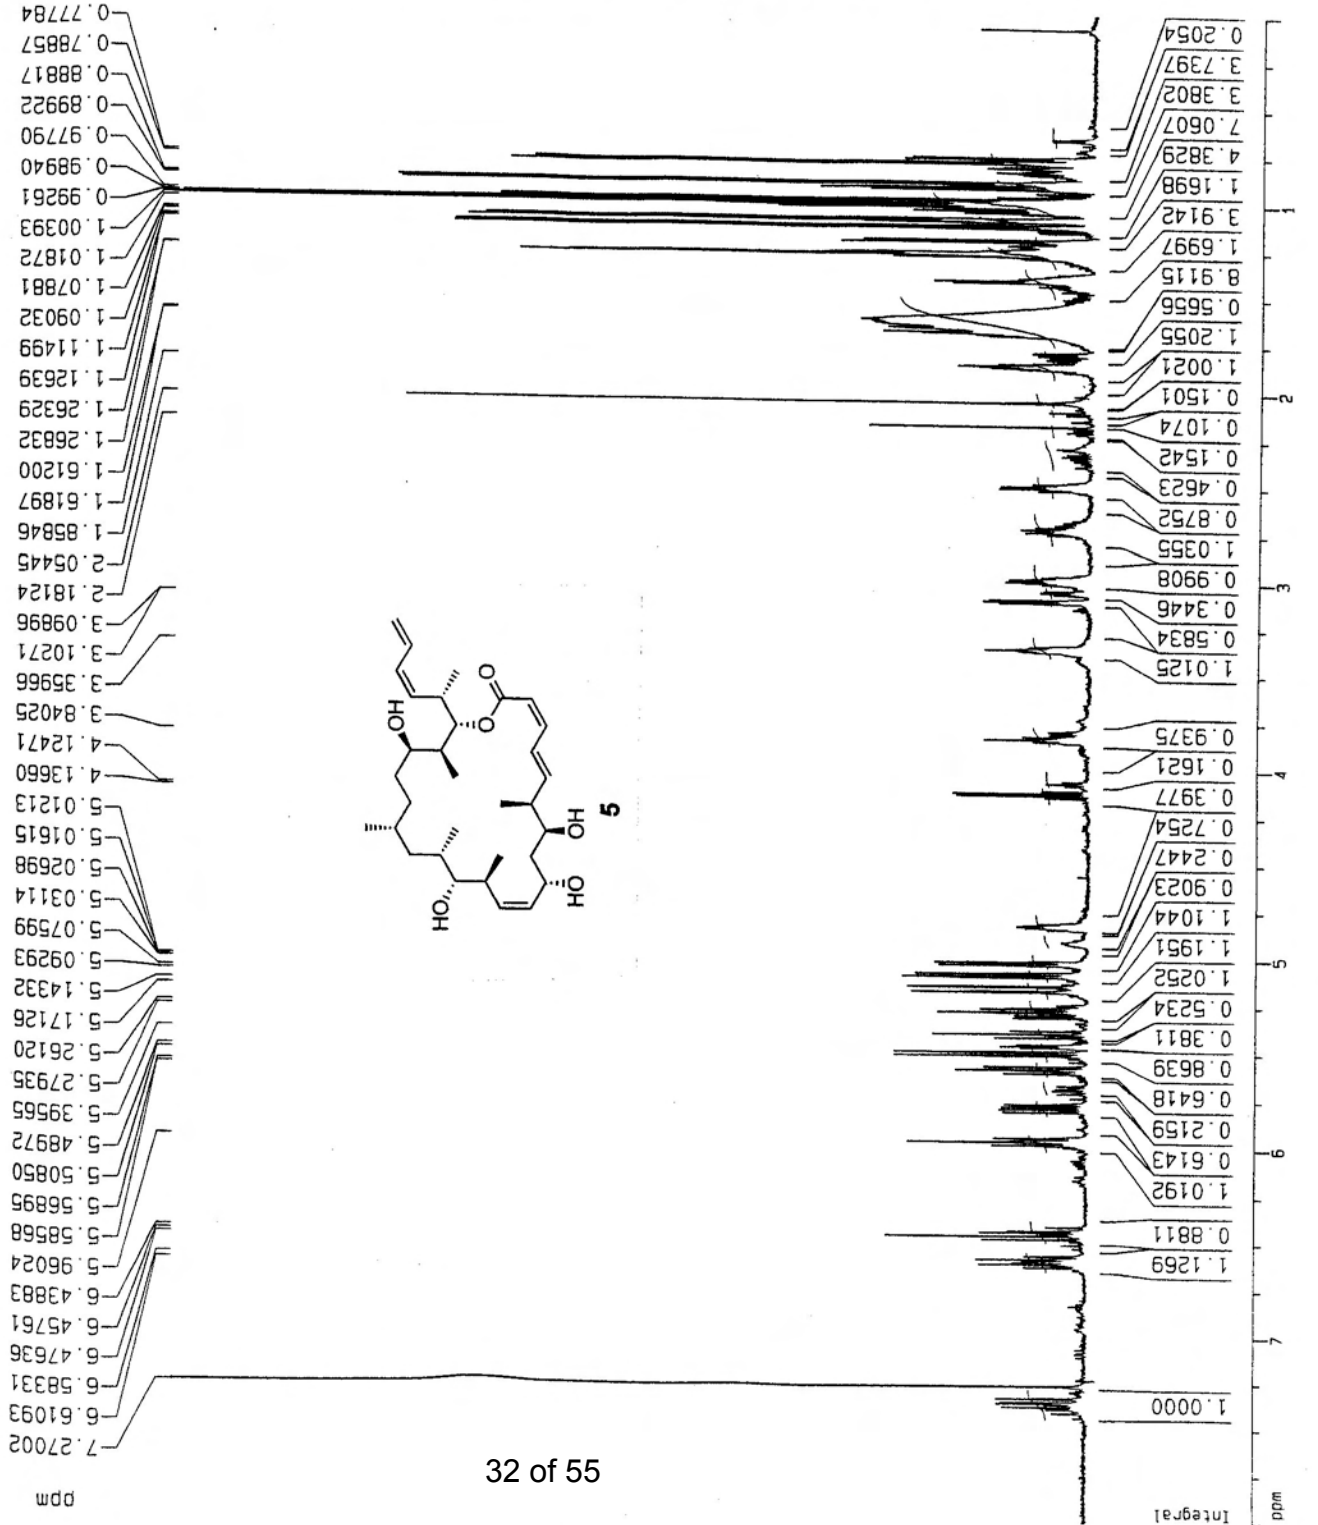



151.1 MHz 1H-decoupled 13C NR spectrum of YSS479  
 in CDC13 at 297K, d1=8 sec.

Current Data Parameters  
 NAME yss479  
 EXPNO 2  
 PROCNO 1

F2 - Acquisition Parameters

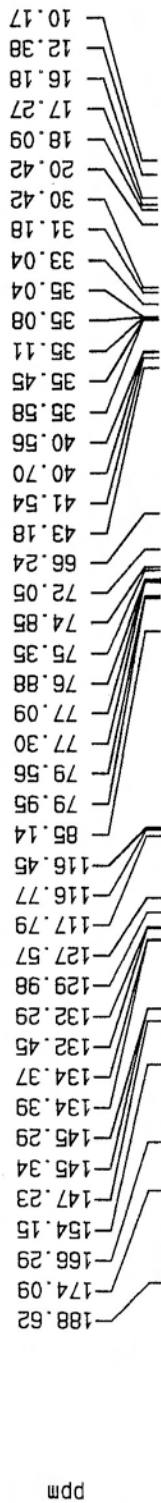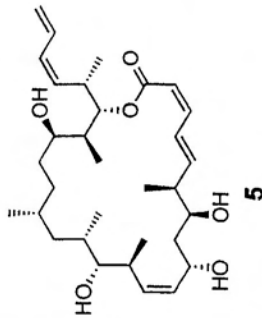

RG 32768  
 DW 13.200 usec  
 DE 6.00 usec  
 TE 290.0 K  
 D1 8.00000000 sec  
 D3 0.00100000 sec

==== CHANNEL f1 =====  
 NUC1 13C  
 P1 13.50 usec  
 PL1 0.00 dB  
 SF01 151.0963827 MHz

==== CHANNEL f2 =====  
 CPDPRG2 waltz16  
 NUC2 1H  
 PCPD2 100.00 usec  
 PL2 0.00 dB  
 PL12 12.00 dB  
 SF02 600.8336050 MHz

F2 - Processing parameters  
 SI 65536  
 SF 151.0788173 MHz  
 WDW no  
 SSB 0  
 LB 0.00 Hz  
 GB 0  
 PC 1.00

1D NMR plot parameters  
 CX 20.00 cm  
 F4P 225.000 ppm  
 F1 33992.73 Hz  
 F2P -15.000 ppm  
 F2 -2266.18 Hz  
 PPMCM 12.00000 ppm/cm  
 HZCM 1812.94580 Hz/cm

Current Data Parameters  
 NAME yss479  
 EXPNO 11  
 PROCNO 1

F2 - Acquisition Parameters

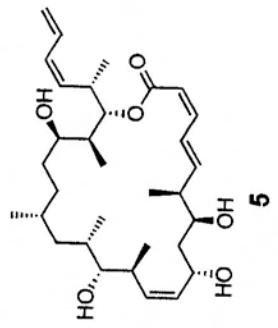

DI 1 0000000 del  
 INO 0.00013320 sec  
 \*\*\*\*\* CHANNEL f1 \*\*\*\*\*  
 NUC1 1H  
 P0 8.20 usec  
 P1 8.20 usec  
 PL1 0.00 dB  
 SFO1 600.8336050 MHz

F1 - Acquisition Parameters  
 ND0 1  
 TD 256  
 SFO1 600.8336 MHz  
 FIDRES 29.326200 Hz  
 SW 12.495 ppm

F2 - Processing Parameters  
 SI 512  
 SF 600.8300210 MHz  
 MDW SINE  
 SSB 0  
 LB 0.00 Hz  
 GB 0  
 PC 1.00

F1 - Processing Parameters  
 SI 512  
 HC2 OF  
 SF 600.8300220 MHz  
 MDW SINE  
 SSB 0  
 LB 0.00 Hz  
 GB 0

20 MHz plot parameters  
 CX2 15.00 cm  
 CX1 15.00 cm  
 F2P10 7.503 ppm  
 F2L0 4507.75 Hz  
 F2PH1 0.547 ppm  
 F2H1 328.77 Hz  
 F1P10 7.623 ppm  
 F1L0 4580.05 Hz  
 F1PH1 0.570 ppm  
 F1H1 342.42 Hz  
 F2P1M4 0.46369 ppm/cm  
 F2N2M 278.59884 Hz/cm  
 F1P1M4 0.47020 ppm/cm  
 F1N2M 282.50906 Hz/cm

455  
 600.83 MHz / 600.83 MHz hh2d cosy spectrum  
 of yss479 in CDCl3 at 297K.

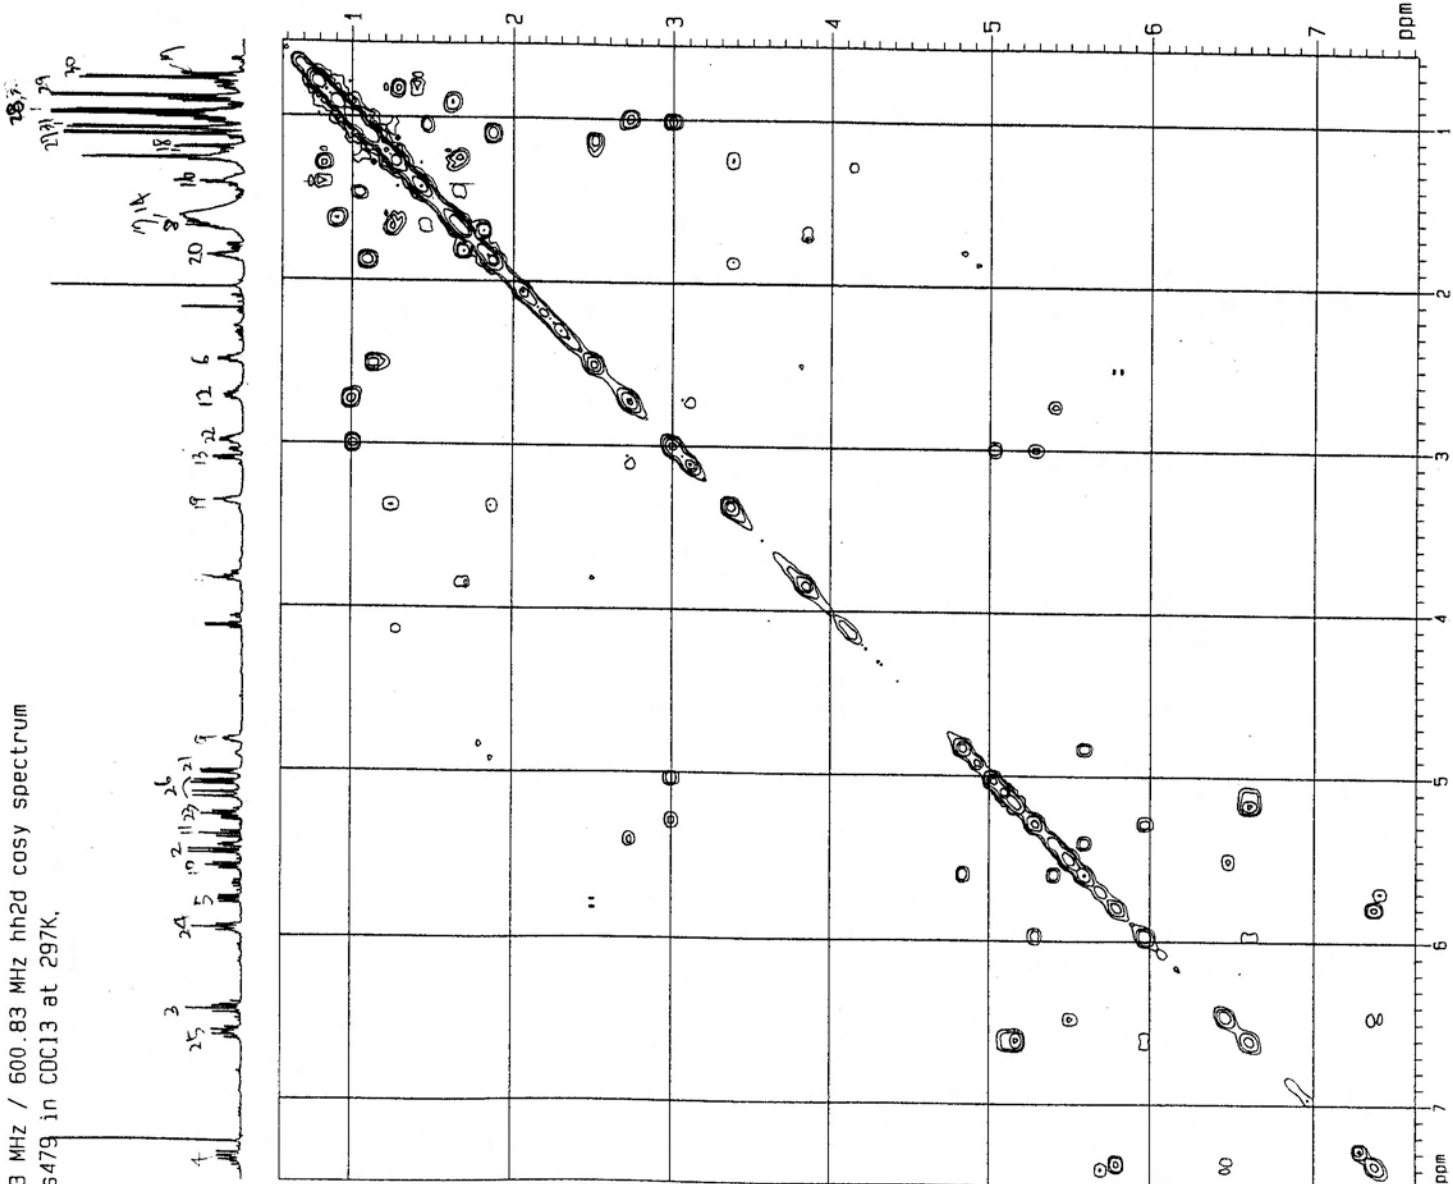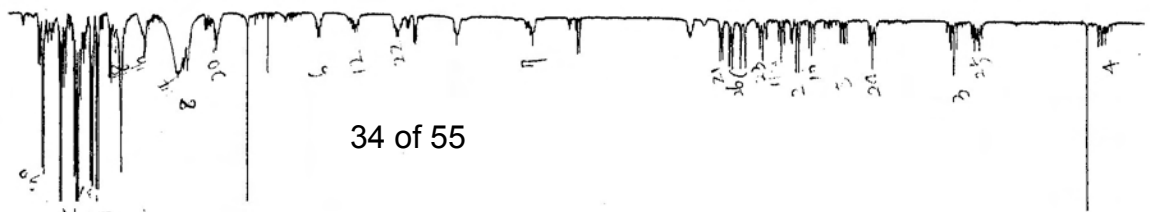

600.83 MHz / 151.1 MHz hc2d, HMQC NMR spectrum of YSS479 at 297K

Current Data Parameters  
 NAME 155479  
 EXPNO 12  
 PROCNO 1

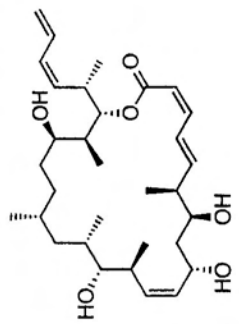

```

***** CHANNEL f1 **
NUC1 1H
P1 9.60 US
P2 19.20 US
PL1 0.00 dB
SF01 500.8342058 MHz

***** CHANNEL f2 **
CPDPRG2 GRCP
NUC2 13C
P3 13.50 US
PCPD2 100.00 US
PL2 0.00 dB
PL12 12.00 dB
SF02 151.0953827 MHz

***** GRADIENT CHANNEL *****
P16 1000.00 US

F1 - Acquisition parameters
NO 2
ID 256
SF01 151.0954 MHz
FIDRES 147.40555 Hz
SFO1 249.749 GHz

F2 - Processing parameters
SI 1024
SF 600.8300216 MHz
WDW SINE
SSB 0
LB 0.00 Hz
GB 0
PC 1.00

F1 - Processing parameters
SI 1024
DC
SF 151.0766222 MHz
WDW SINE
SSB 0
LB 0.00 Hz
GB 0

2D NMR plot parameters
CX2 18.00 cm
CX1 15.00 cm
F2PL0 7.563 GHz
F2L0 4544.31 Hz
F2PH1 0.621 GHz
F2H1 3172.84 Hz
F1PL0 150.838 GHz
F1L0 22780.37 Hz
F1PH1 5.436 GHz
F1H1 972.33 Hz
F2PRNG 0.38671 GHz
F2PCN 231.74820 Hz
F1PRNG 9.95678 GHz
F1PCN 149.40263 Hz
  
```

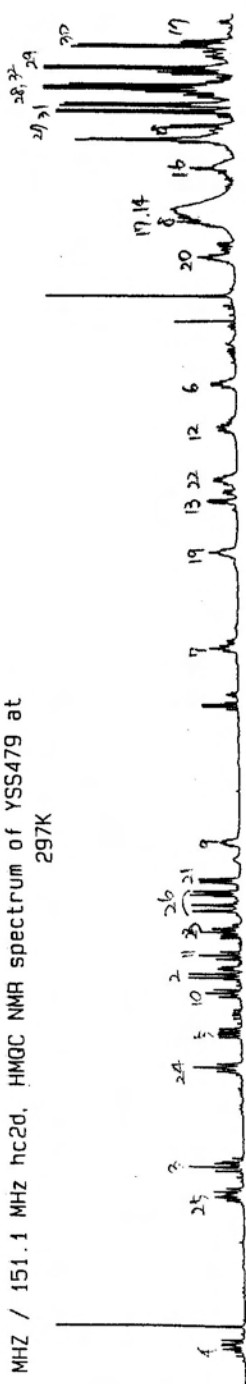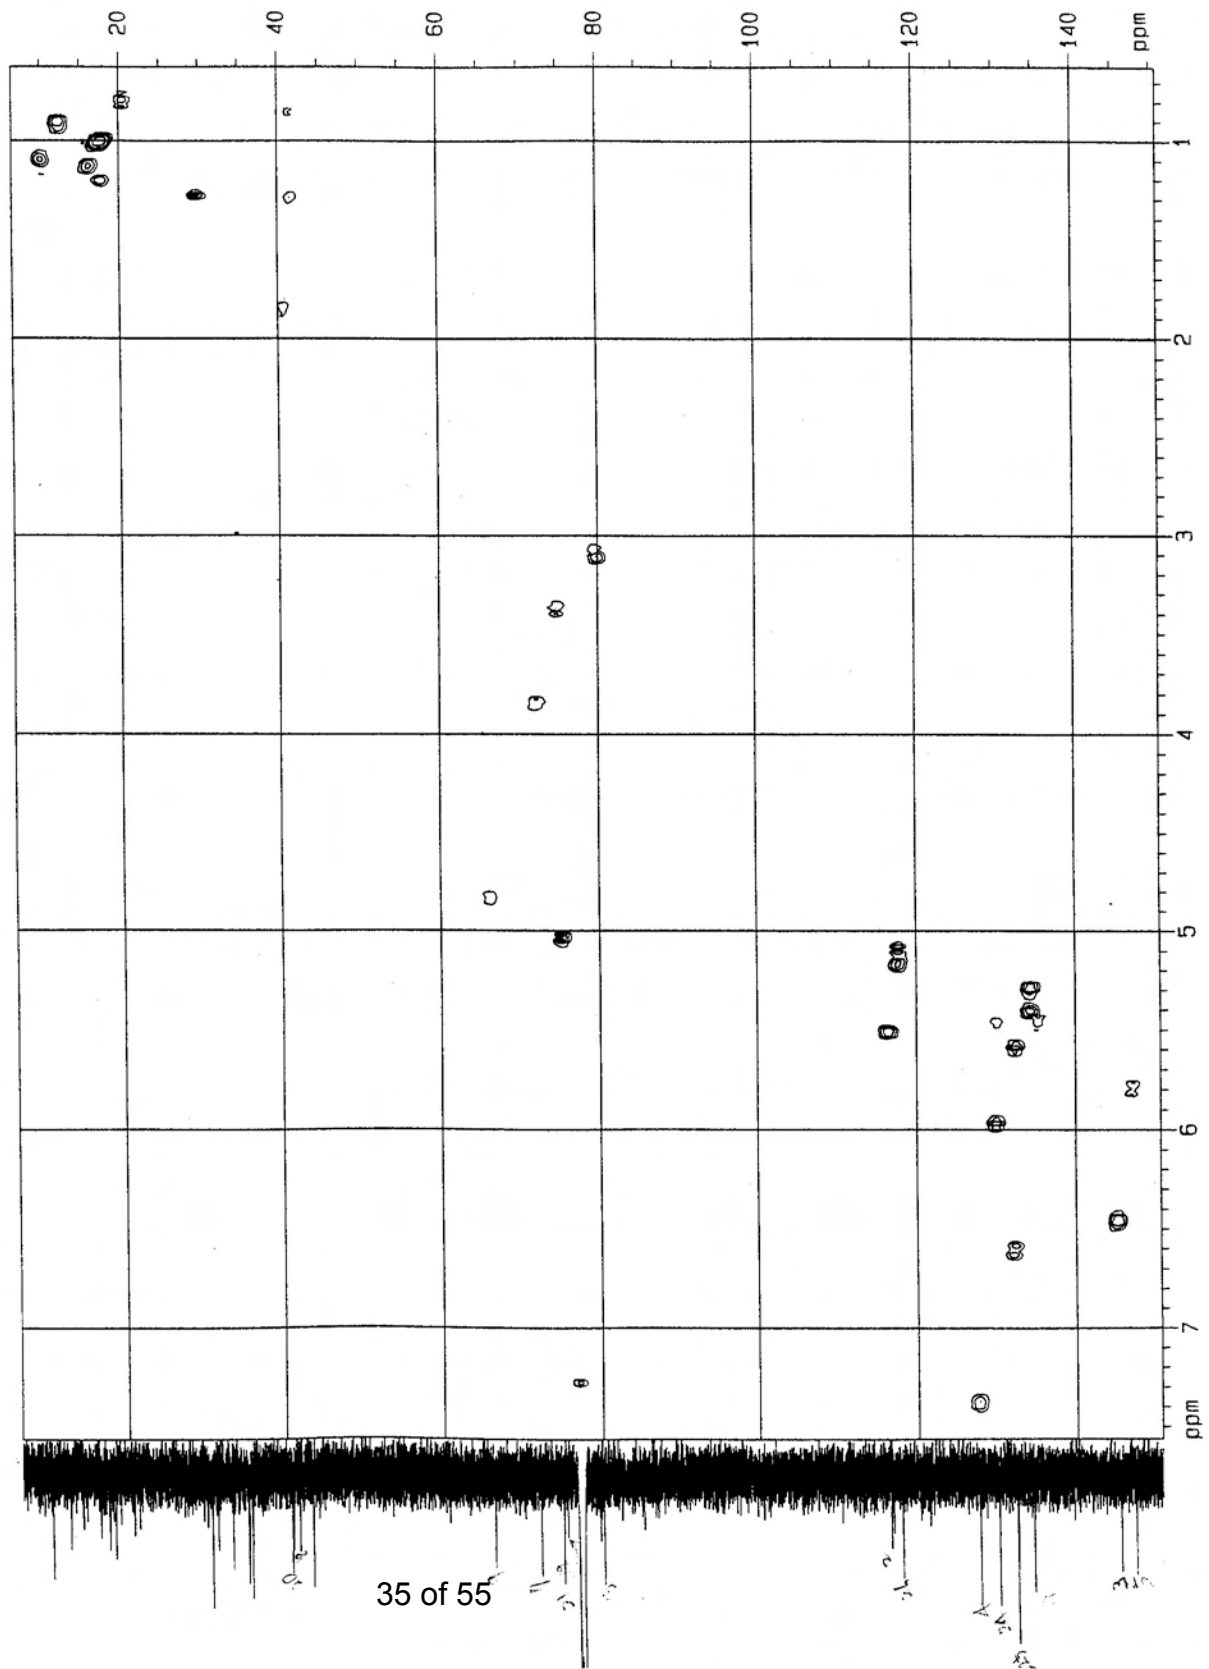

600.83 MHz / 151.1 MHz HMBC spectrum of YSS479 at 297K

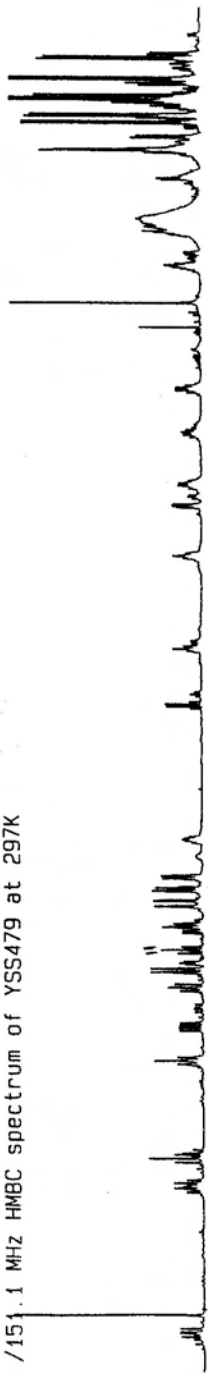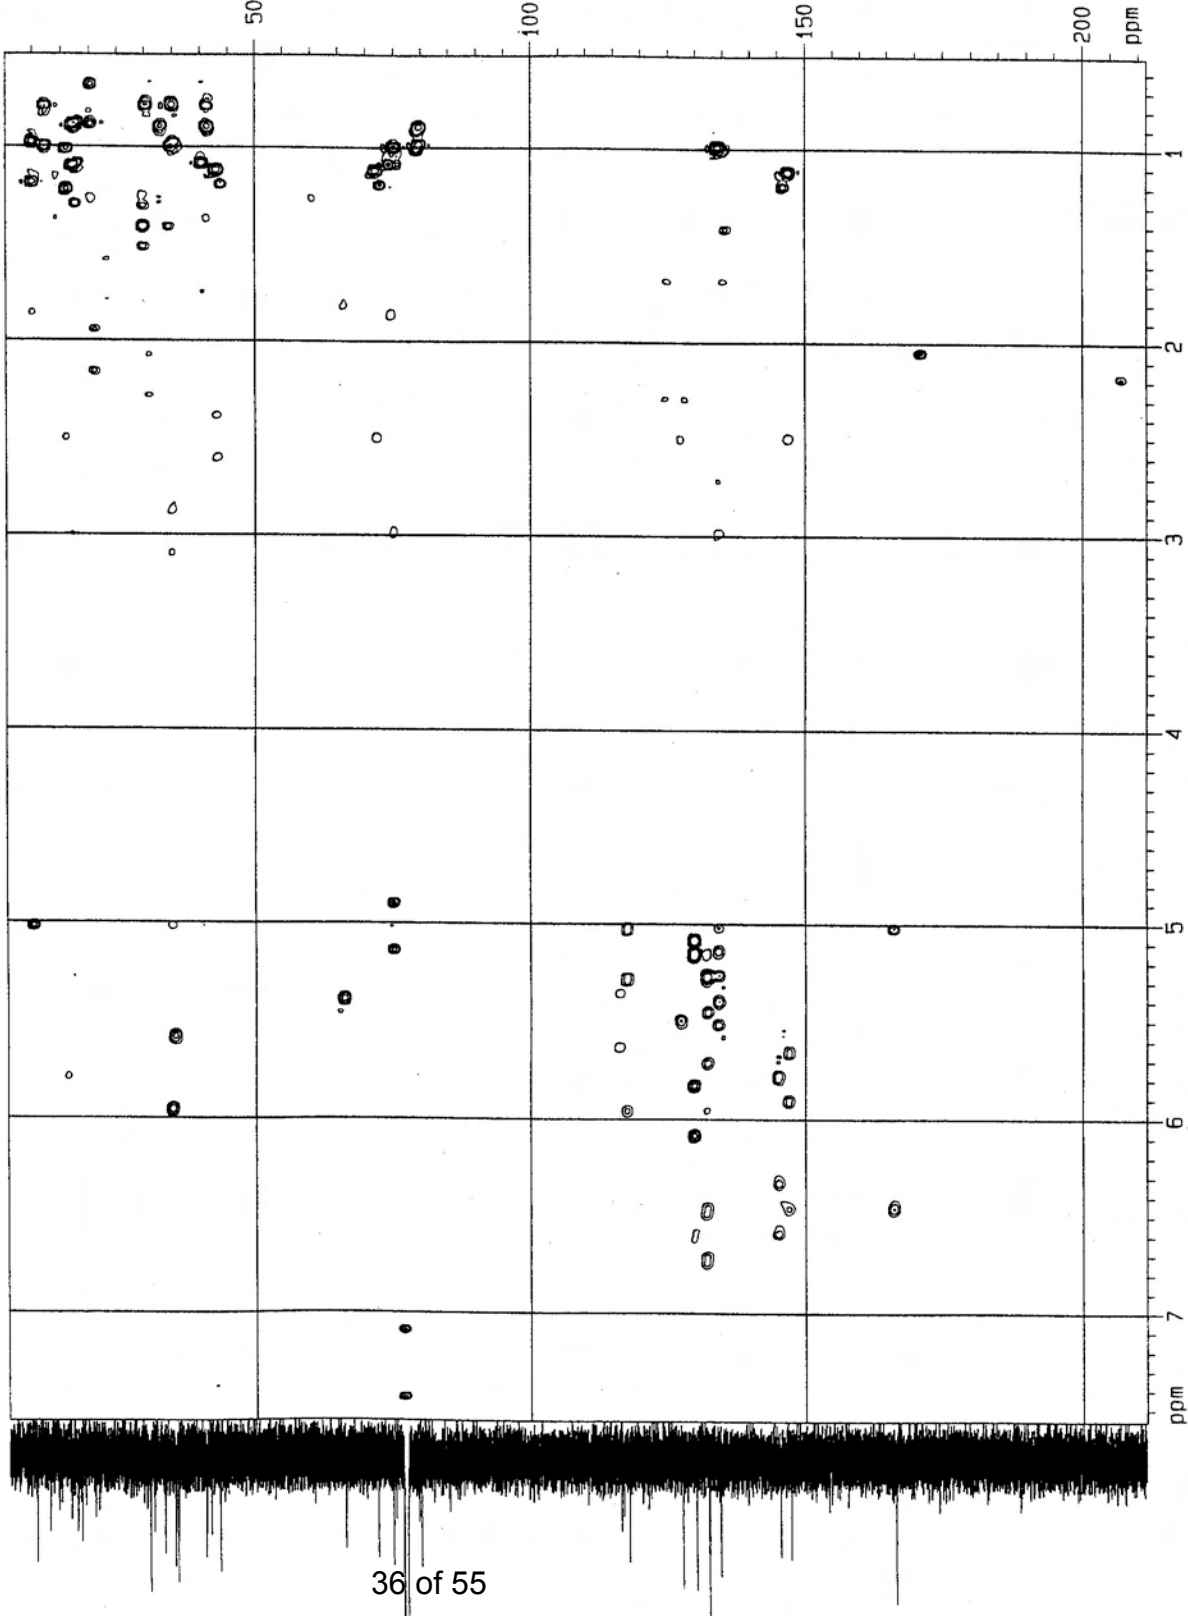

Current Data Parameters  
 NAME YSS479  
 EXPNO 1122  
 PROCNO 1

F2 - Acquisition Parameter

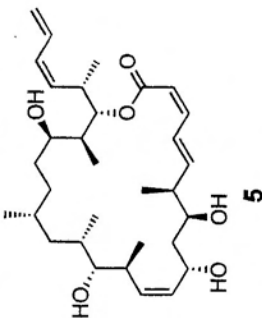

NUC1 13C  
 P1 9.60 usec  
 P2 19.20 usec  
 PL1 0.00 dB  
 SF01 600.8336050 MHz

\*\*\*\*\* CHANNEL 11 \*\*\*\*\*

NUC2 13C  
 P3 13.50 usec  
 PL2 0.00 dB  
 SF02 151.0953927 MHz

\*\*\*\*\* GRADIENT CHANNEL \*\*\*\*\*

P16 1000.00 usec

F1 - Acquisition parameter

NU0 2  
 TD 256  
 SF01 151.0954 MHz  
 FIDRES 147.405655 Hz  
 SM 249.749 ppm

F2 - Processing parameter

SI 1024  
 SF 600.8300280 MHz  
 MDW 0  
 SSB 0  
 LB 0.00 Hz  
 GB 0  
 PC 1.00

F1 - Processing parameter

SI 2048  
 MC2 0  
 SF 151.0788437 MHz  
 MDW 0  
 SSB 0  
 LB 0.00 Hz  
 GB 0

2D NMR plot parameters

CX2 18.00 cm  
 CX1 15.00 cm  
 F2PL0 7.561 ppm  
 F2L0 4542.96 Hz  
 F2PHI 0.516 ppm  
 F2HI 310.02 Hz  
 F1PL0 211.431 ppm  
 F1L0 31942.80 Hz  
 F1PHI 5.317 ppm  
 F1HI 803.34 Hz  
 F2PHCN 0.39140 ppm/cm  
 F2HZCN 235.16344 Hz/cm  
 F1PHCN 13.74053 ppm/cm  
 F1HZCN 2075.96411 Hz/cm

yss675-1 cd30d 298K 600MHz 1H delay 12sec 7/16/04 ft1

Current Data Parameters  
 NAME yss675-1-ft1  
 EXPNO 1  
 PROCNO 1

F2 - Acquisition Parameters  
 Date\_ 20040716  
 Time 10.40  
 INSTRUM spect  
 PROBHD 5 mm TBI 1H/  
 PULPROG zg  
 TD 65536  
 SOLVENT CD2Cl2  
 NS 16  
 DS 0  
 SWH 8992.806 Hz  
 FIDRES 0.137219 Hz  
 AQ 3.6438515 sec  
 RG 10  
 DW 55.600 usec  
 DE 6.00 usec  
 TE 290.0 K  
 D1 12.0000000 sec

===== CHANNEL f1 =====  
 NUC1 1H  
 P1 9.00 usec  
 PL1 0.00 dB  
 SF01 600.8336050 MHz

F2 - Processing parameters  
 SI 65536  
 SF 600.8300180 MHz  
 WDW EM  
 SSB 0  
 LB 0.10 Hz  
 GB 0  
 PC 1.00

1D NMR plot parameters  
 CX 20.00 cm  
 F1P 8.000 ppm  
 F1 4806.64 Hz  
 F2P 0.000 ppm  
 F2 0.00 Hz  
 PPMCM 0.40000 ppm/cm  
 HZCM 240.33200 Hz/cm

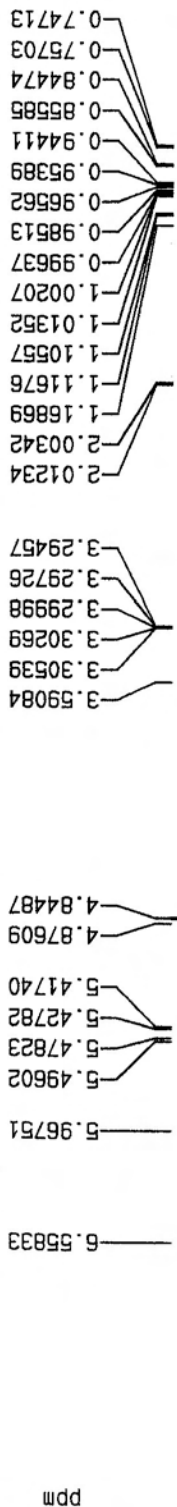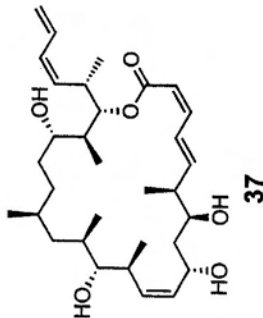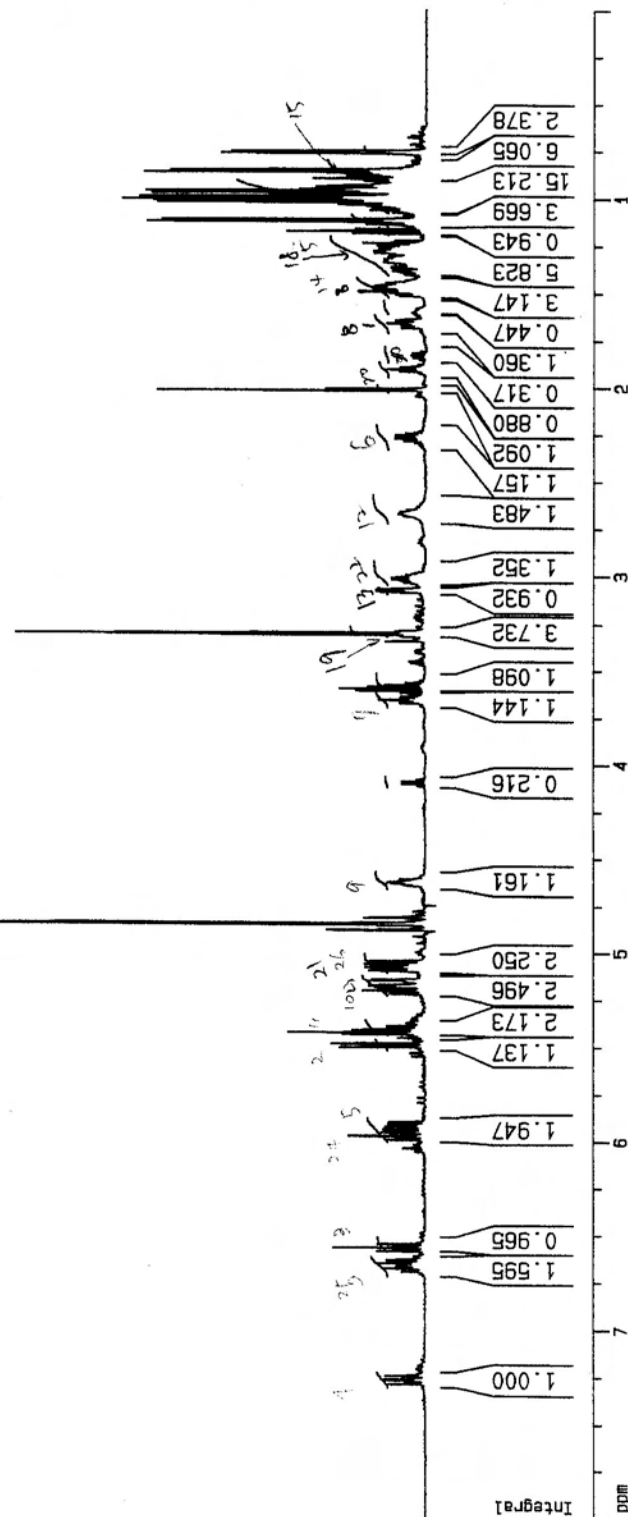

yss675-1 cd30d 298K 151MHz13C 1H decp delay 8sec 7/15/04

Current Data Parameters  
 NAME yss675-1-ft1  
 EXPNO 2  
 PROCNO 1

F2 - Acquisition Parameters

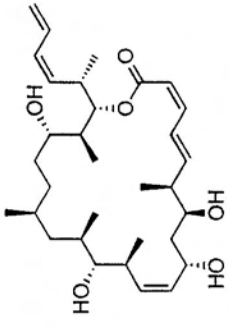

AG 0.8651252 sec  
 RG 32768  
 DW 13.200 usec  
 DE 6.00 usec  
 TE 290.0 K  
 D1 12.00000000 sec  
 D3 0.00100000 sec

==== CHANNEL f1 =====  
 NUC1 13C  
 P1 13.50 usec  
 PL1 0.00 dB  
 SF01 151.0953827 MHz

==== CHANNEL f2 =====  
 CPDPRG2 waltz16  
 NUC2 1H  
 PCPD2 100.00 usec  
 PL2 0.00 dB  
 PL12 12.00 dB  
 SF02 600.8336050 MHz

F2 - Processing parameters  
 SI 65536  
 SF 151.0786142 MHz  
 WDW EM  
 SSB 0  
 LB 1.00 Hz  
 GB 0  
 PC 1.00

1D NMR plot parameters  
 CX 20.00 cm  
 F4P 176.293 ppm  
 F1 26634.11 Hz  
 F2P 5.179 ppm  
 F2 782.37 Hz  
 PPMCM 8.55572 ppm/cm  
 HZCM 1292.58691 Hz/cm

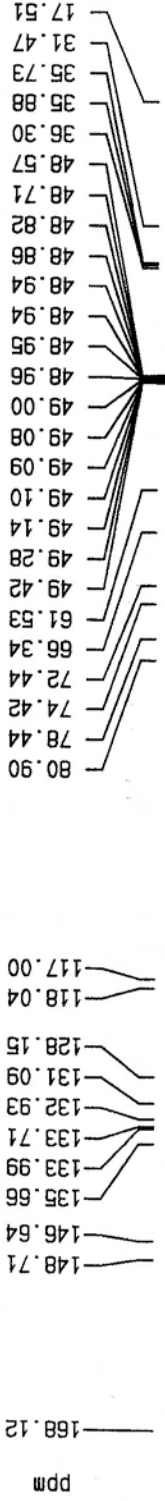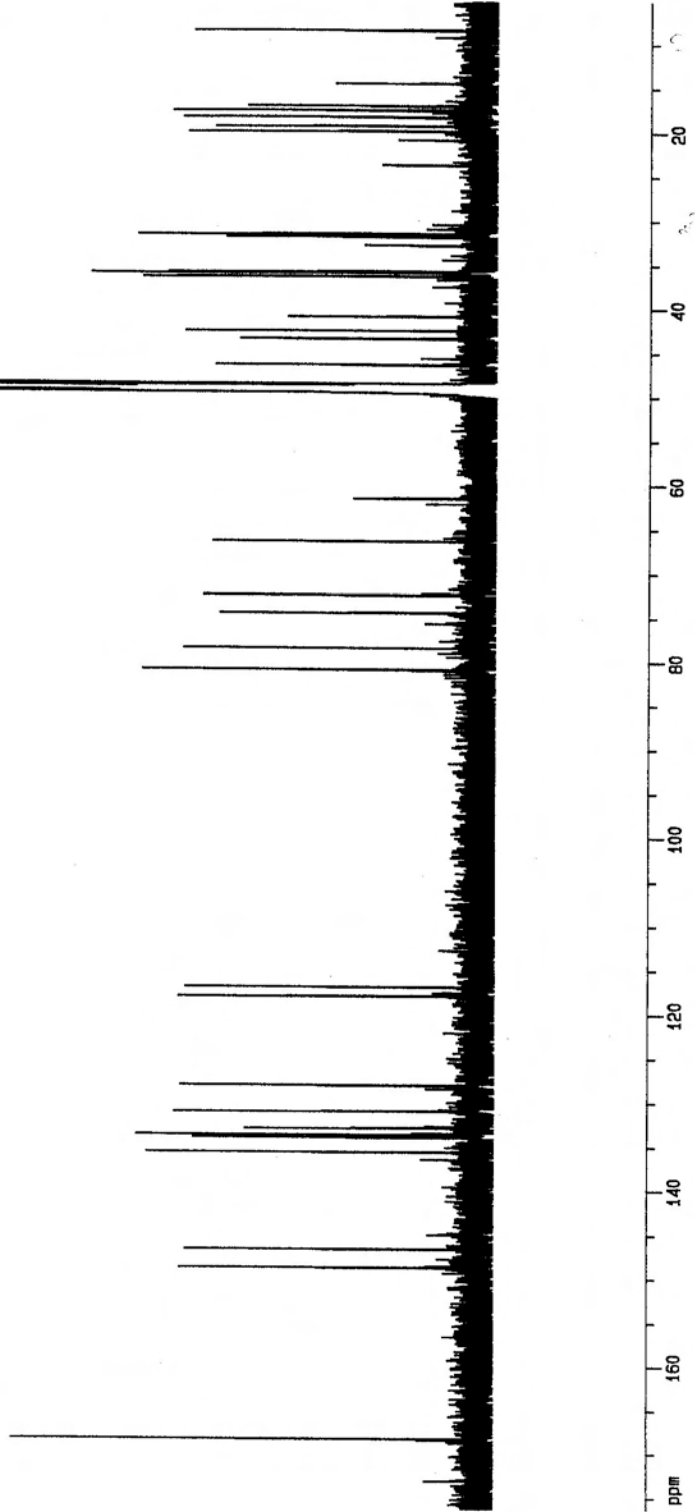

yss665-2 cd3od 298K 600MHz 1H delay 12sec 7/11/04 ft1

Current Data Parameters  
 NAME yss665-2-ft1  
 EXPNO 1  
 PROCNO 1

F2 - Acquisition Parameters  
 Date\_ 20040711  
 Time 10.12  
 INSTRUM spect  
 PROBHD 5 mm TBI 1H/  
 PULPROG zg  
 TD 65536  
 SOLVENT CDC13  
 NS 16  
 DS 0  
 SWH 8992.806 Hz  
 FIDRES 0.137219 Hz  
 AQ 3.6438515 sec  
 RG 10  
 DW 55.600 usec  
 DE 6.00 usec  
 TE 290.0 K  
 D1 12.00000000 sec

==== CHANNEL f1 =====  
 NUC1 1H  
 P1 9.00 usec  
 PL1 0.00 dB  
 SF01 600.8336050 MHz

F2 - Processing parameters  
 SI 65536  
 SF 600.8300180 MHz  
 WDW EM  
 SSB 0  
 LB 0.40 Hz  
 GB 0  
 PC 1.00

1D NMR plot parameters  
 CX 20.00 cm  
 F1P 8.000 ppm  
 F1 4806.64 Hz  
 F2P 0.000 ppm  
 F2 0.00 Hz  
 PPMCM 0.40000 ppm/cm  
 HZCM 240.33200 Hz/cm

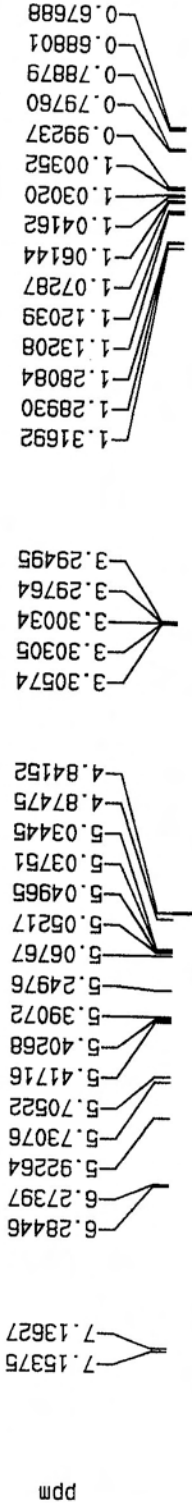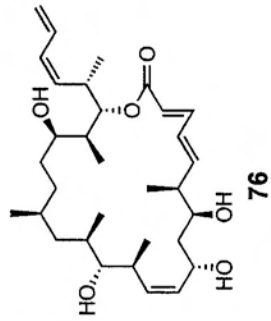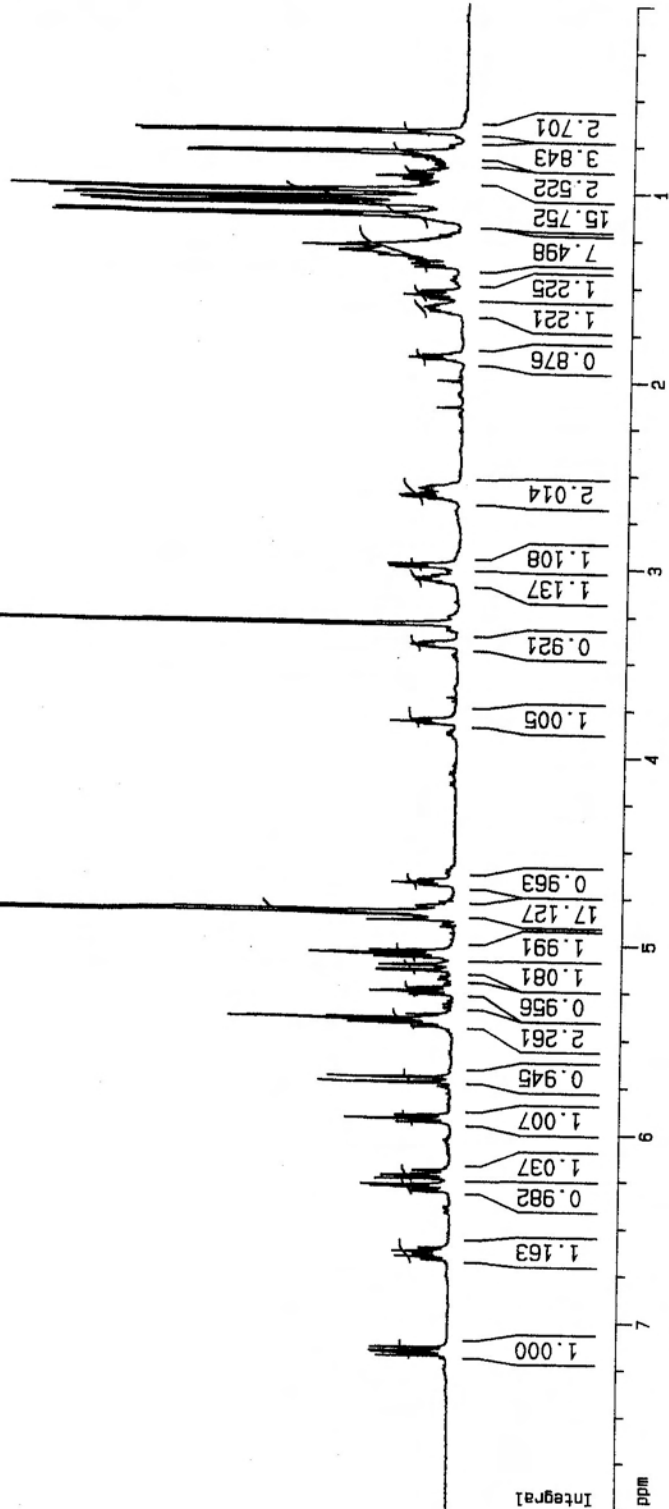

yss665-2 cd30d 298K 151MHz 13C 1H decp delay 8sec 7/13/04 ft1

Current Data Parameters  
 NAME yss665-2-ft1  
 EXPNO 2  
 PROCNO 1

F2 - Acquisition Parameters

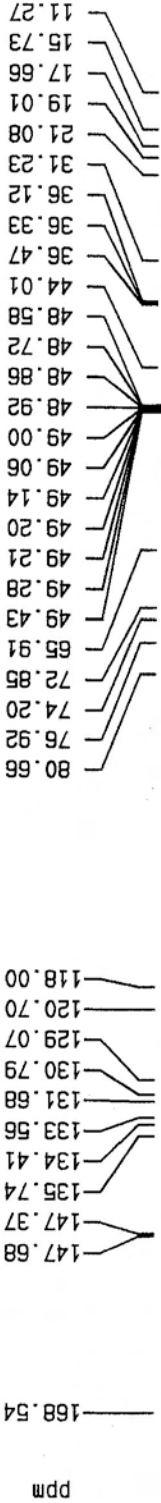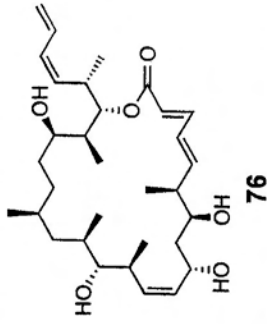

RG 0.8651252 sec  
 RG 32768  
 DW 13.200 usec  
 DE 6.00 usec  
 TE 290.0 K  
 D1 8.0000000 sec  
 D3 0.00100000 sec

==== CHANNEL f1 =====  
 NUC1 13C  
 P1 13.50 usec  
 PL1 0.00 dB  
 SF01 151.0953827 MHz

==== CHANNEL f2 =====  
 CPDPRG2 waltz16  
 NUC2 1H  
 PCPD2 100.00 usec  
 PL2 0.00 dB  
 PL12 12.00 dB  
 SF02 500.8336050 MHz

F2 - Processing parameters  
 SI 65536  
 SF 151.0786124 MHz  
 WDW EM  
 SSB 0  
 LB 1.00 Hz  
 GB 0  
 PC 1.00

1D NMR plot parameters  
 CX 20.00 cm  
 F4P 180.000 ppm  
 F1 27194.15 Hz  
 F2P 0.000 ppm  
 F2 0.00 Hz  
 PPMCM 9.00000 ppm/cm  
 HZCM 1359.70752 Hz/cm



Current Data Parameters  
 NAME YSS665-2-ft1  
 EXPNO 11  
 PROCNO 1

yss665-2 cd30d 298K 600MHz hh2d cosy 7/11/04 ft1

F2 - Acquisition Parameters

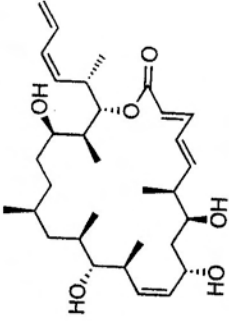

D1 1.00000000 sec  
 INO 0.00013320 sec

\*\*\*\*\* CHANNEL f1 \*\*\*\*\*  
 NUC1 H  
 P0 8.20 usec  
 P1 9.50 usec  
 PL1 0.00 dB  
 SF01 500.8336050 MHz

F1 - Acquisition parameters

NUC 1  
 TD 256  
 SF01 600.83336 MHz  
 FIDRES 29.326200 Hz  
 SW 12.495 ppm

F2 - Processing parameters

SI 512  
 SF 500.8300091 MHz  
 SINE  
 MDW 0  
 SSB 0  
 LB 0.00 Hz  
 GB 0  
 PC 1.00

F1 - Processing parameters

SI 512  
 MC2 0  
 SF 600.8300094 MHz  
 SINE  
 MDW 0  
 SSB 0  
 LB 0.00 Hz  
 GB 0

2D NMR plot parameters

CX2 15.00 cm  
 CX1 15.00 cm  
 F2PLO 7.327 ppm  
 F2LO 4402.33 Hz  
 F2PHI 0.494 ppm  
 F2H1 286.56 Hz  
 F1PLO 7.375 ppm  
 F1LO 4431.39 Hz  
 F1PHI 0.469 ppm  
 F1H1 281.73 Hz  
 F2PPMCM 0.45556 ppm/cm  
 F2HZCM 273.71121 Hz/cm  
 F1PPMCM 0.46044 ppm/cm  
 F1HZCM 276.64383 Hz/cm

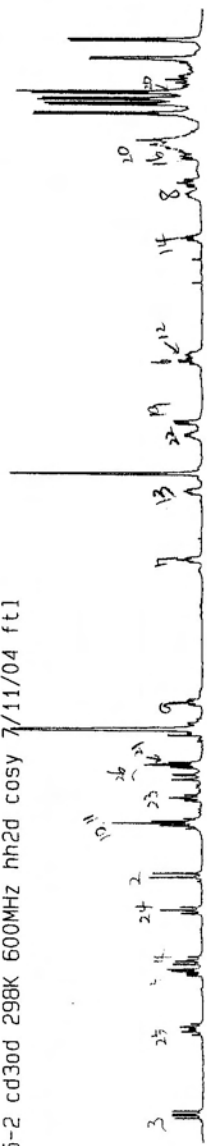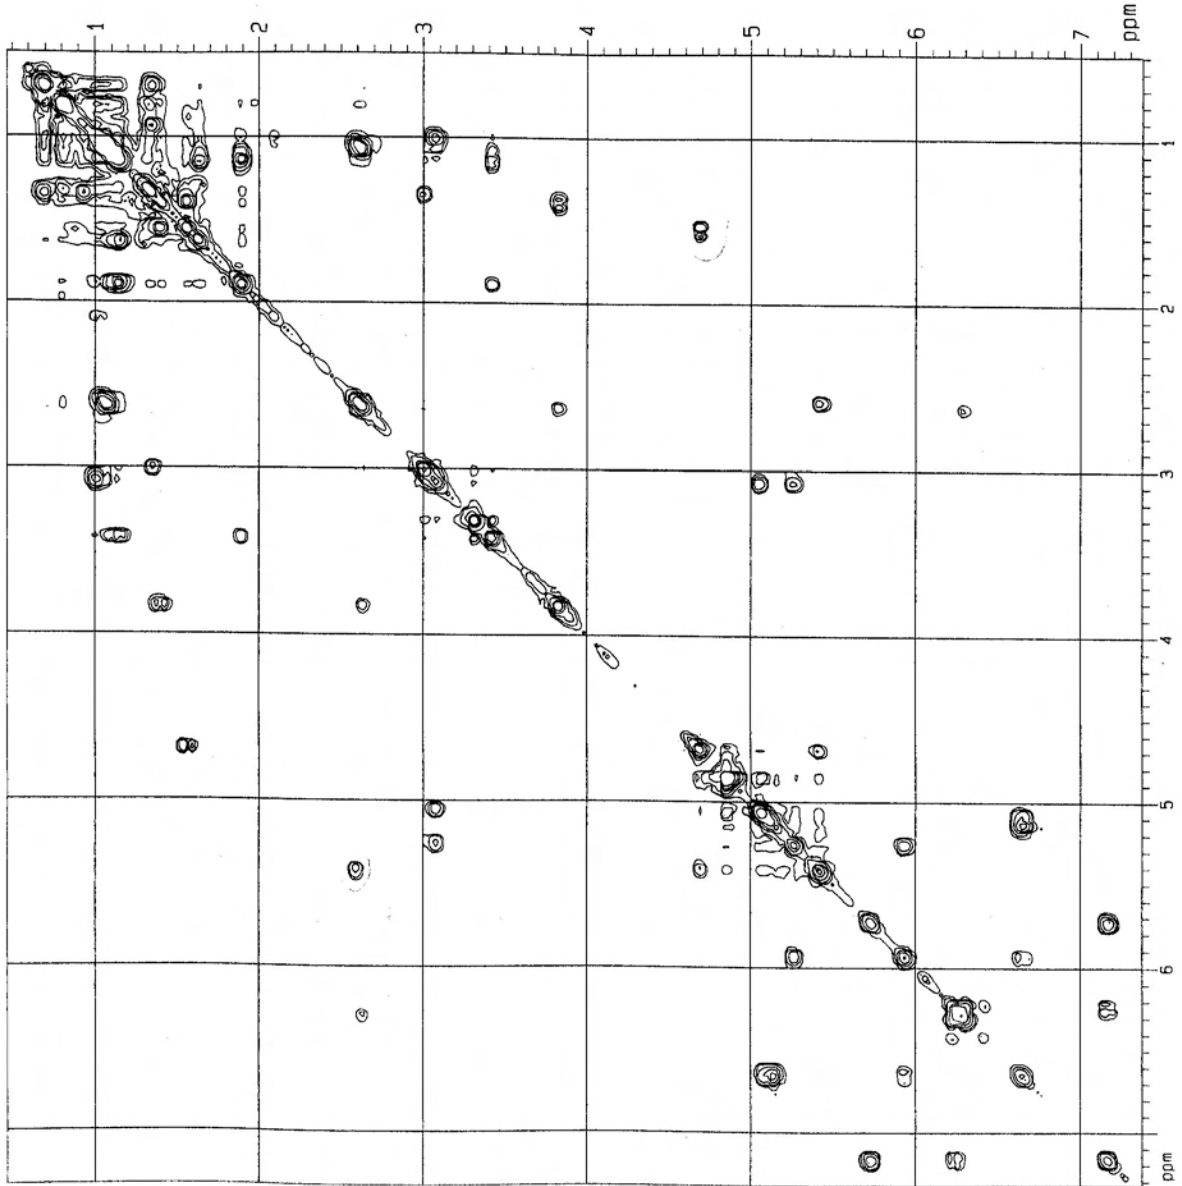

Current Data Parameters  
 NAME YSS665-2-111  
 EXPNO 12  
 PROCNO 1

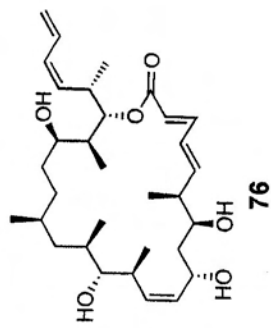

```

00 0.0000300 SE
01 1.5000000 SE
02 0.00344828 SE
012 0.0000000 SE
013 0.0000300 SE
016 0.0005000 SE
020 0.00242528 SE
END 0.00001655 SE

***** CHANNEL f1 **
NUC1 1H
P1 9.60 US
P2 19.20 US
PL1 0.00 DB
SF01 600.8325635 MHz

***** CHANNEL f2 **
CPDPRG2 gexp
NUC2 13C
P3 13.50 US
PCPD2 100.00 US
PL2 0.00 DB
PL12 12.00 DB
SF02 151.0935697 MHz

***** GRADIENT CHANNELS *****
P16 1000.00 US

F1 - Acquisition parameters
NO 2
TD 256
SF01 151.09356 MHz
FIDRES 118.013596 Hz
SFO1 151.0935697 MHz
SF02 151.0935697 MHz

F2 - Processing parameters
SI 1024
SF 600.8300219 MHz
WDW SINE
SSB 0
LB 0.00 Hz
GB 0
PC 1.00

F3 - Processing parameters
SI 1024
MC2 DF
SF 151.0785655 MHz
WDW SINE
SSB 0
LB 0.00 Hz
GB 0

20 NMR print parameters
CX2 18.00 CH
CX1 15.00 CH
F2PLO 7.320 PP
F2LO 439.798 Hz
F2PHI 0.696 PP
F1LO 393.86 Hz
F1PHI 153.975 PP
F1LO 23562.93 Hz
F1PHI 7.320 PP
F1H1 1105.91 Hz
F2PHI0M 0.37024 PP
F2LOM 222.45093 Hz
F1PHI0M 9.77726 Hz
F1H20M 1477.13452 Hz
  
```

YSS665-2 cd30d 298K 600MHz/151MHz hc2d (HMOC) 7/11/04 ft1

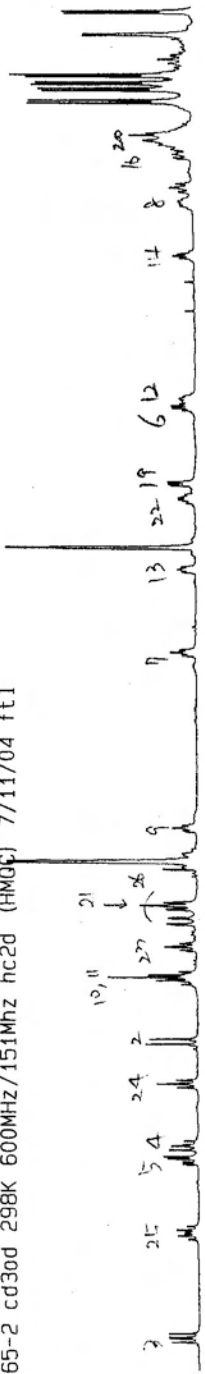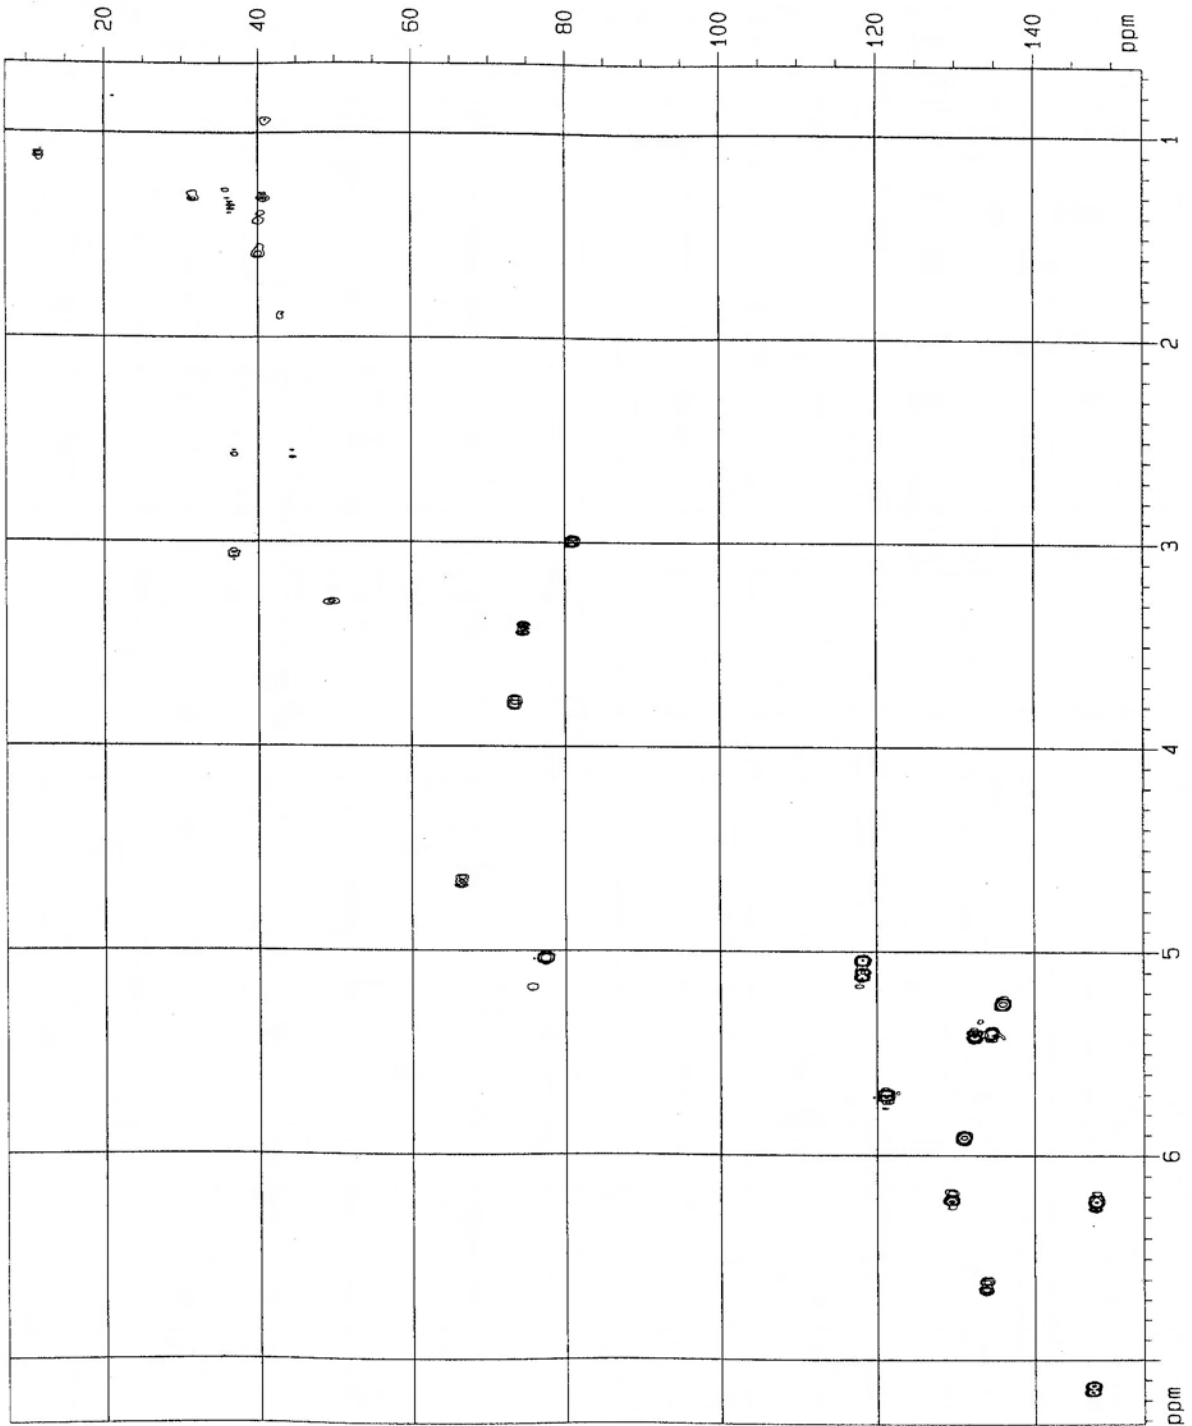

Current Data Parameters  
 YSS665-2-ft1  
 1122  
 1

YSS665-2 cd30d 298K 600MHz/151MHz hc2d coloc (HMBC) 7/12/04 ft1

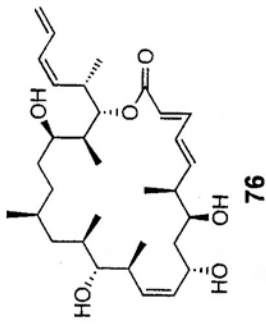

00 0.00000300 sec  
 01 1.00000000 sec  
 05 0.05000000 sec  
 013 0.00000300 sec  
 016 0.00050000 sec  
 INO 0.00001655 sec

\*\*\*\*\* CHANNEL f1 \*\*\*\*\*  
 NUCL1 1H  
 P1 9.60 usec  
 P2 19.20 usec  
 PL1 0.00 dB  
 SF01 600.8325835 MHz

\*\*\*\*\* CHANNEL f2 \*\*\*\*\*  
 NUCL2 13C  
 P3 13.50 usec  
 PL2 0.00 dB  
 SF02 151.0538719 MHz  
 P16 1000.00 usec  
 \*\*\*\*\* GRADIENT CHANNEL \*\*\*\*\*

F1 - Acquisition parameter  
 X00 2  
 10 256  
 SF01 151.0539 MHz  
 FIDRES 118.013585 Hz  
 SN 189.952 ppm

F2 - Processing parameter  
 SI 1024  
 SF 600.8300253 MHz  
 SINE SINE  
 SSB 0  
 LB 0.00 Hz  
 GB 0  
 PC 1.00

F1 - Processing parameter  
 SI 2048  
 MC2 OF  
 SF 151.0785975 MHz  
 SINE SINE  
 SSB 0  
 LB 0.00 Hz  
 GB 0

2D NMR plot parameters  
 CX2 18.00 cm  
 CX1 15.00 cm  
 F2PLO 7.367 ppm  
 F2LO 4426.12 Hz  
 F2PHI 0.457 ppm  
 F1PLO 173.748 ppm  
 F1LO 26249.64 Hz  
 F1PHI 5.487 ppm  
 FIHI 960.01 Hz  
 F2PHCKM 0.38386 ppm/cm  
 F2U2CKM 230.63571 Hz/cm  
 F1PHCKM 11.15077 ppm/cm  
 F1U2CKM 1684.64203 Hz/cm

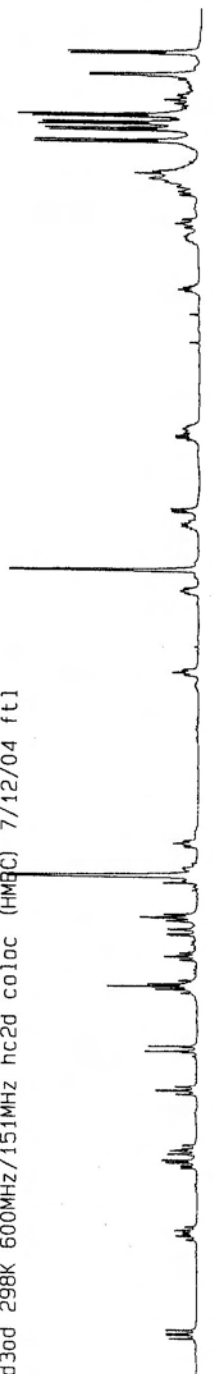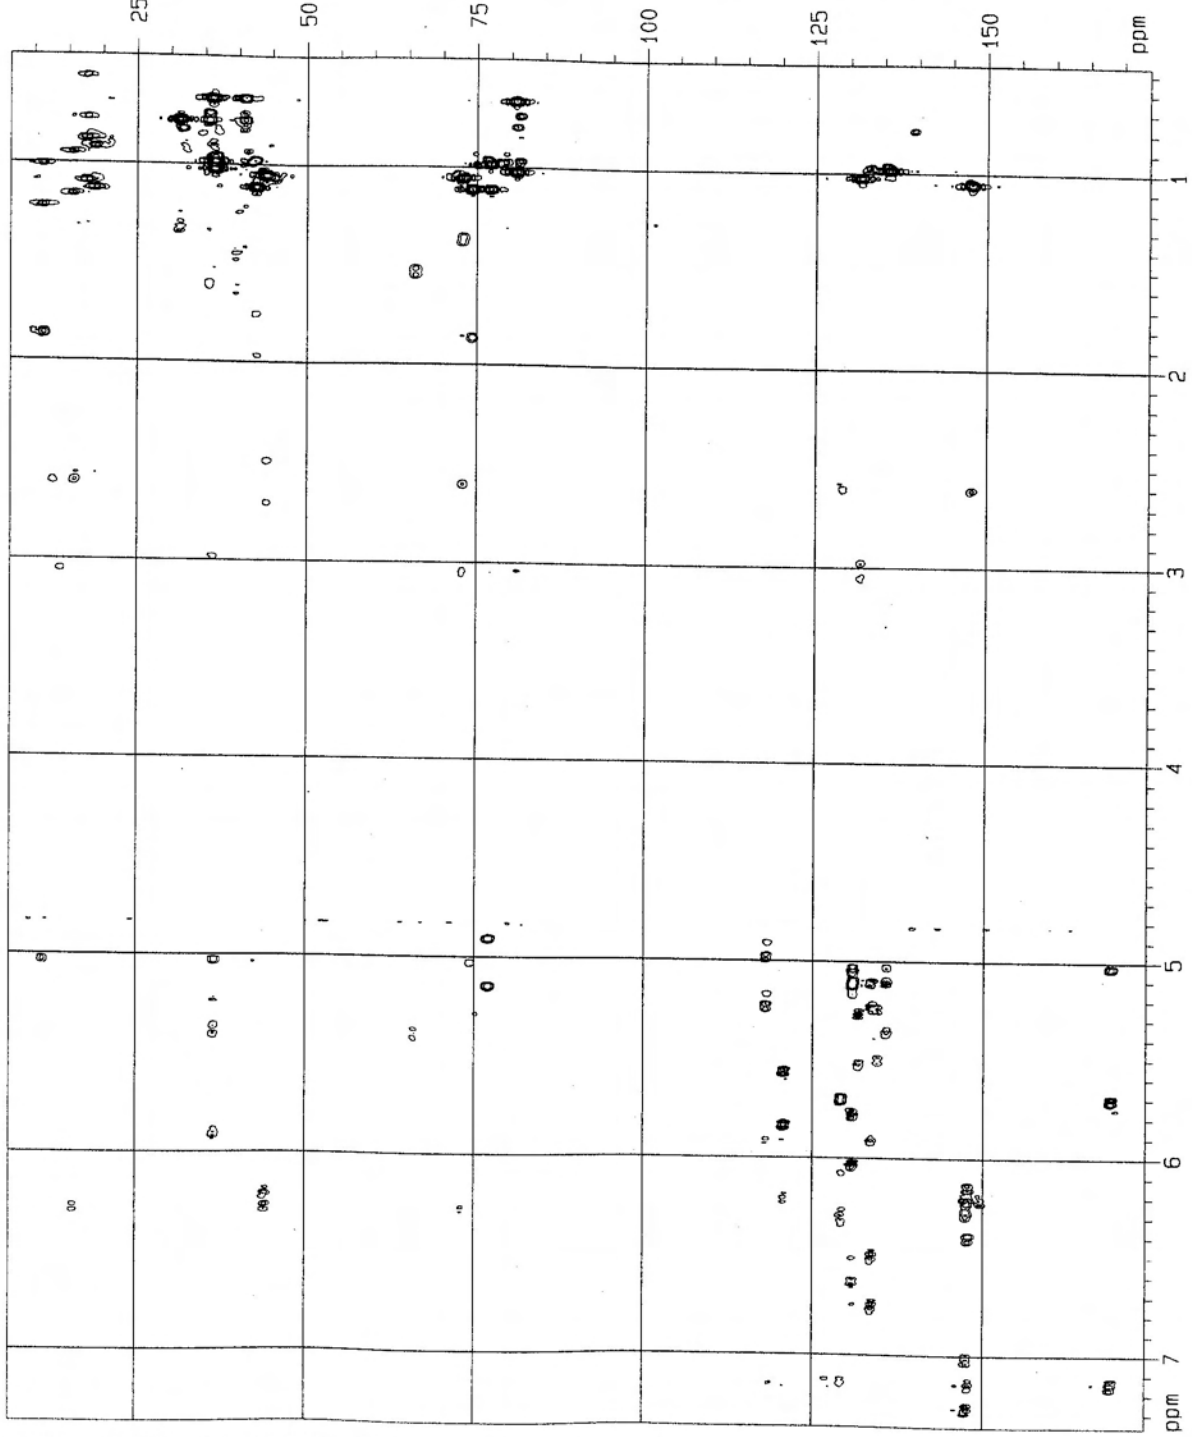

Current Data Parameters  
 NAME yss675-2-ft1  
 EXPNO 1  
 PROCNO 1

F2 - Acquisition Parameters  
 Date\_ 20040717  
 Time 11.18  
 INSTRUM spect  
 PROBHD 5 mm TBI 4H/  
 PULPROG zg  
 TD 65536  
 SOLVENT CDC13  
 NS 16  
 DS 0  
 SWH 8992.806 Hz  
 FIDRES 0.137219 Hz  
 AQ 3.6438515 sec  
 RG 10  
 DW 55.600 usec  
 DE 6.00 usec  
 TE 290.0 K  
 D1 12.00000000 sec

===== CHANNEL f1 =====  
 NUC1 1H  
 P1 9.00 usec  
 PL1 0.00 dB  
 SF01 600.8336050 MHz

F2 - Processing parameters  
 SI 65536  
 SF 600.8300181 MHz  
 WDW EM  
 SSB 0  
 LB 0.40 Hz  
 GB 0  
 PC 1.00

1D NMR plot parameters  
 CX 20.00 cm  
 F1P 8.000 ppm  
 F1 4806.64 Hz  
 F2P 0.000 ppm  
 F2 0.00 Hz  
 PPMCM 0.40000 ppm/cm  
 HZCM 240.33200 Hz/cm

7.20662  
7.19929  
7.18117  
5.94617  
5.78642  
5.76098  
5.39972  
5.39131  
5.38588  
5.22695  
5.15349  
5.13962  
5.13712  
5.12339  
5.08252  
5.06557  
4.83817  
4.82664  
4.82408  
4.82066  
4.81249  
3.30543  
3.30272  
3.30001  
3.29729  
3.29459  
2.95669  
2.94316  
2.93954  
1.58091  
1.46801  
1.28021  
1.27488  
1.05565  
1.05004  
1.04430  
1.03849  
1.00066  
0.99179  
0.98052  
0.97179  
0.96011  
0.71187  
0.70126  
0.68463  
0.67386

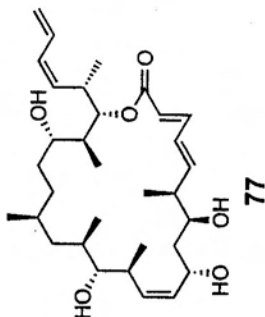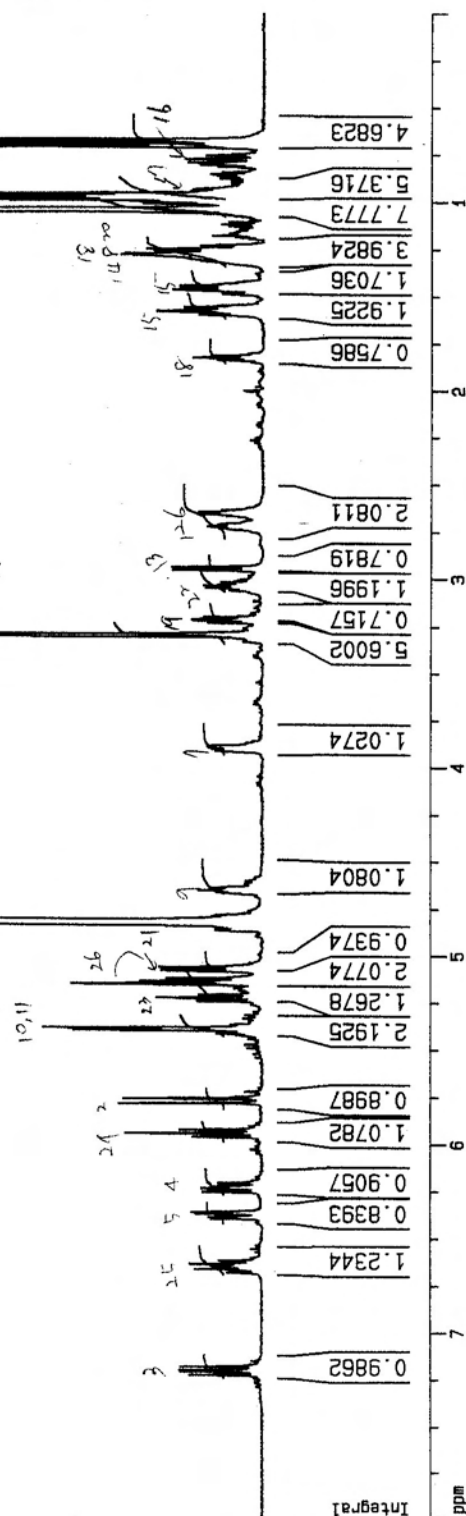

yss675-2 cd30d 298K 151MHz 13C 1H decp delay 8sec 7/19/04 ft.1

Current Data Parameters  
 NAME yss675-2-ft.1  
 EXPNO 2  
 PROCNO 1

F2 - Acquisition Parameters

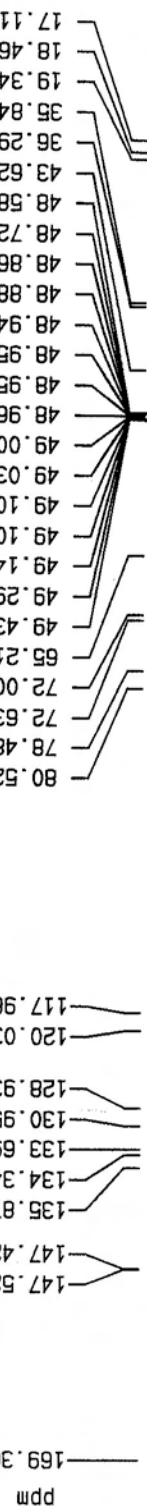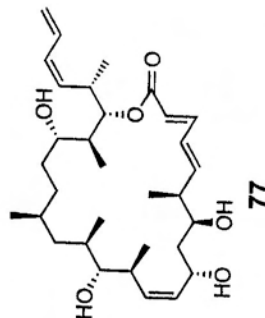

AQ 0.8651252 sec  
 RG 32768  
 DW 13.200 usec  
 DE 6.00 usec  
 TE 290.0 K  
 D1 8.00000000 sec  
 D3 0.00100000 sec

==== CHANNEL f1 =====  
 NUC1 13C  
 P1 13.50 usec  
 PL1 0.00 dB  
 SF01 151.0953827 MHz

==== CHANNEL f2 =====  
 CPDPRG2 waltz16  
 NUC2 1H  
 PCPD2 100.00 usec  
 PL2 0.00 dB  
 PL12 12.00 dB  
 SF02 600.8336050 MHz

F2 - Processing parameters  
 SI 65536  
 SF 151.0786118 MHz  
 MDW EM  
 SSB 0  
 LB 1.00 Hz  
 GB 0  
 PC 1.00

1D NMR plot parameters  
 CX 20.00 cm  
 F1P 175.742 ppm  
 F1 26550.83 Hz  
 F2P 1.511 ppm  
 F2 228.29 Hz  
 PPMCM 8.71454 ppm/cm  
 HZCM 1316.12720 Hz/cm

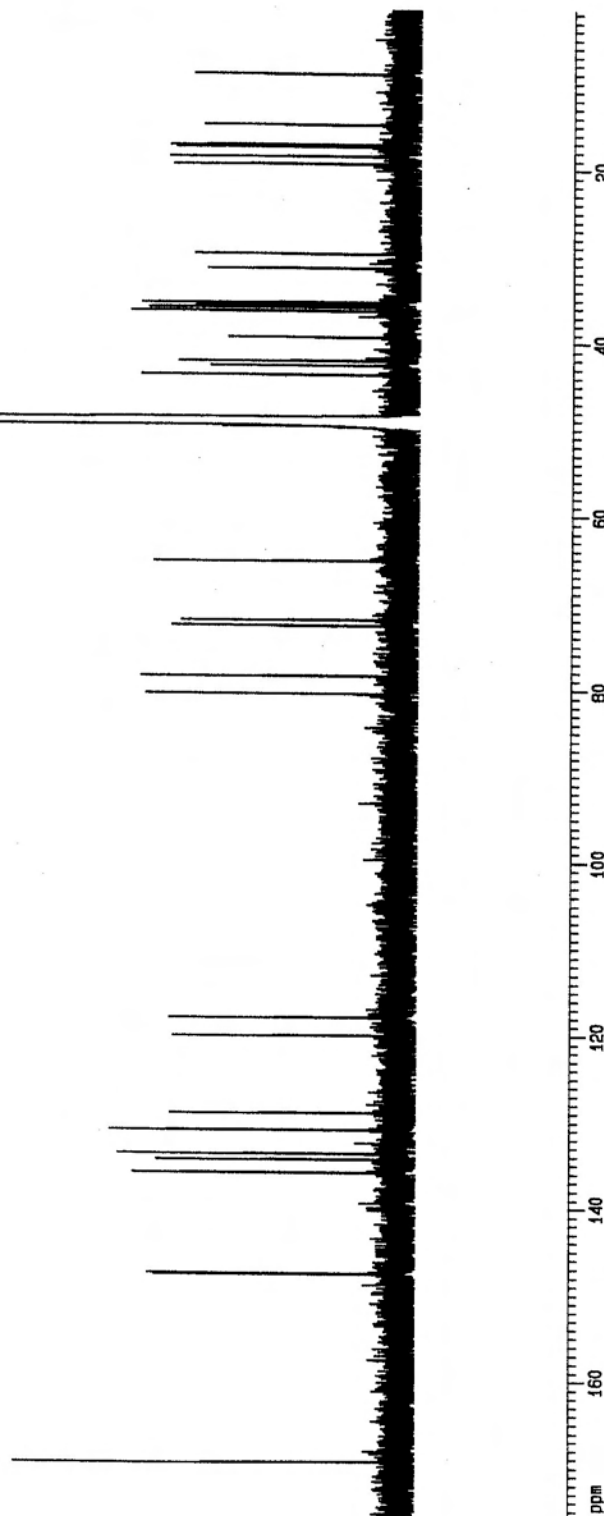

yss629 cdc13 298K 600MHz 1H delay 12sec 5/27/04 ft1

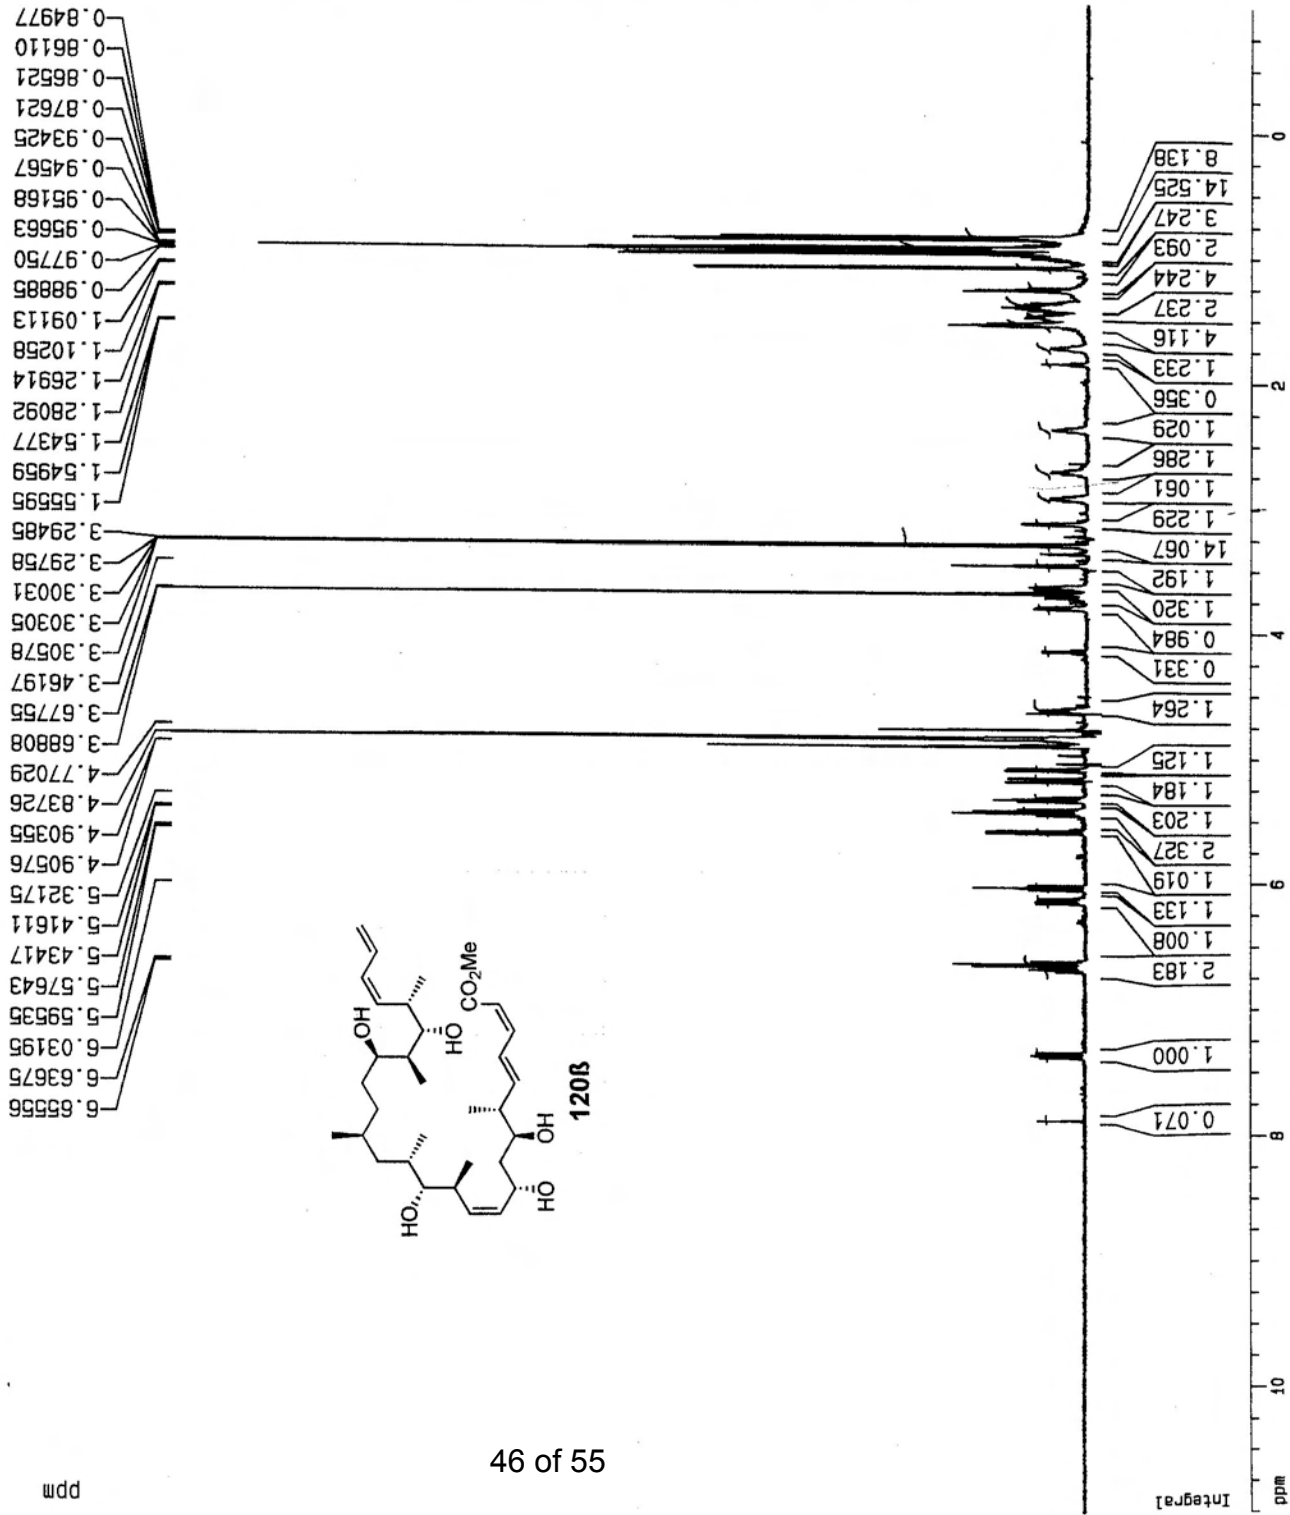

Current Data Parameters  
 NAME yss629-ft1  
 EXPNO 1  
 PROCNO 1

F2 - Acquisition Parameters  
 Date\_ 20040527  
 Time 19.45  
 INSTRUM spect  
 PROBHD 5 mm TBI 1H/  
 PULPROG zg  
 TD 65536  
 SOLVENT MeOH  
 NS 8  
 DS 0  
 SWH 8992.806 Hz  
 FIDRES 0.137219 Hz  
 AQ 3.6438515 sec  
 RG 40  
 DW 55.600 usec  
 DE 6.00 usec  
 TE 290.0 K  
 D1 12.0000000 sec

===== CHANNEL f1 =====  
 NUC1 1H  
 P1 9.00 usec  
 PL1 0.00 dB  
 SFO1 600.8336050 MHz

F2 - Processing parameters  
 SI 65536  
 SF 600.8300180 MHz  
 WDW EM  
 SSB 0  
 LB 0.10 Hz  
 GB 0  
 PC 1.00

1D NMR plot parameters  
 CX 20.00 cm  
 F1P 11.000 ppm  
 F1 6609.13 Hz  
 F2P -1.000 ppm  
 F2 -600.83 Hz  
 PPMCM 0.60000 ppm/cm  
 HZCM 360.49802 Hz/cm

yss629 cd30d 298K 151MHz 13C 1H decp delay 8sec 6/3/04 ft1

Current Data Parameters  
 NAME yss629-ft1  
 EXPNO 2  
 PROCNO 1

F2 - Acquisition Parameters

Date\_ 20040604  
 Time 11.30  
 INSTRUM spect  
 PROBHD 5 mm TBI 1H/  
 PULPROG c13wance  
 TD 65536  
 SOLVENT CDC13  
 NS 8399  
 DS 0  
 SWH 37878.789 Hz  
 FIDRES 0.577984 Hz  
 AQ 0.8651252 sec  
 RG 32768  
 DW 13.200 usec  
 DE 6.00 usec  
 TE 290.0 K  
 D1 8.0000000 sec  
 D3 0.0010000 sec

=====  
 CHANNEL f1  
 NUC1 13C  
 P1 13.50 usec  
 PL1 0.00 dB  
 SF01 151.0953827 MHz

=====  
 CHANNEL f2  
 CPDPRG2 waltz16  
 NUC2 1H  
 PCPD2 100.00 usec  
 PL2 0.00 dB  
 PL12 12.00 dB  
 SF02 500.8336050 MHz

F2 - Processing parameters  
 SI 65536  
 SF 151.0786153 MHz  
 WDW EM  
 SSB 0  
 LB 1.00 Hz  
 GB 0  
 PC 1.00

1D NMR plot parameters  
 CX 20.00 cm  
 F1P 225.000 ppm  
 F1 33992.69 Hz  
 F2P -15.000 ppm  
 F2 -2266.18 Hz  
 PPMCM 12.00000 ppm/cm  
 HZCM 1812.94336 Hz/cm

176.72  
 175.92  
 168.44  
 163.97  
 148.47  
 146.86  
 135.70  
 135.40  
 133.82  
 130.64  
 128.24  
 117.68  
 116.24  
 79.46  
 79.24  
 79.16  
 79.03  
 78.49  
 72.43  
 49.43  
 49.28  
 49.20  
 49.19  
 49.18  
 49.14  
 49.06  
 49.06  
 49.04  
 49.00  
 48.92  
 48.86  
 48.72  
 48.58  
 37.19  
 36.47  
 31.02  
 18.61  
 13.83

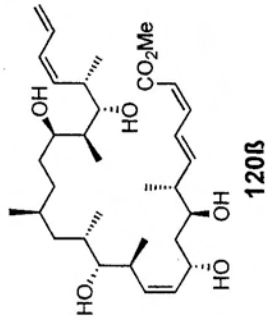

ppm

ppm

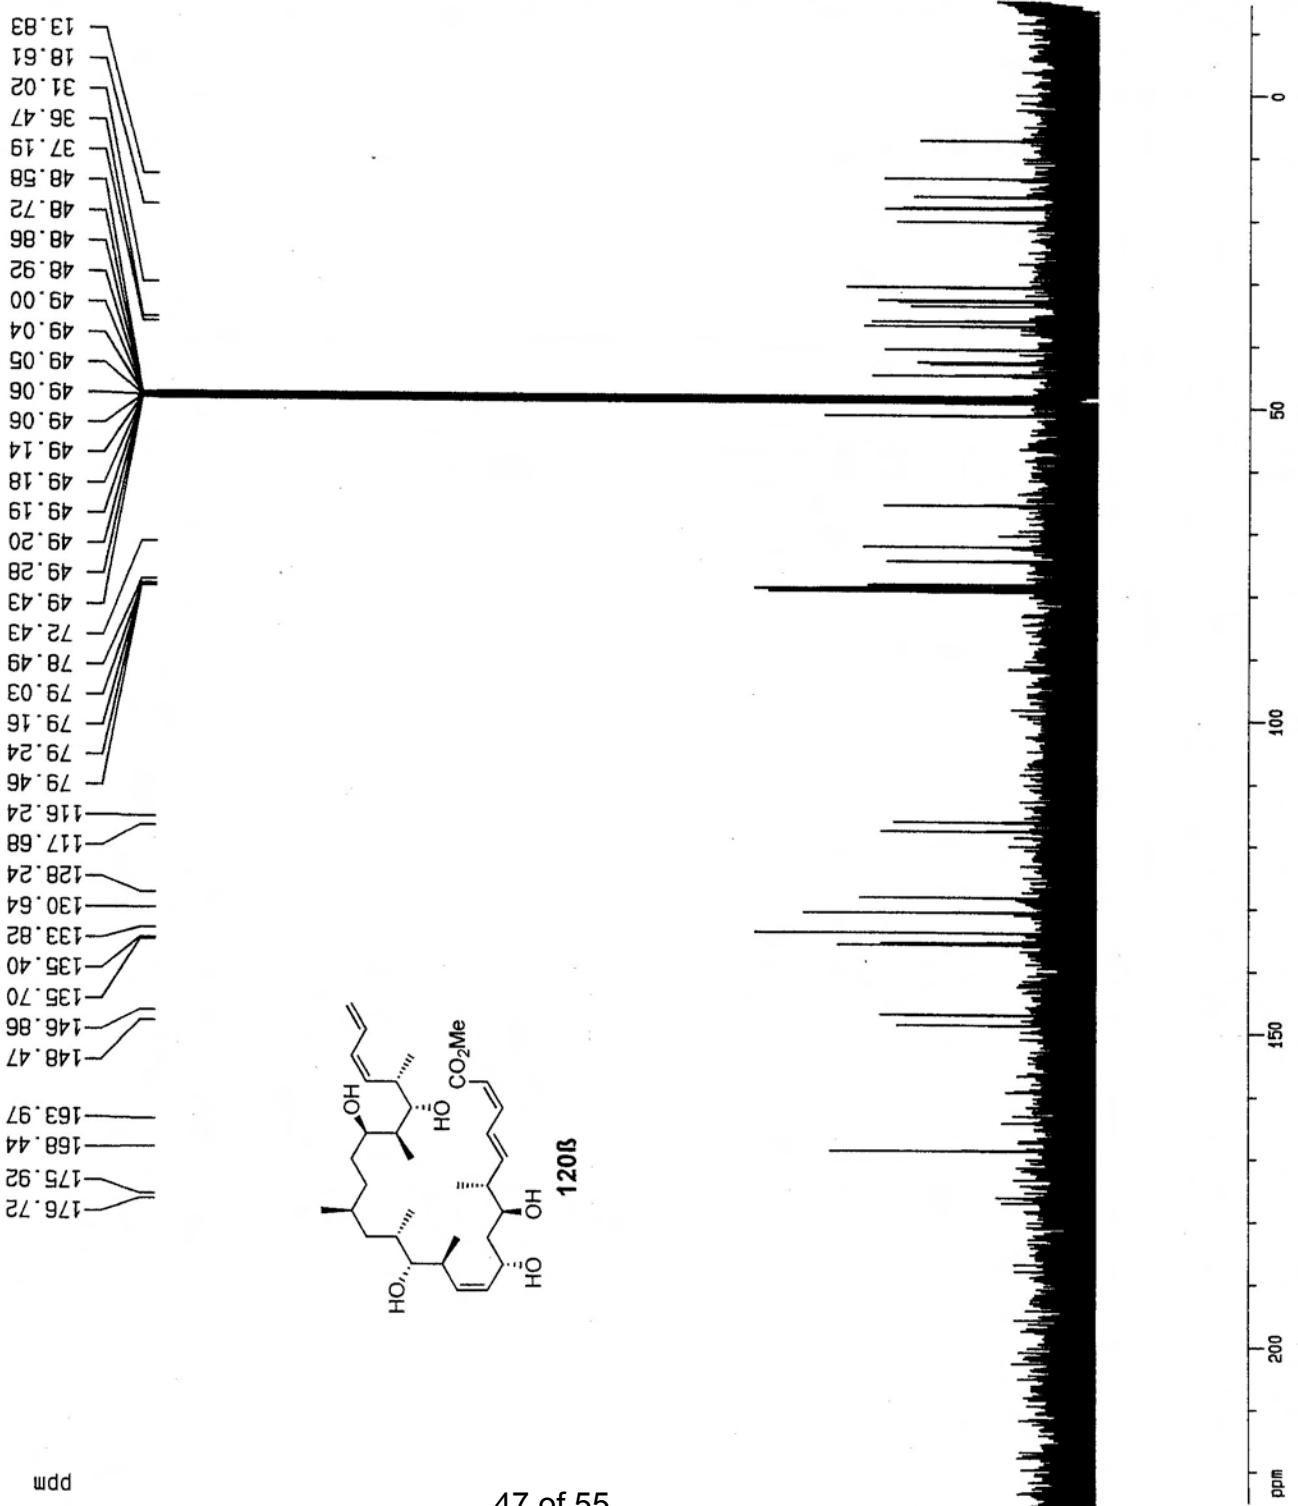

Current Data Parameters  
 NAME yss629-ft1  
 EXPNO 11  
 PROCNO 1

F2 - Acquisition Parameters  
 Date\_ 20040602  
 Time 13.38  
 INSTRUM spect

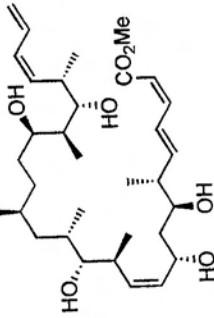

INU 0.00013320 SEC

\*\*\*\*\* CHANNEL f1 \*\*\*\*\*

NUC1 1H  
 P0 8.20 USEC  
 P1 9.50 USEC  
 PL1 0.00 DB  
 SF01 600.8336050 MHZ

F1 - Acquisition parameters

NO 1  
 TD 256  
 SF01 600.8336 MHZ  
 FIDRES 29.326200 HZ  
 SH 12.495 PPM

F2 - Processing parameters

SI 512  
 SF 600.8300100 MHZ  
 WDW SINE  
 SSB 0  
 LB 0.00 HZ  
 GB 0  
 PC 1.00

F1 - Processing parameters

SI 512  
 MCP GF  
 SF 600.8300099 MHZ  
 WDW SINE  
 SSB 0  
 LB 0.00 HZ  
 GB 0

2D NMR plot parameters

CX2 15.00 cm  
 CX1 15.00 cm  
 F2PLO 7.570 ppm  
 F2LO 4548.05 Hz  
 F2PHI 0.514 ppm  
 F2R1 369.07 Hz  
 F1PLO 7.643 ppm  
 F1LO 4592.22 Hz  
 F1PHI 0.639 ppm  
 F1R1 383.91 Hz  
 F2PPMCM 0.46369 ppm/cm  
 F2HZCM 278.59894 Hz/cm  
 F1PPMCM 0.46584 ppm/cm  
 F1HZCM 280.55396 Hz/cm

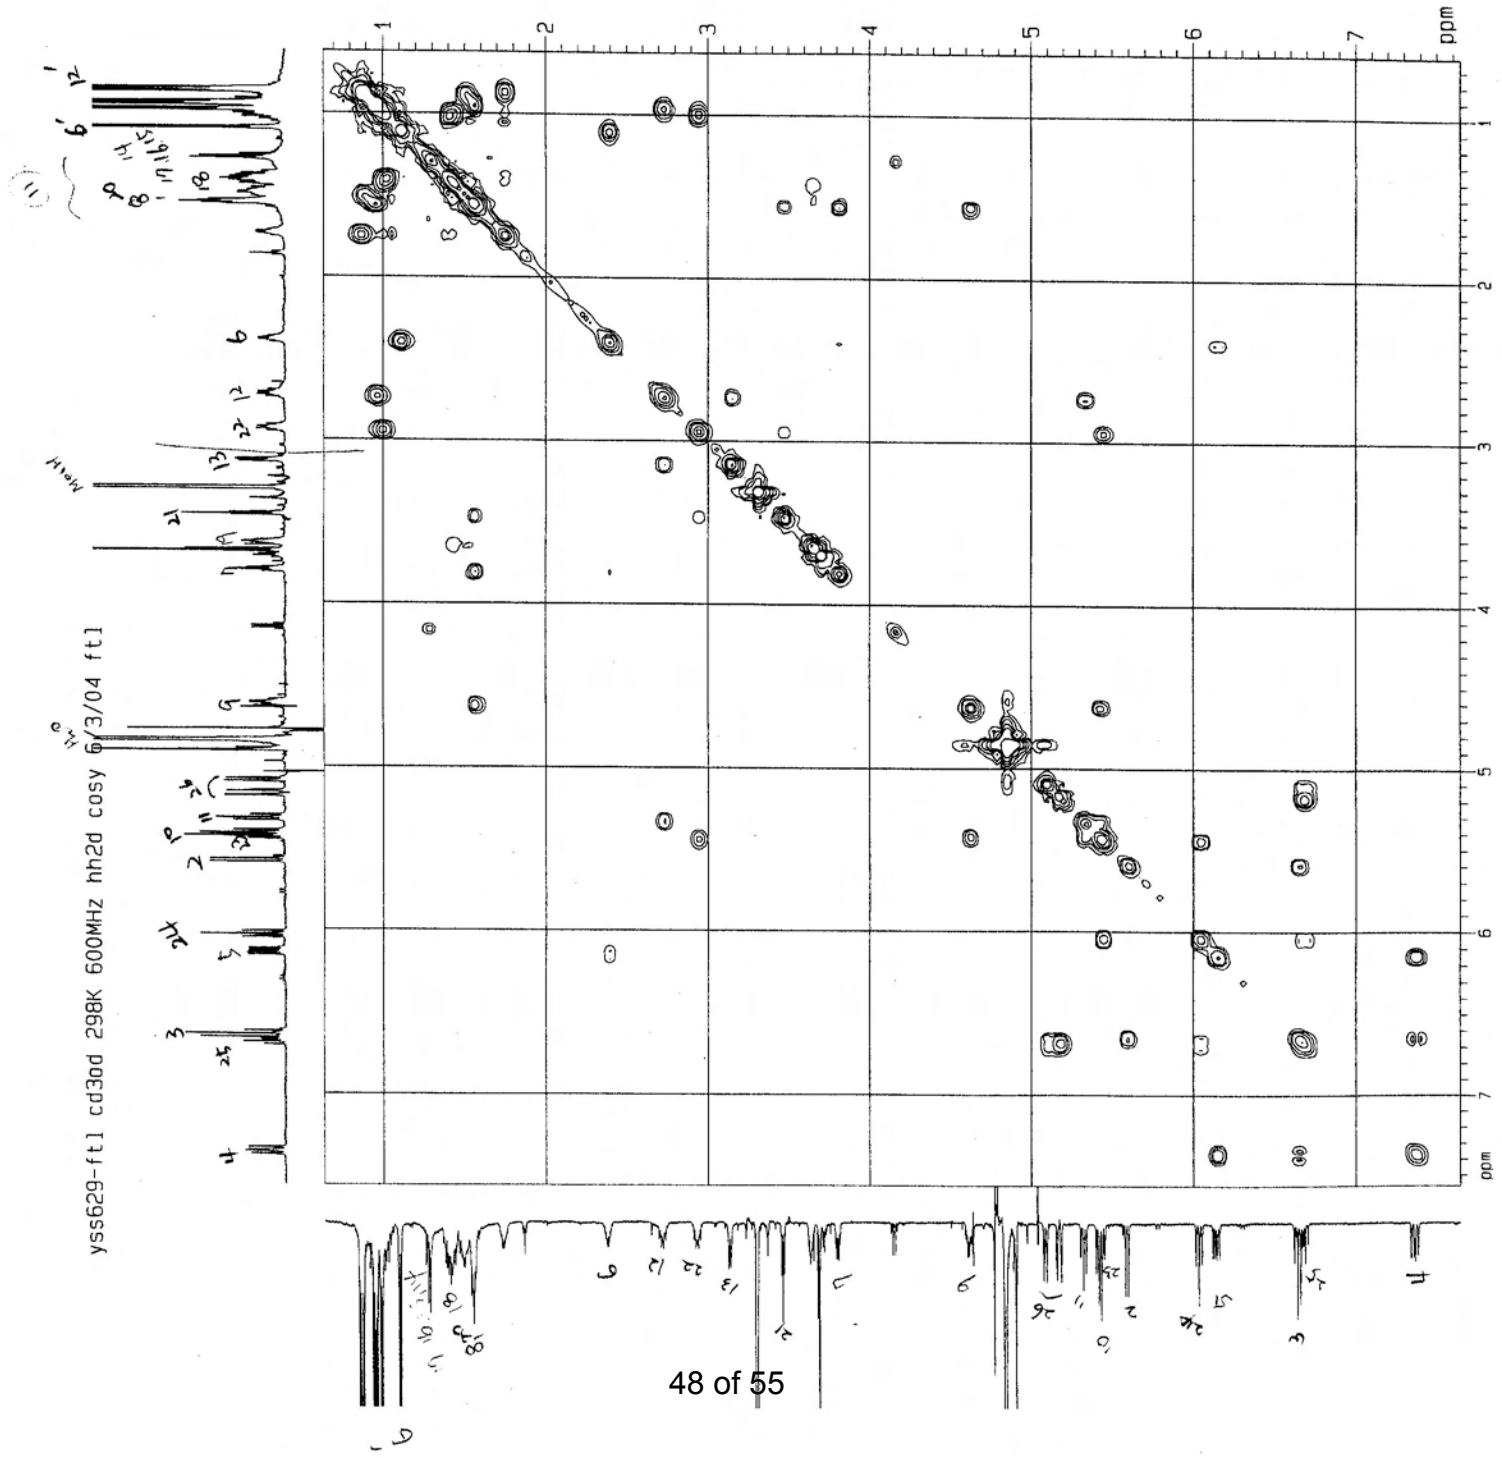



Current Data Parameters  
 NAME yms629-ft1  
 EXNO 12  
 PROCNO 1

F2 - Acquisition Parameters  
 Date\_ 20040603  
 Time 8.04  
 MicroM

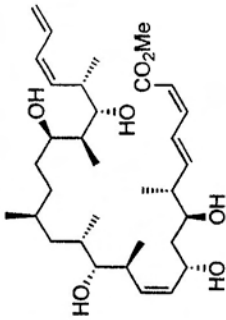

0.0000300 sec  
 0.0000000 sec  
 5000000.0000000 sec  
 0.00001000 sec

CHANNEL F1

NUC1 1H  
 P1 9.00 usec  
 PL1 0.00 dB  
 SF01 600.8529350 MHz

CHANNEL F2

CPDPR2 gppp  
 NUC2 13C  
 P2 13.00 usec  
 PL2 0.00 dB  
 SF02 151.0536567 MHz

GRABY CHANNEL

P16 1000.00 usec

F1 - Acquisition parameters  
 TD 168  
 SF01 151.0536 MHz  
 FIDRES 191.211680 Hz  
 SN 199.582 DDM

F2 - Processing parameters  
 SI 1024  
 SF 600.8500143 MHz  
 MDW SINE  
 SSB 0  
 LB 0.00 Hz  
 GB 0  
 PC 1.00

F1 - Processing parameters  
 SI 1024  
 SF 151.0736435 MHz  
 MDW SINE  
 SSB 0  
 LB 0.00 Hz  
 GB 0

2D NMR plot parameters  
 CX2 59.00 cm  
 CX1 55.00 cm  
 F2P0 7.989 DDM  
 F2L0 4800.20 Hz  
 F2PH 0.731 DDM  
 F2PI 475.12 Hz  
 F1P0 153.067 DDM  
 F1L0 23129.21 Hz  
 F1PH 2.522 DDM  
 F1PI 961.05 Hz  
 F2PDMN 0.38332 DDM/cm  
 F2LDMN 240.38337 Hz/cm  
 F1PDMN 10.07185 DDM/cm  
 F1LDMN 1516.47461 Hz/cm

yms629-ft1 cd3od 298K 600MHz/151MHz hc2d (HMBC) 6/a/04 ft1

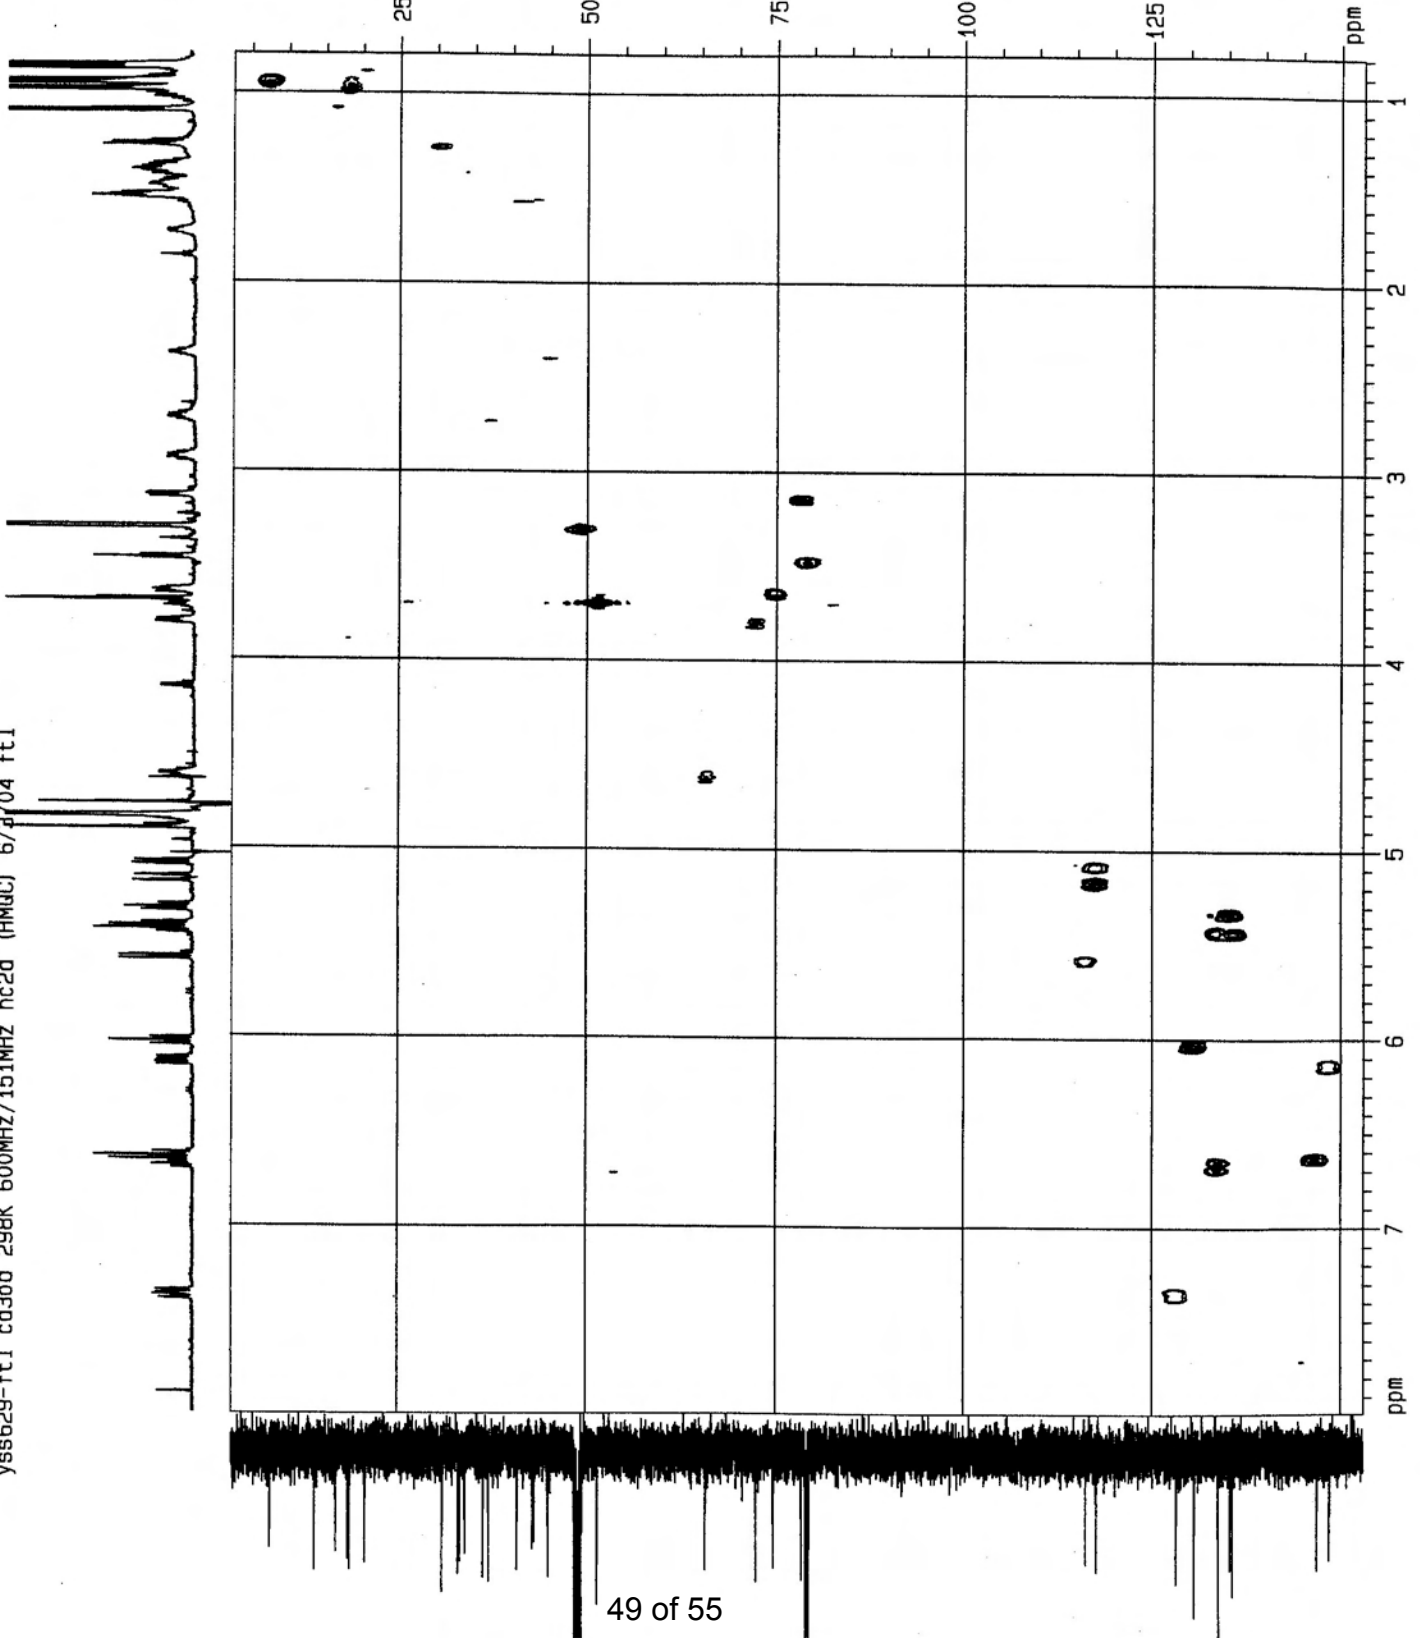

Current Data Parameters  
 NAME Y55629-ft1  
 EXPNO 1122  
 PROCNO 1

Date\_   
 F2 - Acquisition Parameter  
 20040603

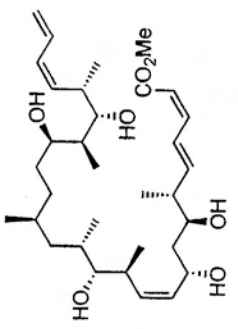

1.00000000 SEL  
 0.05000000 SEC  
 0.00000000 SEC  
 0.00000000 SEC  
 0.00000000 SEC  
 0.00001655 SEC

\*\*\*\*\* CHANNEL f1 \*\*\*\*\*  
 NUC1 1H  
 P1 9.50 USEC  
 P2 15.20 USEC  
 PL1 0.00 DB  
 SFO1 600.0325836 MHZ

\*\*\*\*\* CHANNEL f2 \*\*\*\*\*  
 NUC2 13C  
 P3 13.50 USEC  
 PL2 0.00 DB  
 SFO2 151.0938719 MHZ

\*\*\*\*\* GRADIENT CHANNEL \*\*\*\*\*  
 P16 1000.00 USEC

f1 - Acquisition parameter  
 RD0 2  
 TD 256  
 SFO1 151.0939 MHZ  
 FIDRES 118.013596 HZ  
 SN 199.952 ppm

f2 - Processing parameter  
 SI 1024  
 SF 600.8300154 MHZ  
 SINE  
 NSB 0  
 LB 0.00 HZ  
 GB 0  
 PC 1.00

f1 - Processing parameter  
 SI 2048  
 SF 151.0787645 MHZ  
 SINE  
 NSB 0  
 LB 0.00 HZ  
 GB 0

2D NMR plot parameters  
 CX2 18.00 cm  
 CX1 15.00 cm  
 F2PLO 7.463 ppm  
 F2LO 4484.00 HZ  
 F2PHI 0.567 ppm  
 F2HI 400.95 HZ  
 F1PLO 171.080 ppm  
 F1LO 25946.58 HZ  
 F1PHI 3.623 ppm  
 F1HI 547.41 HZ  
 F2PNDM 0.37754 ppm/cm  
 F2ZCDM 226.83563 HZ/cm  
 F1PNDM 11.16379 ppm/cm  
 F1ZCDM 1696.81068 HZ/cm

Y55629-ft1 cd30d 298K 600MHZ/151MHZ hc2d (HMQC) 6/3/04 ft1

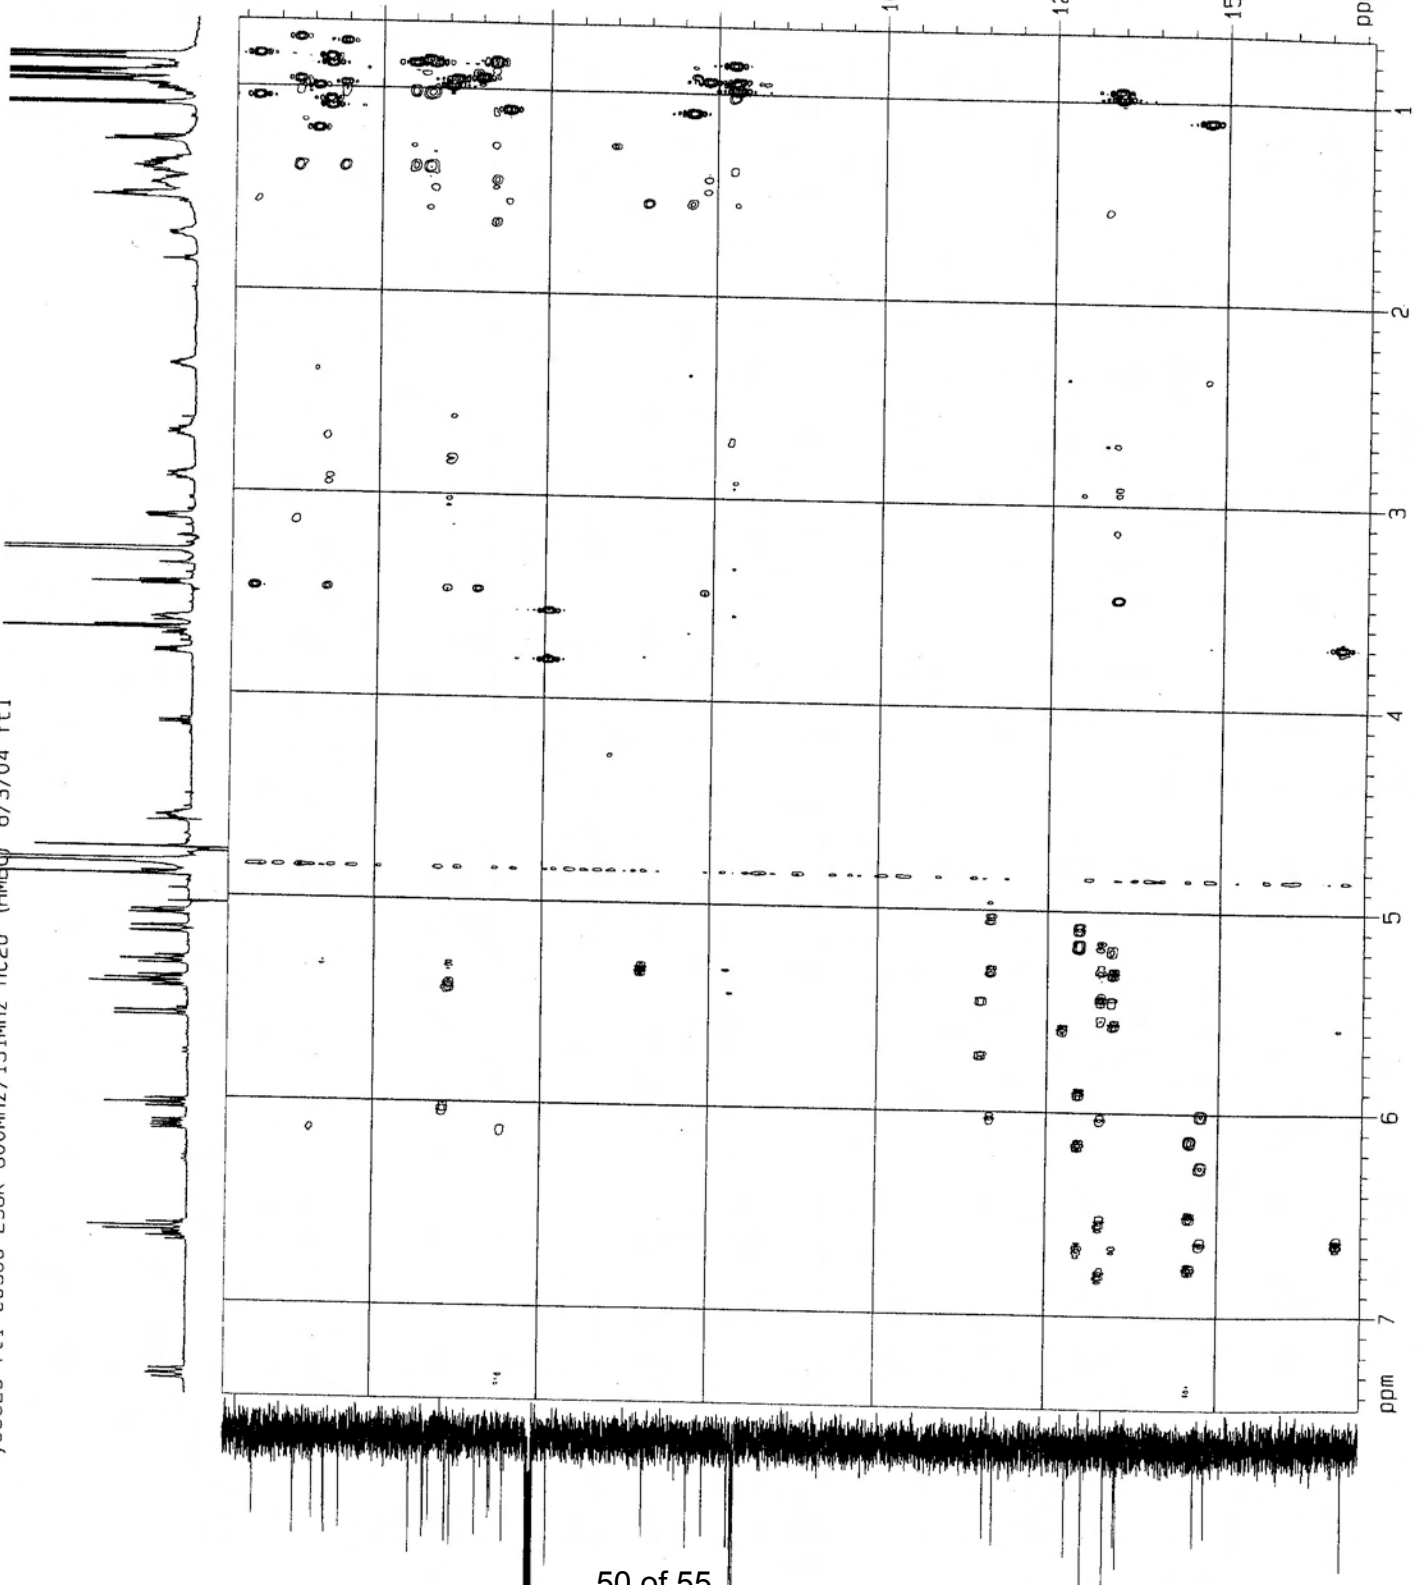

yss652-2 cd30d 298K 600MHz 1H delay 12sec 7/2/04 ft1

Current Data Parameters  
 NAME yss652-2-ft1  
 EXPNO 10  
 PROCNO 1

F2 - Acquisition Parameters  
 Date\_ 20040702  
 Time 11.44  
 INSTRUM spect  
 PROBHD 5 mm TBI 1H/  
 PULPROG zg  
 TD 65536  
 SOLVENT CD2C12  
 NS 8  
 DS 0  
 SWH 8992.806 Hz  
 FIDRES 0.137219 Hz  
 AQ 3.6438515 sec  
 RG 10  
 DW 55.600 usec  
 DE 6.00 usec  
 TE 290.0 K  
 D1 12.00000000 sec

==== CHANNEL f1 ====  
 NUC1 1H  
 P1 9.00 usec  
 PL1 0.00 dB  
 SF01 600.8336050 MHz

F2 - Processing parameters  
 SI 65536  
 SF 600.8300180 MHz  
 WDW EM  
 SSB 0  
 LB 0.10 Hz  
 GB 0  
 PC 1.00

1D NMR plot parameters  
 CX 20.00 cm  
 F1P 8.000 ppr  
 F1 4806.64 Hz  
 F2P 0.000 ppr  
 F2 0.00 Hz  
 PPMCM 0.40000 ppr  
 HZCM 240.33200 Hz

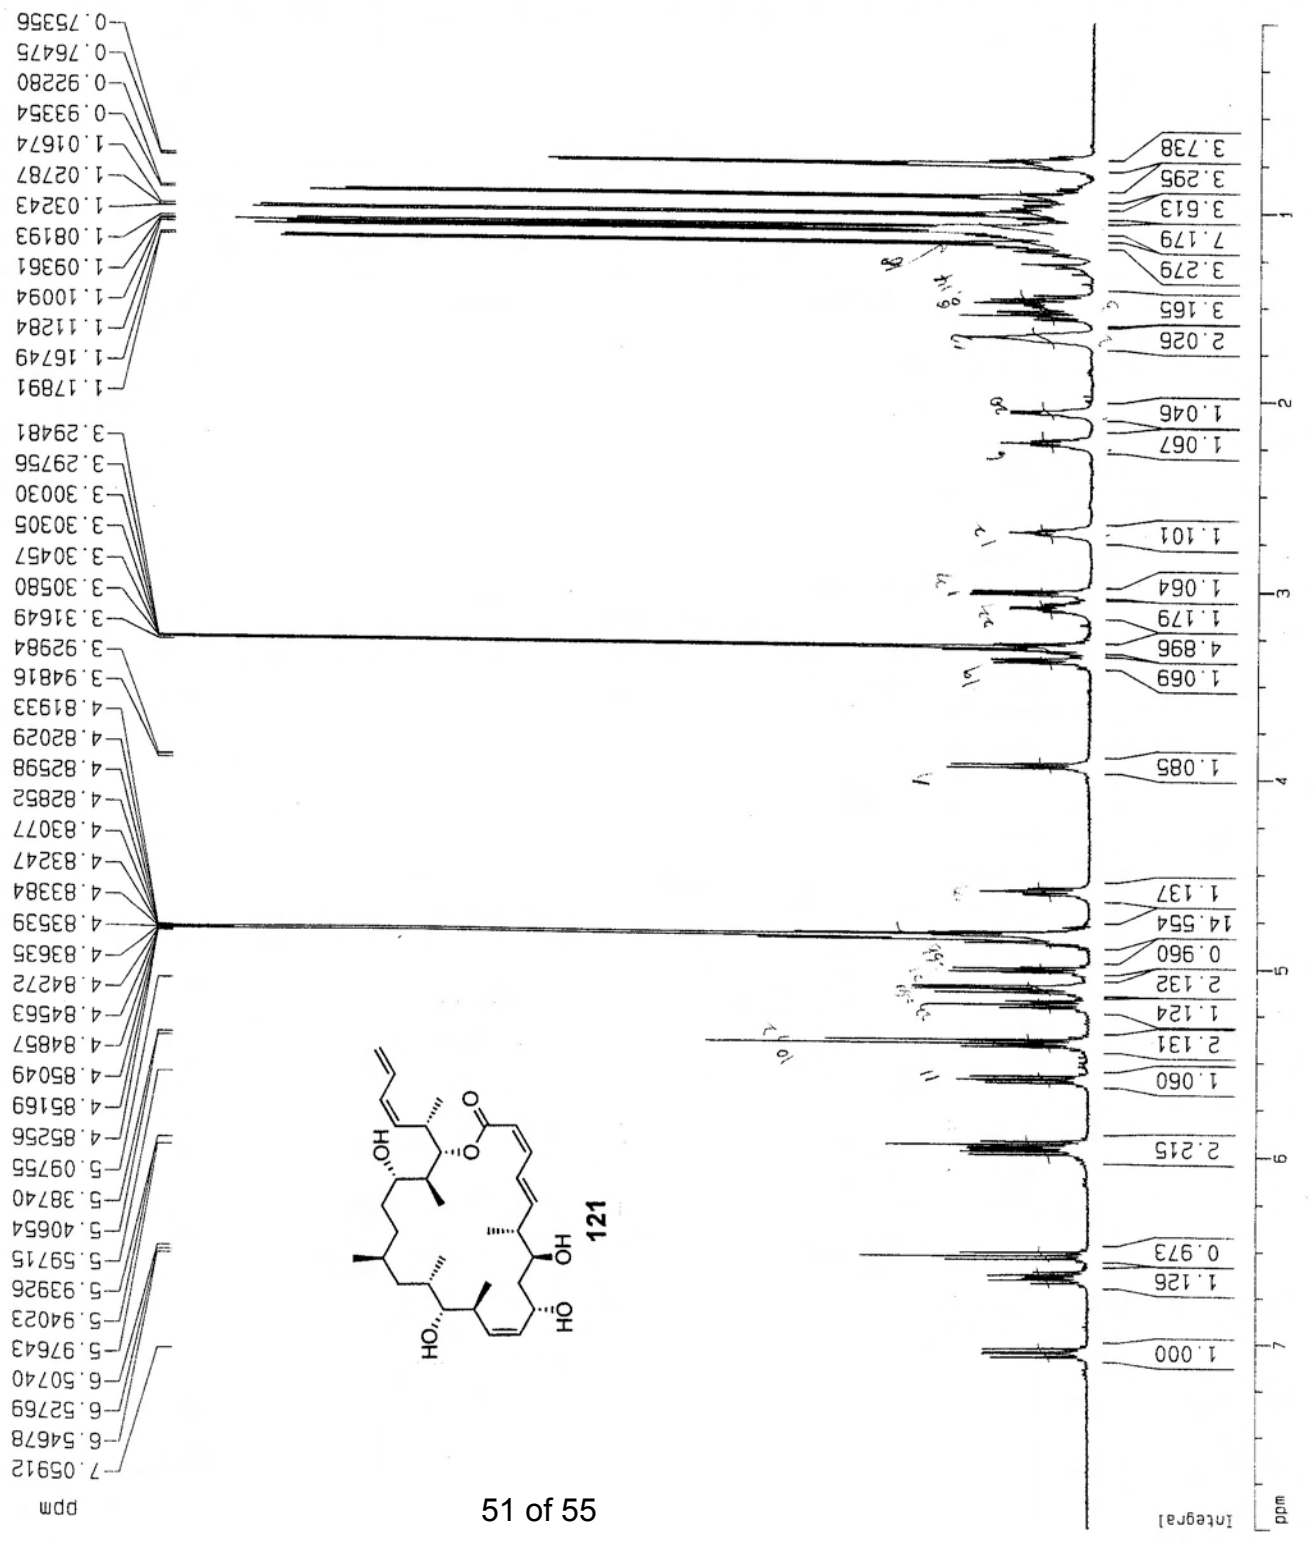

yss652-2 cd30d 298K 151MHz 13C 1H decp delay 8sec 7/2/04 ft1

Current Data Parameters  
 NAME yss652-2-ft1  
 EXPNO 2  
 PROCNO 1

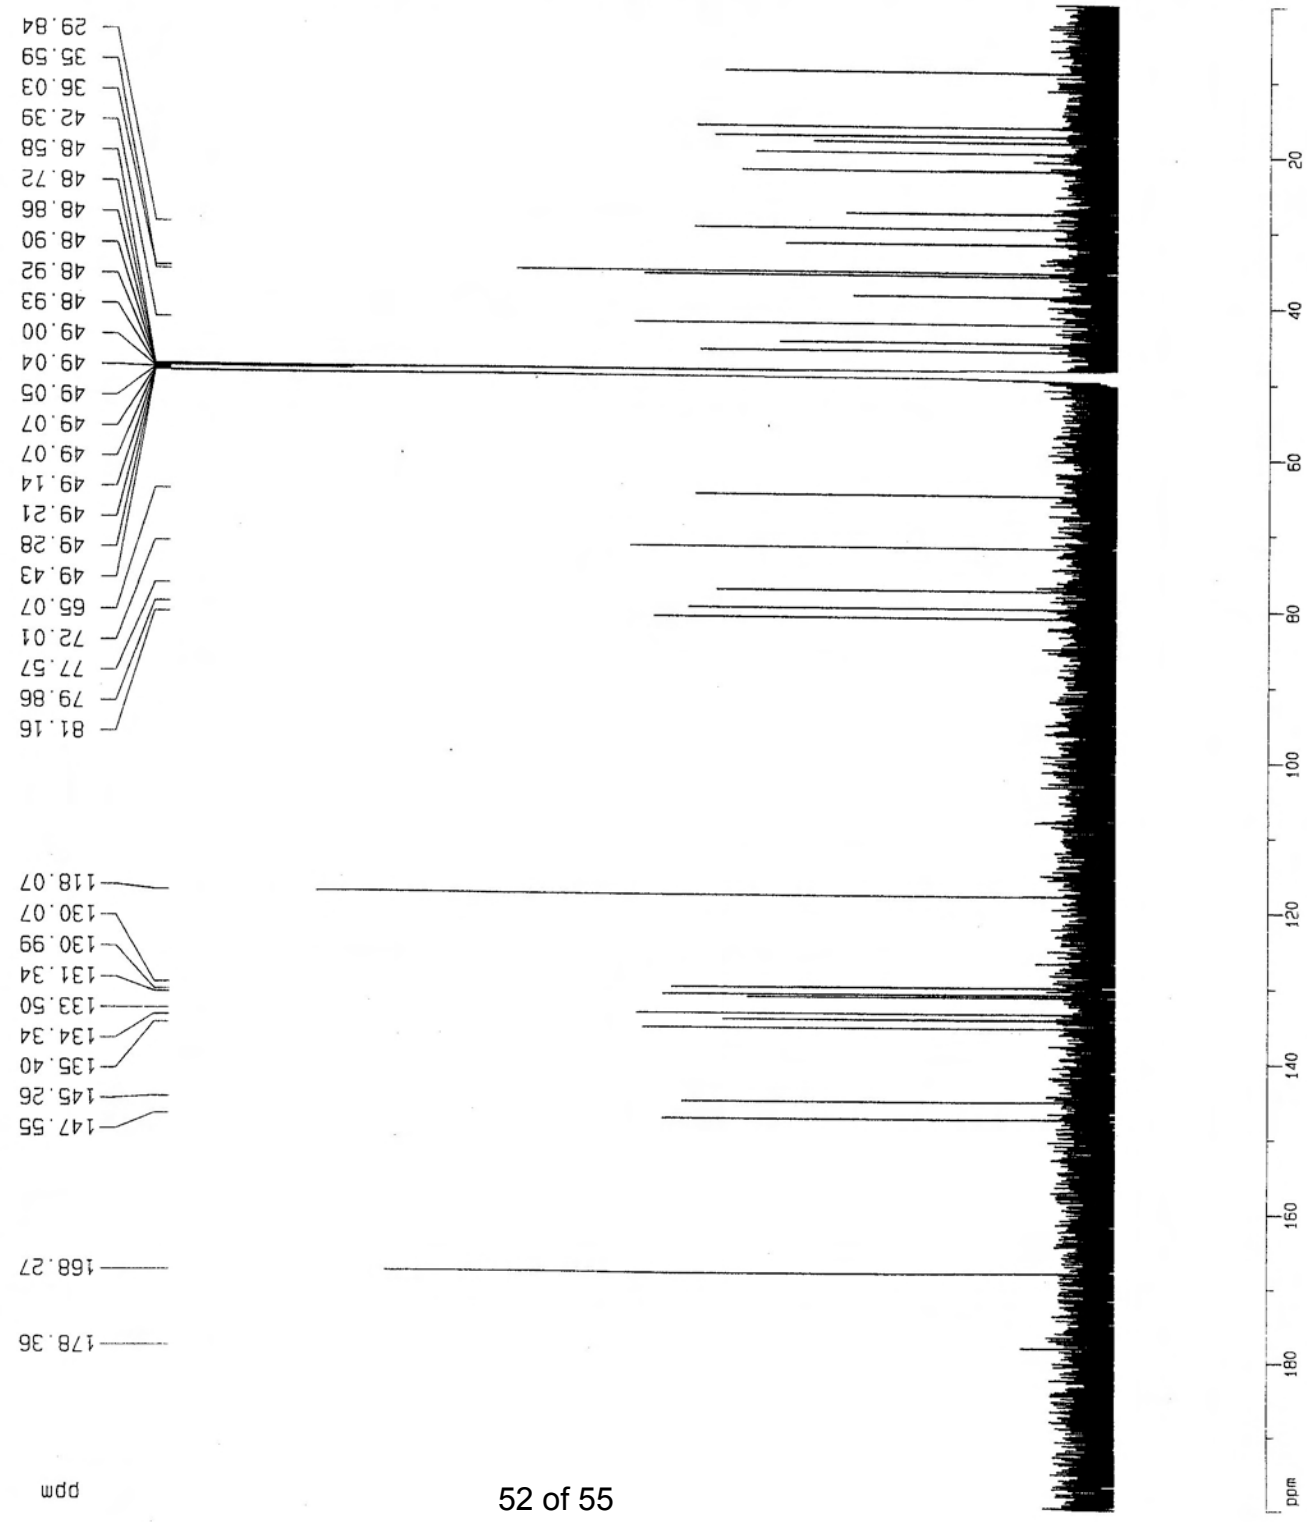

81.16  
79.86  
77.57  
72.01  
65.07  
49.43  
49.28  
49.21  
49.14  
49.07  
49.07  
49.05  
49.04  
49.00  
48.93  
48.92  
48.90  
48.86  
48.72  
48.58  
42.39  
36.03  
35.59  
29.84

178.36  
168.27  
147.55  
145.26  
135.40  
134.34  
133.50  
131.34  
130.99  
130.07  
130.07  
118.07

ppm

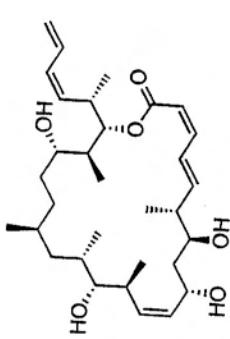

121

FIDRES 0.071984 Hz  
 AG 0.8651252 sec  
 RG 32768  
 DW 13.200 usec  
 DE 6.00 usec  
 TE 290.0 K  
 D1 8.00000000 sec  
 D3 0.00100000 sec

==== CHANNEL f1 =====  
 NUC1 13C  
 P1 13.50 usec  
 PL1 0.00 dB  
 SF01 151.0953827 MHz

==== CHANNEL f2 =====  
 CPDPRG2 waltz16  
 NUC2 1H  
 PCPD2 100.00 usec  
 PL2 0.00 dB  
 PL12 12.00 dB  
 SF02 600.8336050 MHz

F2 - Processing parameters  
 SI 65536  
 SF 151.0786118 MHz  
 WDW EM  
 SSB 0  
 LB 1.00 Hz  
 GB 0  
 PC 1.00

1D NMR plot parameters  
 CX 20.00 cm  
 F1P 200.000 ppm  
 F1 30215.72 Hz  
 F2P 0.000 ppm  
 F2 0.00 Hz  
 PPMCM 10.00000 ppm/cm  
 HZCM 1510.78613 Hz/cm

Current Data Parameters  
 NAME yss652-2-ft1  
 EXPNO 11  
 PROCNO 1

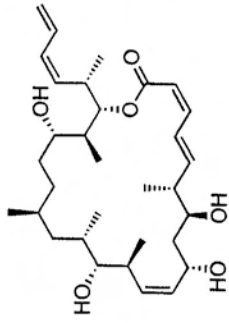

TE 400.14 N  
 D0 0.0000300 sec  
 D1 1.0000000 sec  
 IN0 0.0001320 sec

\*\*\*\*\* CHANNEL f1 \*\*\*\*\*  
 NUC1 1H  
 P0 8.20 usec  
 P1 9.60 usec  
 PL1 0.00 dB  
 SFO1 500.833650 MHz

F1 - Acquisition parameters

ND0 1  
 TD 256  
 SFO1 500.8336 MHz  
 FIDRES 29.326200 Hz  
 SW 12.485 ppm

F2 - Processing parameters

SF 512  
 SF 500.830091 MHz  
 WDW SINE  
 SSB 0  
 LB 0.00 Hz  
 GB 0  
 PC 1.00

F1 - Processing parameters

SF 512  
 MC2 0  
 SF 500.830091 MHz  
 WDW SINE  
 SSB 0  
 LB 0.00 Hz  
 GB 0

2D NMR plot parameters

CX2 15.00 cm  
 CX1 15.00 cm  
 F2PLO 7.327 ppm  
 F2LO 4402.37 Hz  
 F2PHI 0.567 ppm  
 F2H1 340.69 Hz  
 F1PLO 7.326 ppm  
 F1LO 4401.75 Hz  
 F1PHI 0.542 ppm  
 F1H1 325.41 Hz  
 F2PMCM 0.45057 ppm/cm  
 F2HZCM 270.77859 Hz/cm  
 F1PMCM 0.45230 ppm/cm  
 F1HZCM 271.75513 Hz/cm

yss652-2 cd30d 298K 600MHz hh2d cosy 6/30/04 ft1

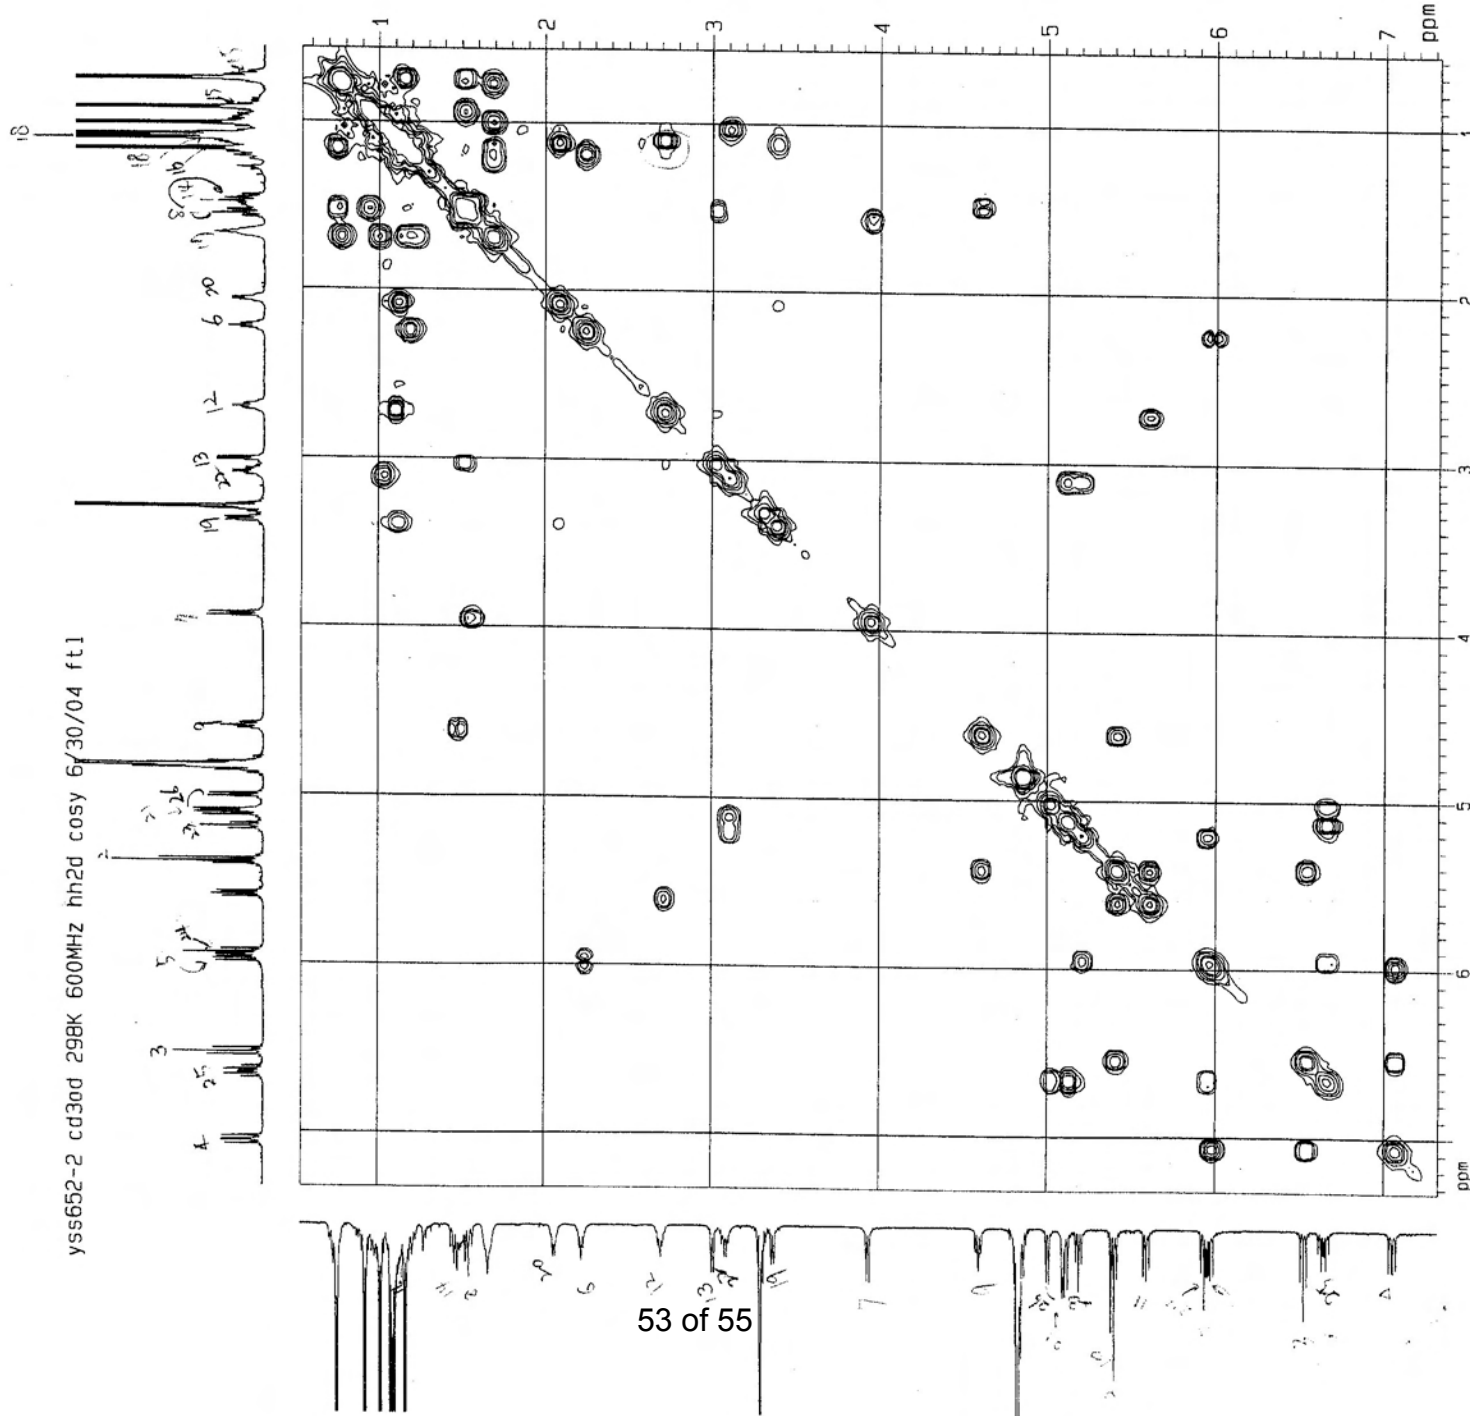

YSS652-2 cd30d 298K 600Mz/151MHz hc2d (HMQC) 6/30/04 ft1

Current Data Name  
YSS652-2-ft1  
EXPNO 12  
PROCNO 1

F2 - Acquisition Para

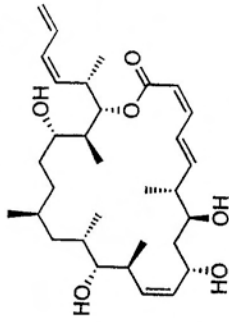

121

```

01 1.50000000 SE
02 0.0034828 SE
03 0.0002000 SE
04 0.0000300 SE
05 0.0005000 SE
06 0.0024528 SE
07 0.00001655 SE
***** CHANNEL F1 **
NUC1 1H
P1 9.60 US
P2 19.20 US
PL1 0.00 DB
SF01 600.8275935 MHz
***** CHANNEL F2 **
CPDPRG2 gexp
NUC2 13C
P3 13.50 US
PL2 0.00 DB
PL12 12.00 DB
SF02 151.0835637 MHz
***** GRADIENT CHAN
P16 1000.00 US
  
```

```

F1 - Acquisition Para
NUC 13C
TD 256
SF01 151.08356 MHz
FIDRES 118.013596 Hz
SOLVENT 159.852 DMS
  
```

```

F2 - Processing Para
SI 1024
SF 600.8300141 MHz
SOLVENT DMS
LB 0.00 Hz
GB 0
PC 1.00
  
```

```

F1 - Processing Para
SI 1024
SF 151.0786445 MHz
SOLVENT DMS
LB 0.00 Hz
GB 0
  
```

```

2D NMR Data Name
C12 16.00 CH
C11 15.00 CH
F2R10 7.210 DP
F2L0 4332.17 Hz
F3R01 0.625 DP
F3L0 375.41 Hz
F4R01 152.289 DP
F4L0 23005.38 Hz
F5R01 5.445 DP
F5L0 822.65 Hz
F6R01 0.36585 DP
F6L0 249.82008 Hz
F7R01 9.75028 DP
F7L0 1430.40008 Hz
  
```

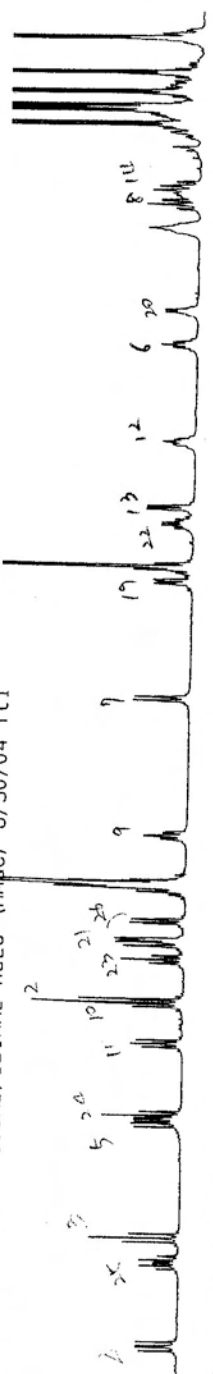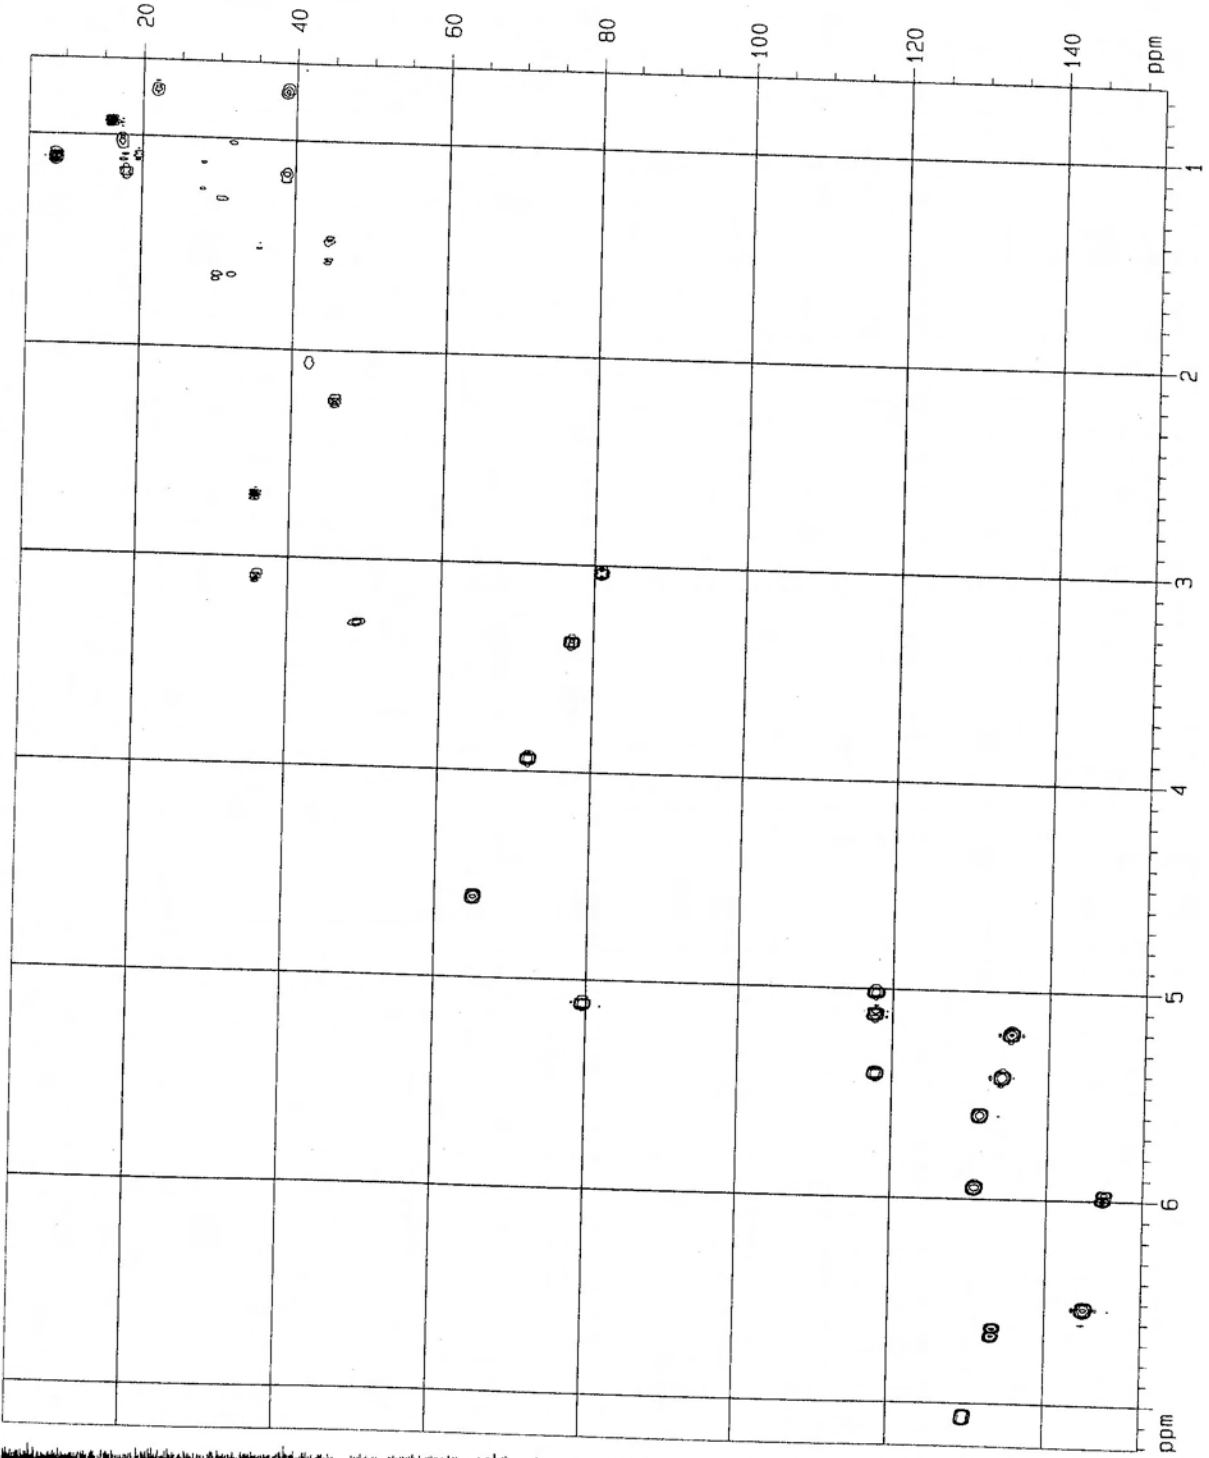

Current Data Parameters  
 NAME yss652-2-ft1  
 EXPNO 1122  
 PROCNO 1

yss652-2 cd3od 298K 600MHz/151Mz hc2d (HMBC) 7/1/04 ft1

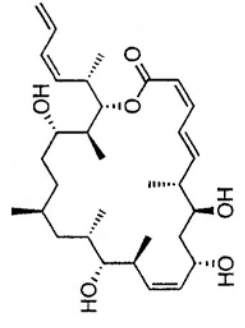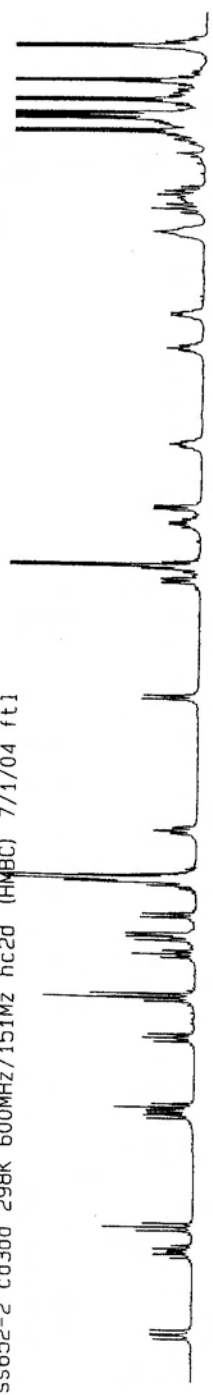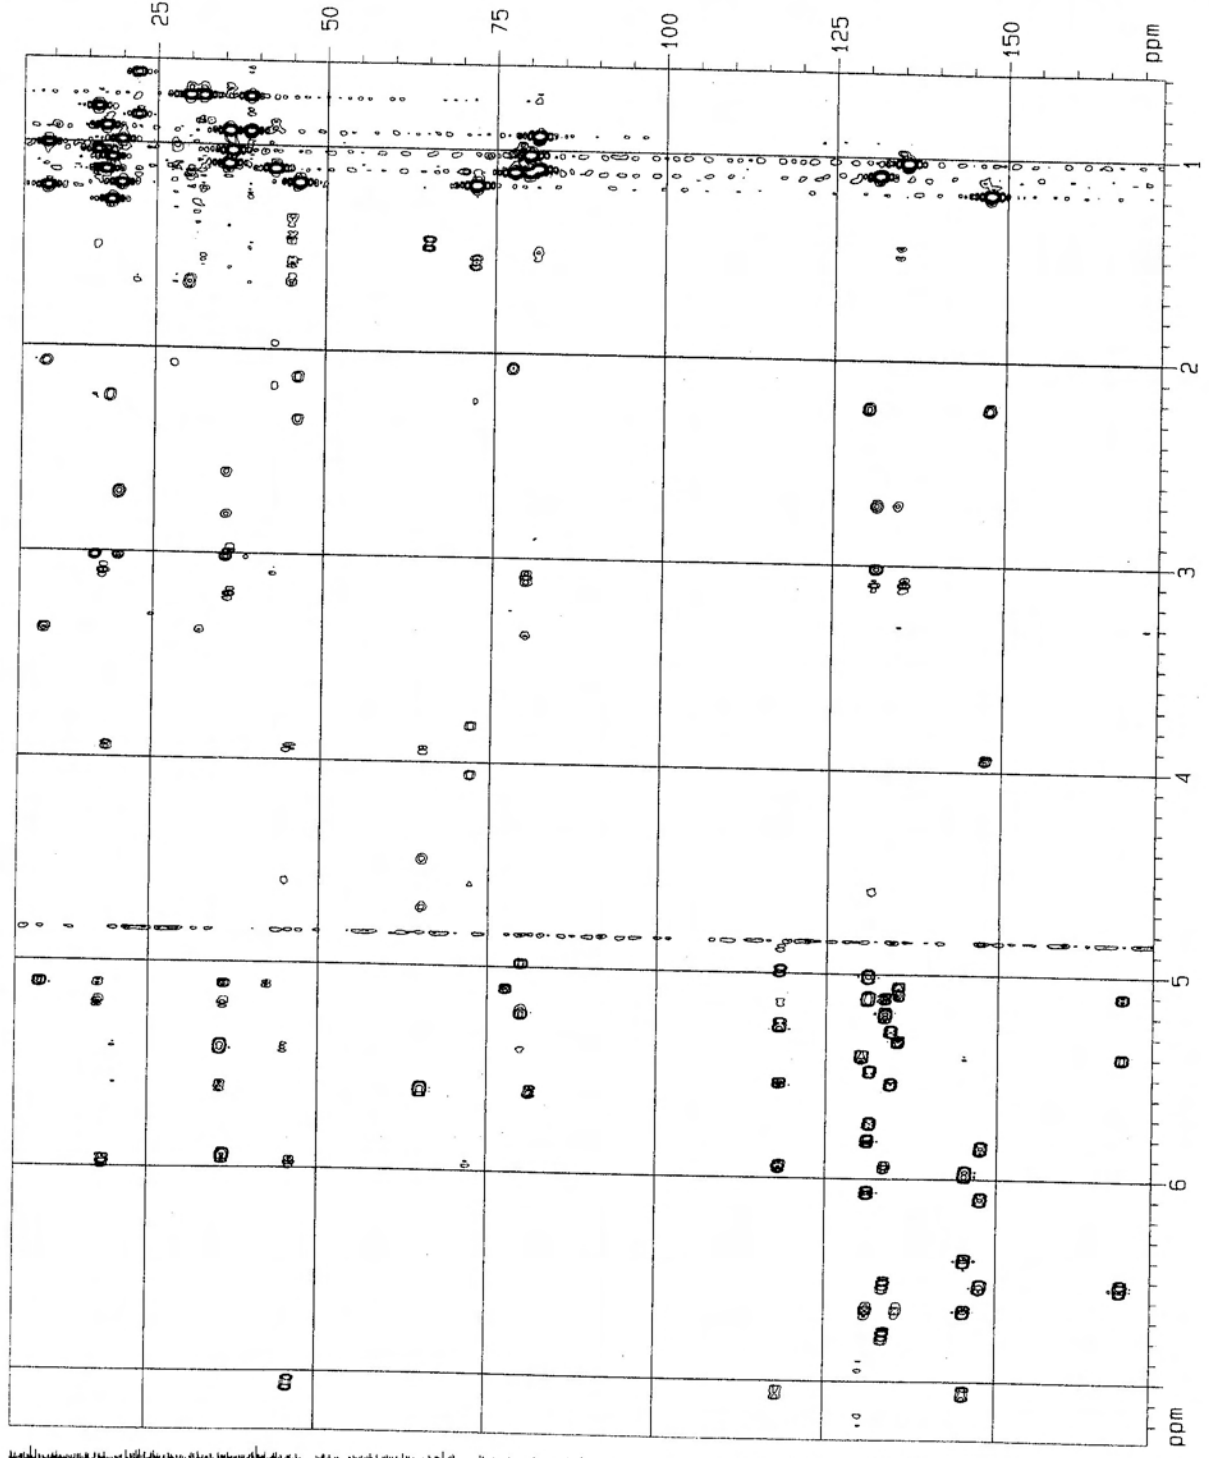

```

***** CHANNEL F1 *****
NUC1 13C
P1 9.60 USEC
P2 19.20 USEC
PL1 0.00 DB
SF01 600.8325835 MHz

***** CHANNEL F2 *****
NUC2 13C
P3 13.50 USEC
PL2 0.00 DB
SF02 151.0938719 MHz

***** GRADIENT CHANNEL # *****
G16 1000.00 USEC

F1 - Acquisition parameter:
NU0 2
TD 256
SF01 151.0939 MHz
FIDRES 148.013596 Hz
SM 199.952 psm

F2 - Processing parameter:
SI 1024
SF 600.830155 MHz
WDW SINC
SSB 0
LB 0.00 Hz
GB 0
PC 1.00

F1 - Processing parameter:
SI 2048
MC2 OF
SF 151.0785971 MHz
WDW SINC
SSB 0
LB 0.00 Hz
GB 0

2D NMR plot parameters:
CX2 18.00 cm
CX1 15.00 cm
F2PLO 7.287 ppm
F2LO 4378.05 Hz
F2PHI 0.587 ppm
F2H1 352.89 Hz
F1PLO 172.774 ppm
F1LO 26102.51 Hz
F1PHI 5.610 ppm
F1H1 847.60 Hz
F2PHIOM 0.37219 ppm/cm
F2HZOM 223.62018 Hz/cm
F1PHIOM 11.14427 ppm/cm
  
```
